# Supplementary material
Source: PubMed Central journal article supplement (PMC6126947)

Figure 1 Flow Sorting  
Controls  
HEK293T

# HEK293T negative control

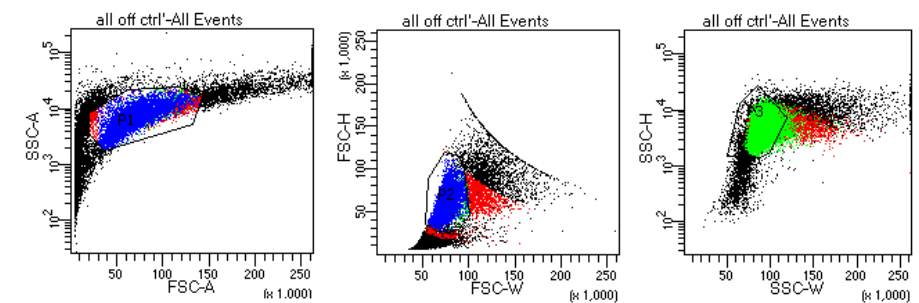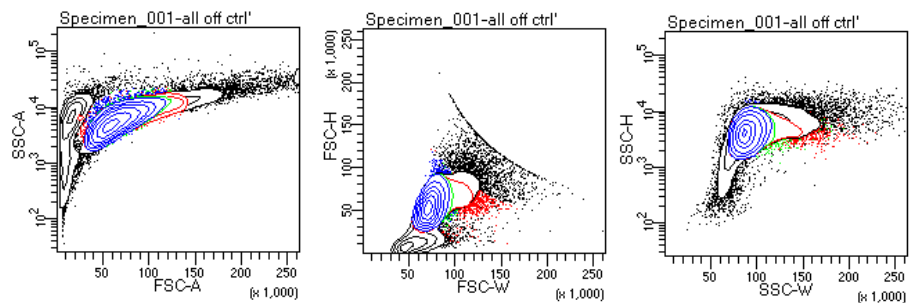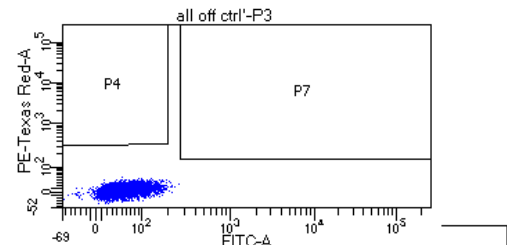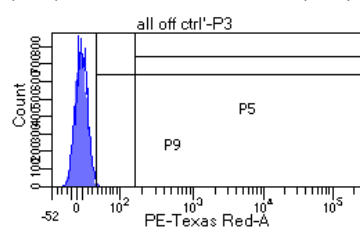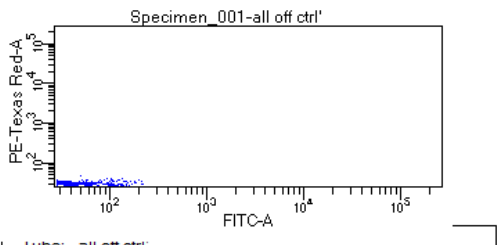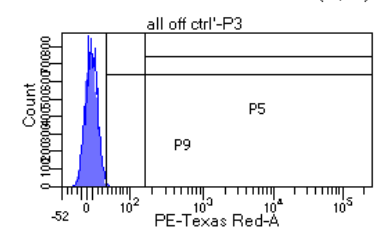

| Population | #Events | %Parent | %Total |
|------------|---------|---------|--------|
| All Events | 18,719  | ####    | 100.0  |
| P1         | 11,875  | 63.4    | 63.4   |
| P2         | 10,487  | 88.3    | 56.0   |
| P3         | 10,000  | 95.4    | 53.4   |
| P4         | 0       | 0.0     | 0.0    |
| P5         | 0       | 0.0     | 0.0    |
| P6         | 1       | 0.0     | 0.0    |
| P7         | 0       | 0.0     | 0.0    |
| P9         | 15      | 0.2     | 0.1    |

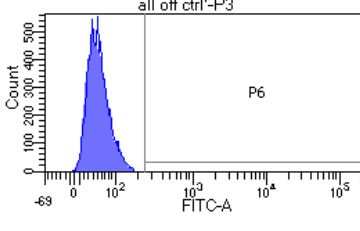

| Population | #Events | %Parent | %Total |
|------------|---------|---------|--------|
| All Events | 18,719  | ####    | 100.0  |
| P1         | 11,875  | 63.4    | 63.4   |
| P2         | 10,487  | 88.3    | 56.0   |
| P3         | 10,000  | 95.4    | 53.4   |
| P4         | 0       | 0.0     | 0.0    |
| P5         | 0       | 0.0     | 0.0    |
| P6         | 1       | 0.0     | 0.0    |
| P7         | 0       | 0.0     | 0.0    |
| P9         | 15      | 0.2     | 0.1    |

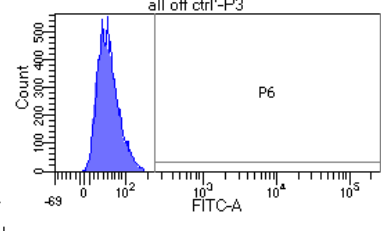

Specimen Name: Specimen\_001  
 Tube Name: all off ctrl'  
 Record Date: Apr 12, 2018 10:47:11 AM  
 SOP: LukeKoblan  
 GUID: ce19a28b-25f0-4e2a-b969-f31...

| Population | #Events | %Parent | FITC-A |        | PE-Te... |        |
|------------|---------|---------|--------|--------|----------|--------|
|            |         |         | Mean   | Median | Mean     | Median |
| All Events | 18,719  | ####    | 67     | 47     | 5        | 3      |
| P1         | 11,875  | 63.4    | 54     | 47     | 4        | 3      |
| P2         | 10,487  | 88.3    | 50     | 44     | 3        | 3      |
| P3         | 10,000  | 95.4    | 48     | 44     | 3        | 3      |
| P4         | 0       | 0.0     | ####   | ####   | ####     | ####   |
| P5         | 0       | 0.0     | ####   | ####   | ####     | ####   |
| P6         | 1       | 0.0     | 258    | 258    | 26       | 26     |
| P7         | 0       | 0.0     | ####   | ####   | ####     | ####   |
| P9         | 15      | 0.2     | 86     | 87     | 41       | 40     |

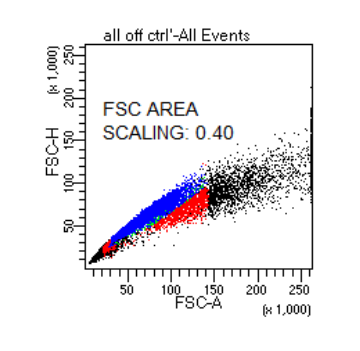

Specimen Name: Specimen\_001  
 Tube Name: all off ctrl'  
 Record Date: Apr 12, 2018 10:47:11 AM  
 SOP: LukeKoblan  
 GUID: ce19a28b-25f0-4e2a-b969-f31...

| Population | #Events | %Parent | FITC-A |        | PE-Te... |        |
|------------|---------|---------|--------|--------|----------|--------|
|            |         |         | Mean   | Median | Mean     | Median |
| All Events | 18,719  | ####    | 67     | 47     | 5        | 3      |
| P1         | 11,875  | 63.4    | 54     | 47     | 4        | 3      |
| P2         | 10,487  | 88.3    | 50     | 44     | 3        | 3      |
| P3         | 10,000  | 95.4    | 48     | 44     | 3        | 3      |
| P4         | 0       | 0.0     | ####   | ####   | ####     | ####   |
| P5         | 0       | 0.0     | ####   | ####   | ####     | ####   |
| P6         | 1       | 0.0     | 258    | 258    | 26       | 26     |
| P7         | 0       | 0.0     | ####   | ####   | ####     | ####   |
| P9         | 15      | 0.2     | 86     | 87     | 41       | 40     |

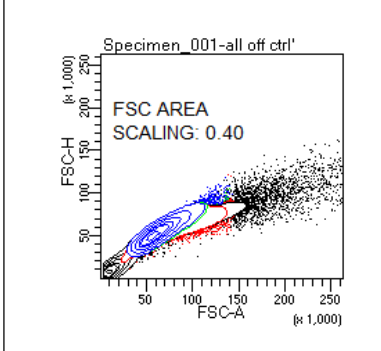

# HEK293T GFP+ control

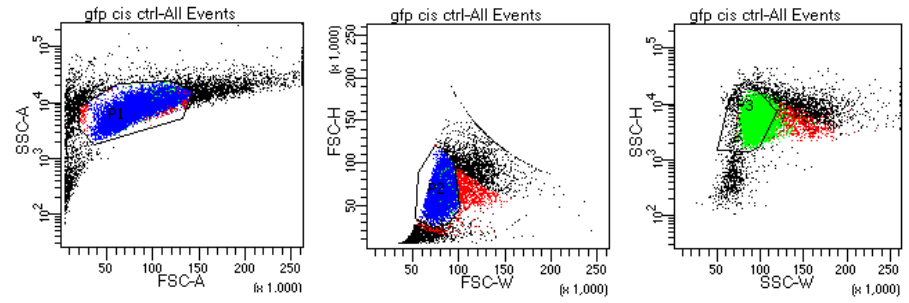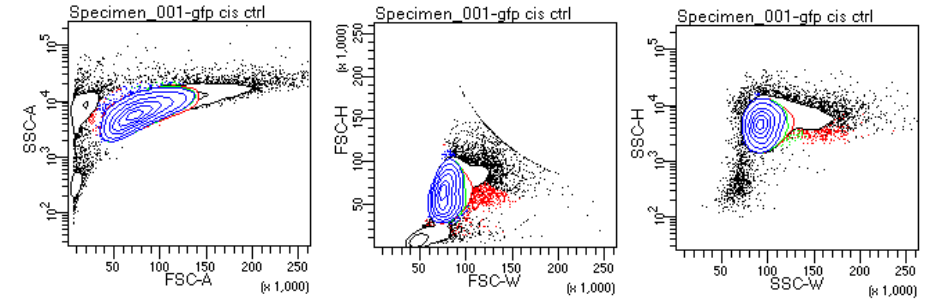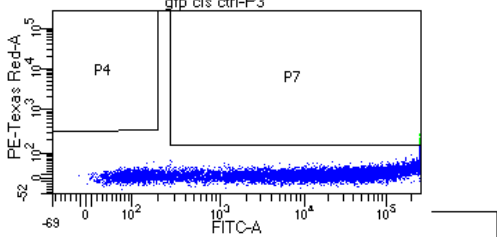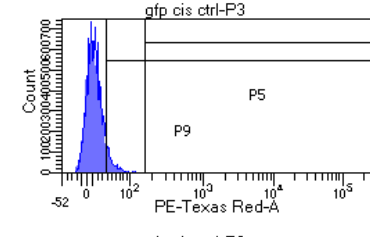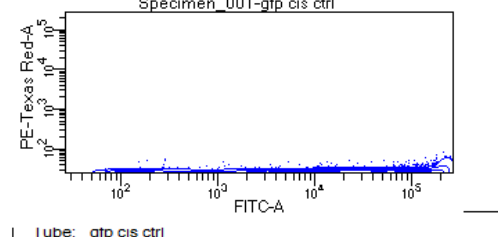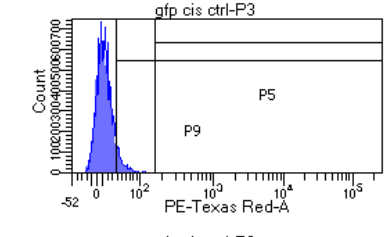

| Population | #Events | %Parent | %Total |
|------------|---------|---------|--------|
| All Events | 14,598  | ####    | 100.0  |
| P1         | 11,240  | 77.0    | 77.0   |
| P2         | 10,456  | 93.0    | 71.6   |
| P3         | 10,000  | 95.6    | 68.5   |
| P4         | 0       | 0.0     | 0.0    |
| P5         | 21      | 0.2     | 0.1    |
| P6         | 8,450   | 84.5    | 57.9   |
| P7         | 20      | 0.2     | 0.1    |
| P9         | 683     | 6.8     | 4.7    |

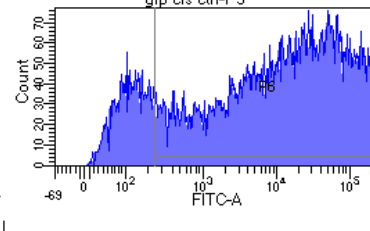

| Population | #Events | %Parent | %Total |
|------------|---------|---------|--------|
| All Events | 14,598  | ####    | 100.0  |
| P1         | 11,240  | 77.0    | 77.0   |
| P2         | 10,456  | 93.0    | 71.6   |
| P3         | 10,000  | 95.6    | 68.5   |
| P4         | 0       | 0.0     | 0.0    |
| P5         | 21      | 0.2     | 0.1    |
| P6         | 8,450   | 84.5    | 57.9   |
| P7         | 20      | 0.2     | 0.1    |
| P9         | 683     | 6.8     | 4.7    |

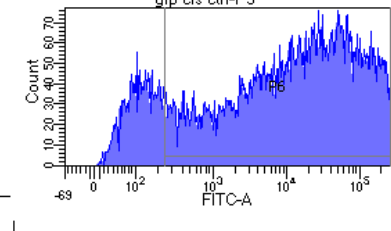

Specimen Name: Specimen\_001  
 Tube Name: gfp cis ctrl  
 Record Date: Apr 12, 2018 10:48:32 AM  
 SOP: LukeKoblan  
 GUID: fb348816-529e-4405-b102-e4...

Specimen Name: Specimen\_001  
 Tube Name: gfp cis ctrl  
 Record Date: Apr 12, 2018 10:48:32 AM  
 SOP: LukeKoblan  
 GUID: fb348816-529e-4405-b102-e4...

| Population | #Events | %Parent | FITC-A  |          | PE-Te... |        |
|------------|---------|---------|---------|----------|----------|--------|
|            |         |         | Mean    | Median   | Mean     | Median |
| All Events | 14,598  | ####    | 50,106  | 9,638    | 14       | 9      |
| P1         | 11,240  | 77.0    | 49,312  | 11,731   | 12       | 9      |
| P2         | 10,456  | 93.0    | 48,283  | 11,321   | 11       | 8      |
| P3         | 10,000  | 95.6    | 47,990  | 11,159   | 11       | 8      |
| P4         | 0       | 0.0     | ####    | ####     | ####     | ####   |
| P5         | 21      | 0.2     | 262,143 | 262,1... | 197      | 182    |
| P6         | 8,450   | 84.5    | 56,772  | 19,629   | 13       | 9      |
| P7         | 20      | 0.2     | 262,143 | 262,1... | 199      | 183    |
| P9         | 683     | 6.8     | 226,600 | 262,1... | 65       | 54     |

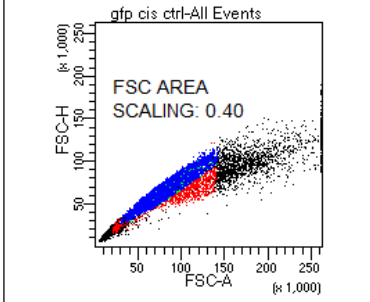

| Population | #Events | %Parent | FITC-A  |          | PE-Te... |        |
|------------|---------|---------|---------|----------|----------|--------|
|            |         |         | Mean    | Median   | Mean     | Median |
| All Events | 14,598  | ####    | 50,106  | 9,638    | 14       | 9      |
| P1         | 11,240  | 77.0    | 49,312  | 11,731   | 12       | 9      |
| P2         | 10,456  | 93.0    | 48,283  | 11,321   | 11       | 8      |
| P3         | 10,000  | 95.6    | 47,990  | 11,159   | 11       | 8      |
| P4         | 0       | 0.0     | ####    | ####     | ####     | ####   |
| P5         | 21      | 0.2     | 262,143 | 262,1... | 197      | 182    |
| P6         | 8,450   | 84.5    | 56,772  | 19,629   | 13       | 9      |
| P7         | 20      | 0.2     | 262,143 | 262,1... | 199      | 183    |
| P9         | 683     | 6.8     | 226,600 | 262,1... | 65       | 54     |

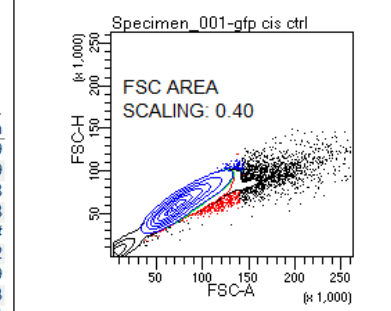

# HEK293T mCherry+ control

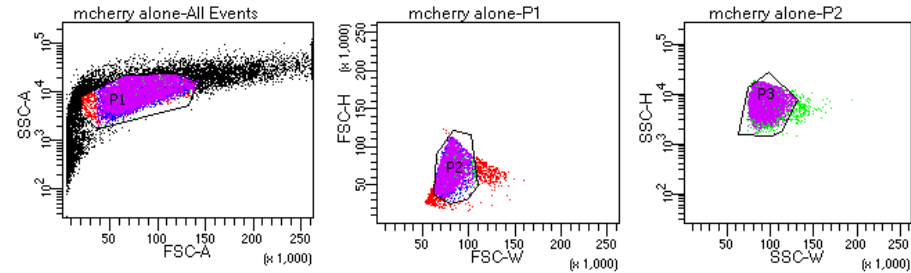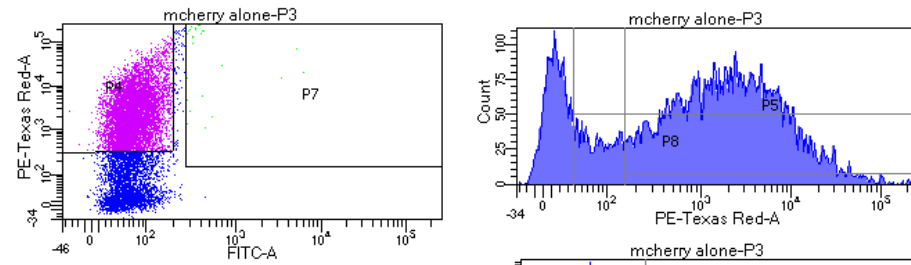

Tube: mcherry alone

| Population | #Events | %Parent | %Total |
|------------|---------|---------|--------|
| All Events | 17,180  | ####    | 100.0  |
| P1         | 11,197  | 65.2    | 65.2   |
| P2         | 10,563  | 94.3    | 61.5   |
| P3         | 10,390  | 98.4    | 60.5   |
| P4         | 6,646   | 64.0    | 38.7   |
| P5         | 7,531   | 72.5    | 43.8   |
| P6         | 42      | 0.4     | 0.2    |
| P7         | 26      | 0.3     | 0.2    |
| P8         | 8,560   | 82.4    | 49.8   |

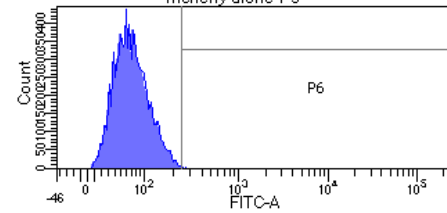

Tube Name: mcherry alone  
 Record Date: Mar 19, 2018 2:02:01 PM  
 SOP: LukeKoblan  
 GUID: 977feccd-14e1-4415-bb98-84a...

| Population | #Events | %Parent | FITC-A |        | PE-Te... |          |
|------------|---------|---------|--------|--------|----------|----------|
|            |         |         | Mean   | Median | Mean     | Median   |
| All Events | 17,180  | ####    | 96     | 67     | 6,908    | 851      |
| P1         | 11,197  | 65.2    | 72     | 62     | 4,392    | 883      |
| P2         | 10,563  | 94.3    | 72     | 62     | 4,514    | 912      |
| P3         | 10,390  | 98.4    | 71     | 62     | 4,491    | 911      |
| P4         | 6,646   | 64.0    | 73     | 66     | 5,847    | 2,357    |
| P5         | 7,531   | 72.5    | 76     | 66     | 6,182    | 1,992    |
| P6         | 42      | 0.4     | 640    | 292    | 107,971  | 97,344   |
| P7         | 26      | 0.3     | 870    | 338    | 110,834  | 115,7... |
| P8         | 8,560   | 82.4    | 74     | 64     | 5,419    | 1,515    |

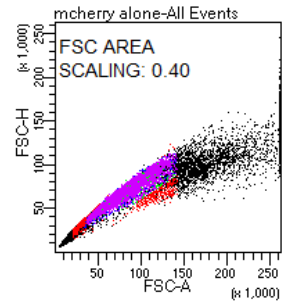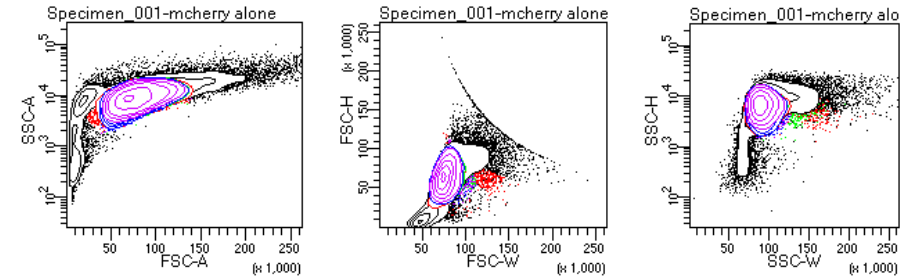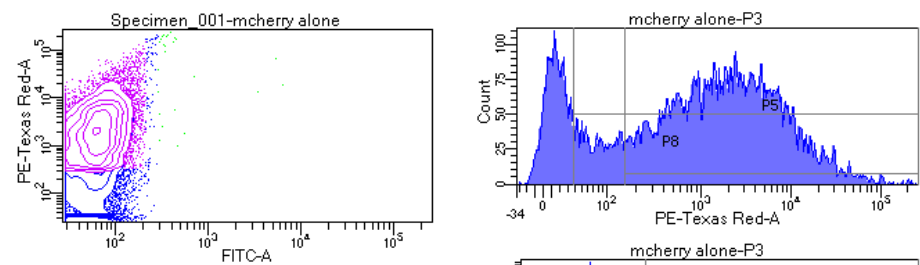

Tube: mcherry alone

| Population | #Events | %Parent | %Total |
|------------|---------|---------|--------|
| All Events | 17,180  | ####    | 100.0  |
| P1         | 11,197  | 65.2    | 65.2   |
| P2         | 10,563  | 94.3    | 61.5   |
| P3         | 10,390  | 98.4    | 60.5   |
| P4         | 6,646   | 64.0    | 38.7   |
| P5         | 7,531   | 72.5    | 43.8   |
| P6         | 42      | 0.4     | 0.2    |
| P7         | 26      | 0.3     | 0.2    |
| P8         | 8,560   | 82.4    | 49.8   |

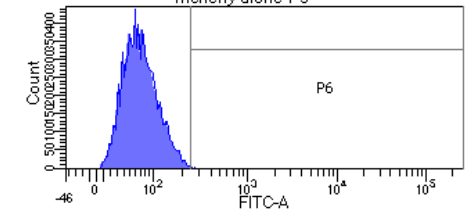

Tube Name: mcherry alone  
 Record Date: Mar 19, 2018 2:02:01 PM  
 SOP: LukeKoblan  
 GUID: 977feccd-14e1-4415-bb98-84a...

| Population | #Events | %Parent | FITC-A |        | FITC-A  |          | PE-Te... |        | PE-Te... |        |
|------------|---------|---------|--------|--------|---------|----------|----------|--------|----------|--------|
|            |         |         | Mean   | Median | Mean    | Median   | Mean     | Median | Mean     | Median |
| All Events | 17,180  | ####    | 96     | 67     | 6,908   | 851      |          |        |          |        |
| P1         | 11,197  | 65.2    | 72     | 62     | 4,392   | 883      |          |        |          |        |
| P2         | 10,563  | 94.3    | 72     | 62     | 4,514   | 912      |          |        |          |        |
| P3         | 10,390  | 98.4    | 71     | 62     | 4,491   | 911      |          |        |          |        |
| P4         | 6,646   | 64.0    | 73     | 66     | 5,847   | 2,357    |          |        |          |        |
| P5         | 7,531   | 72.5    | 76     | 66     | 6,182   | 1,992    |          |        |          |        |
| P6         | 42      | 0.4     | 640    | 292    | 107,971 | 97,344   |          |        |          |        |
| P7         | 26      | 0.3     | 870    | 338    | 110,834 | 115,7... |          |        |          |        |
| P8         | 8,560   | 82.4    | 74     | 64     | 5,419   | 1,515    |          |        |          |        |

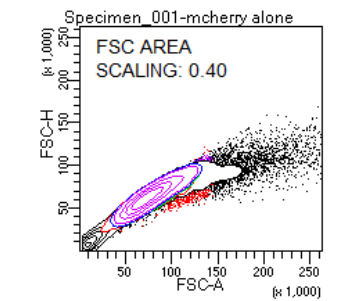

# Example HEK293T In trans sort

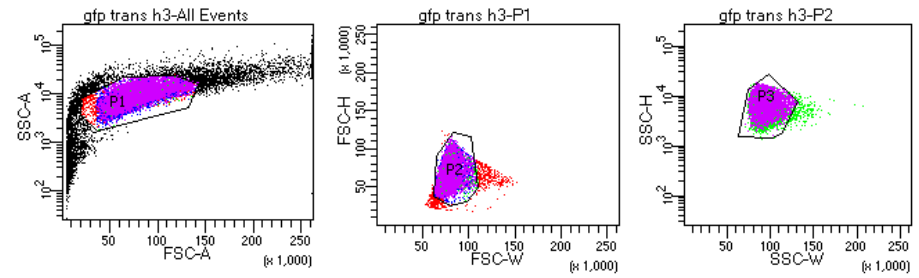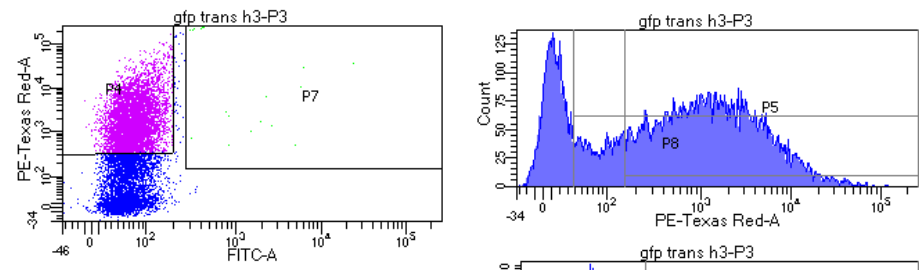

Tube: gfp trans h3

| Population | #Events | %Parent | %Total |
|------------|---------|---------|--------|
| All Events | 15,588  | ####    | 100.0  |
| P1         | 11,268  | 72.3    | 72.3   |
| P2         | 10,669  | 94.7    | 68.4   |
| P3         | 10,460  | 98.0    | 67.1   |
| P4         | 5,837   | 55.8    | 37.4   |
| P5         | 6,941   | 66.4    | 44.5   |
| P6         | 30      | 0.3     | 0.2    |
| P7         | 19      | 0.2     | 0.1    |
| P8         | 8,164   | 78.0    | 52.4   |

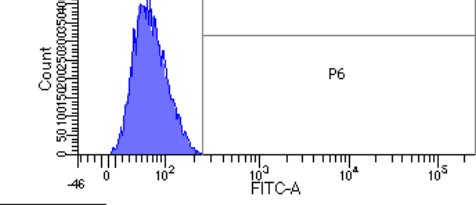

Tube Name: gfp trans h3  
 Record Date: Mar 19, 2018 1:17:30 PM  
 SOP: LukeKoblan  
 GUID: d81a576b-d2c7-4e21-b7e2-18...

| Population | #Events | %Parent | FITC-A Mean | FITC-A Median | PE-Te... Mean | PE-Te... Median |
|------------|---------|---------|-------------|---------------|---------------|-----------------|
| All Events | 15,588  | ####    | 85          | 61            | 3,973         | 481             |
| P1         | 11,268  | 72.3    | 71          | 59            | 2,570         | 498             |
| P2         | 10,669  | 94.7    | 71          | 59            | 2,609         | 504             |
| P3         | 10,460  | 98.0    | 70          | 58            | 2,596         | 499             |
| P4         | 5,837   | 55.8    | 71          | 64            | 4,043         | 1,676           |
| P5         | 6,941   | 66.4    | 78          | 63            | 3,893         | 1,287           |
| P6         | 30      | 0.3     | 1,890       | 346           | 71,452        | 7,517           |
| P7         | 19      | 0.2     | 2,822       | 797           | 87,750        | 10,404          |
| P8         | 8,164   | 78.0    | 75          | 62            | 3,291         | 943             |

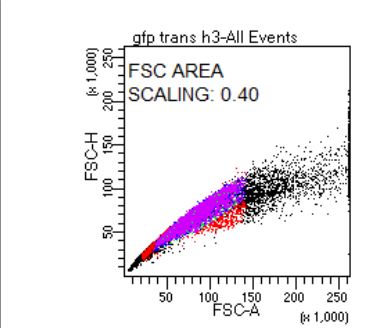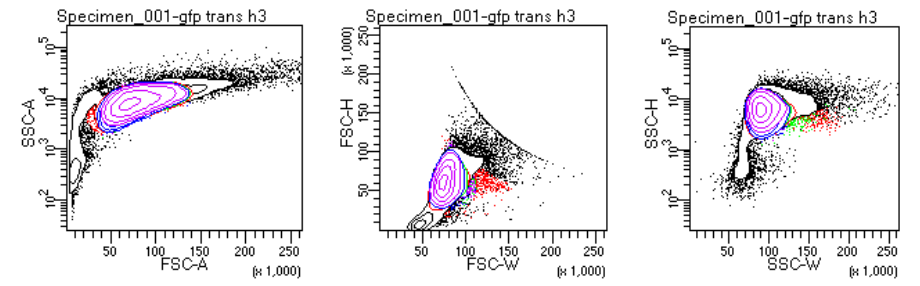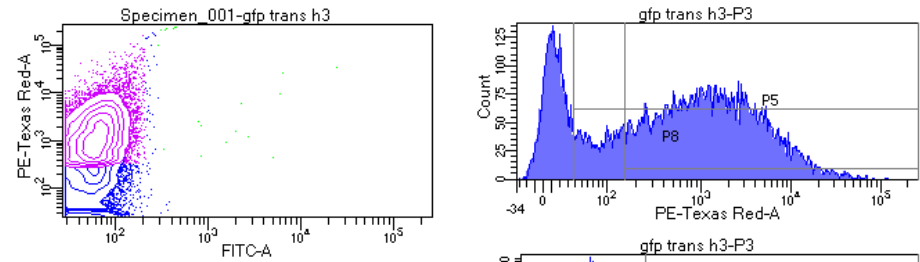

Tube: gfp trans h3

| Population | #Events | %Parent | %Total |
|------------|---------|---------|--------|
| All Events | 15,588  | ####    | 100.0  |
| P1         | 11,268  | 72.3    | 72.3   |
| P2         | 10,669  | 94.7    | 68.4   |
| P3         | 10,460  | 98.0    | 67.1   |
| P4         | 5,837   | 55.8    | 37.4   |
| P5         | 6,941   | 66.4    | 44.5   |
| P6         | 30      | 0.3     | 0.2    |
| P7         | 19      | 0.2     | 0.1    |
| P8         | 8,164   | 78.0    | 52.4   |

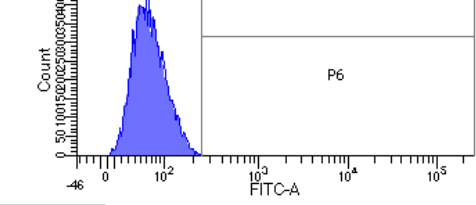

Tube Name: gfp trans h3  
 Record Date: Mar 19, 2018 1:17:30 PM  
 SOP: LukeKoblan  
 GUID: d81a576b-d2c7-4e21-b7e2-18...

| Population | #Events | %Parent | FITC-A Mean | FITC-A Median | PE-Te... Mean | PE-Te... Median |
|------------|---------|---------|-------------|---------------|---------------|-----------------|
| All Events | 15,588  | ####    | 85          | 61            | 3,973         | 481             |
| P1         | 11,268  | 72.3    | 71          | 59            | 2,570         | 498             |
| P2         | 10,669  | 94.7    | 71          | 59            | 2,609         | 504             |
| P3         | 10,460  | 98.0    | 70          | 58            | 2,596         | 499             |
| P4         | 5,837   | 55.8    | 71          | 64            | 4,043         | 1,676           |
| P5         | 6,941   | 66.4    | 78          | 63            | 3,893         | 1,287           |
| P6         | 30      | 0.3     | 1,890       | 346           | 71,452        | 7,517           |
| P7         | 19      | 0.2     | 2,822       | 797           | 87,750        | 10,404          |
| P8         | 8,164   | 78.0    | 75          | 62            | 3,291         | 943             |

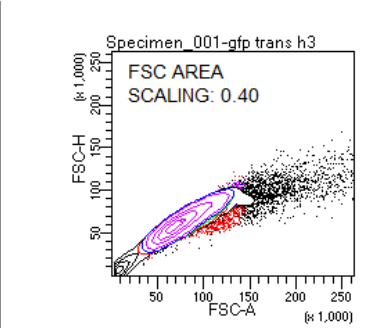

# Example HEK293T In cis sort

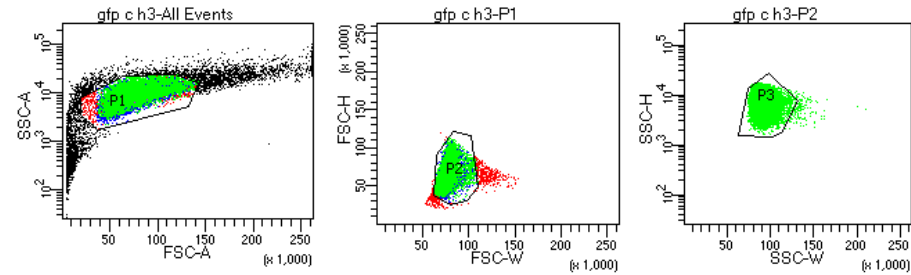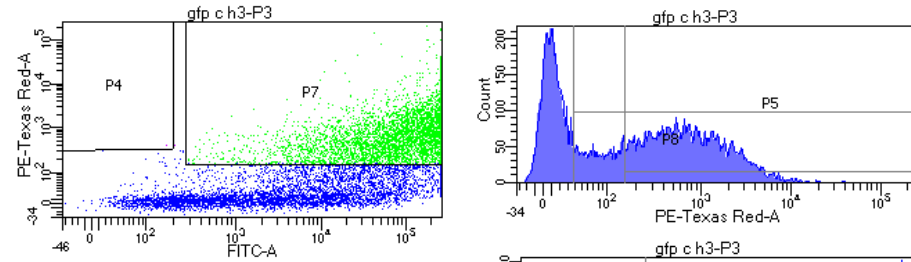

Tube: gfp c h3

| Population | #Events | %Parent | %Total |
|------------|---------|---------|--------|
| All Events | 14,735  | ####    | 100.0  |
| P1         | 11,037  | 74.9    | 74.9   |
| P2         | 10,483  | 95.0    | 71.1   |
| P3         | 10,319  | 98.4    | 70.0   |
| P4         | 2       | 0.0     | 0.0    |
| P5         | 5,410   | 52.4    | 36.7   |
| P6         | 9,579   | 92.8    | 65.0   |
| P7         | 5,361   | 52.0    | 36.4   |
| P8         | 6,820   | 66.1    | 46.3   |

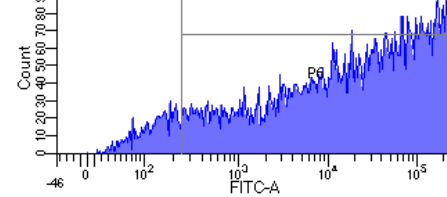

Tube Name: gfp c h3  
 Record Date: Mar 19, 2018 1:32:08 PM  
 SOP: LukeKoblan  
 GUID: 9133271f-c708-42c4-ae39-dfe...

| Population | #Events | %Parent | FIT-A Mean | FIT-A Median | PE-Te... Mean | PE-Te... Median |
|------------|---------|---------|------------|--------------|---------------|-----------------|
| All Events | 14,735  | ####    | 86,695     | 32,042       | 1,144         | 166             |
| P1         | 11,037  | 74.9    | 86,817     | 35,111       | 914           | 181             |
| P2         | 10,483  | 95.0    | 86,602     | 34,550       | 933           | 182             |
| P3         | 10,319  | 98.4    | 86,412     | 34,377       | 925           | 181             |
| P4         | 2       | 0.0     | 181        | 181          | 409           | 409             |
| P5         | 5,410   | 52.4    | 143,4...   | 137,6...     | 1,737         | 695             |
| P6         | 9,579   | 92.8    | 93,078     | 44,313       | 996           | 231             |
| P7         | 5,361   | 52.0    | 144.3...   | 140.5...     | 1,751         | 702             |
| P8         | 6,820   | 66.1    | 124.2...   | 99,742       | 1,396         | 489             |

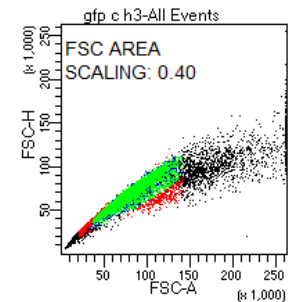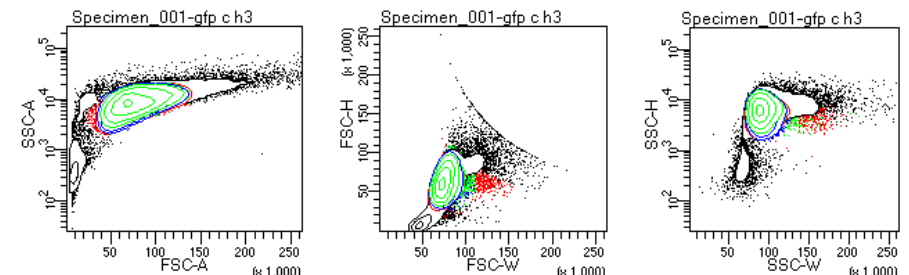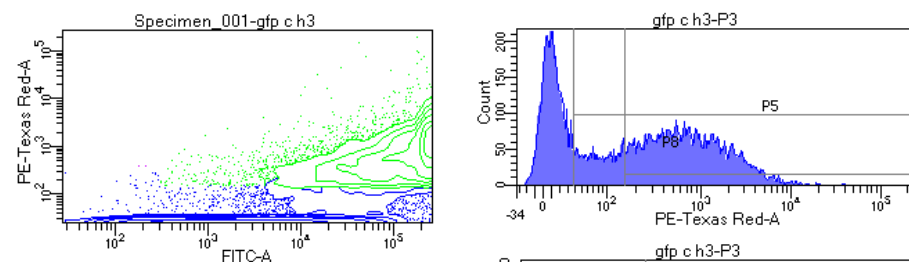

Tube: gfp c h3

| Population | #Events | %Parent | %Total |
|------------|---------|---------|--------|
| All Events | 14,735  | ####    | 100.0  |
| P1         | 11,037  | 74.9    | 74.9   |
| P2         | 10,483  | 95.0    | 71.1   |
| P3         | 10,319  | 98.4    | 70.0   |
| P4         | 2       | 0.0     | 0.0    |
| P5         | 5,410   | 52.4    | 36.7   |
| P6         | 9,579   | 92.8    | 65.0   |
| P7         | 5,361   | 52.0    | 36.4   |
| P8         | 6,820   | 66.1    | 46.3   |

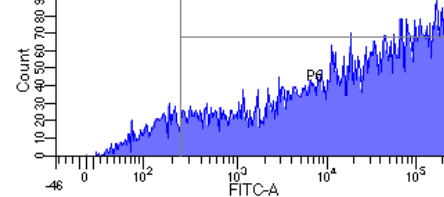

Tube Name: gfp c h3  
 Record Date: Mar 19, 2018 1:32:08 PM  
 SOP: LukeKoblan  
 GUID: 9133271f-c708-42c4-ae39-dfe...

| Population | #Events | %Parent | FIT-A Mean | FIT-A Median | PE-Te... Mean | PE-Te... Median |
|------------|---------|---------|------------|--------------|---------------|-----------------|
| All Events | 14,735  | ####    | 86,695     | 32,042       | 1,144         | 166             |
| P1         | 11,037  | 74.9    | 86,817     | 35,111       | 914           | 181             |
| P2         | 10,483  | 95.0    | 86,602     | 34,550       | 933           | 182             |
| P3         | 10,319  | 98.4    | 86,412     | 34,377       | 925           | 181             |
| P4         | 2       | 0.0     | 181        | 181          | 409           | 409             |
| P5         | 5,410   | 52.4    | 143,4...   | 137,6...     | 1,737         | 695             |
| P6         | 9,579   | 92.8    | 93,078     | 44,313       | 996           | 231             |
| P7         | 5,361   | 52.0    | 144.3...   | 140.5...     | 1,751         | 702             |
| P8         | 6,820   | 66.1    | 124.2...   | 99,742       | 1,396         | 489             |

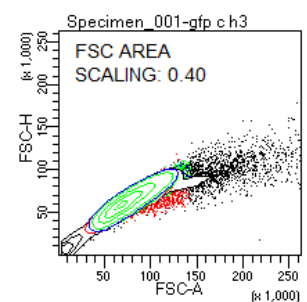

# Example HEK293T P2A sort (BE4-P2A-GFP)

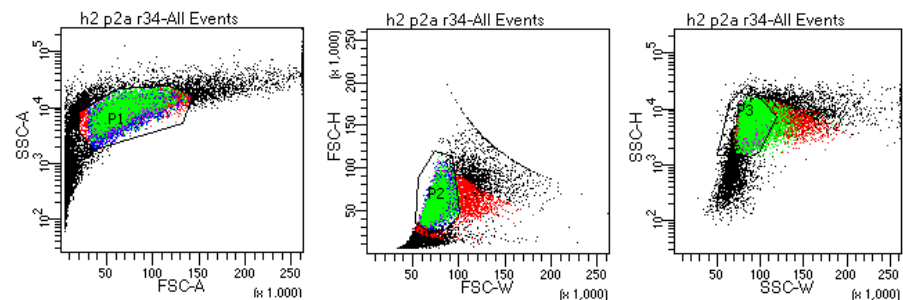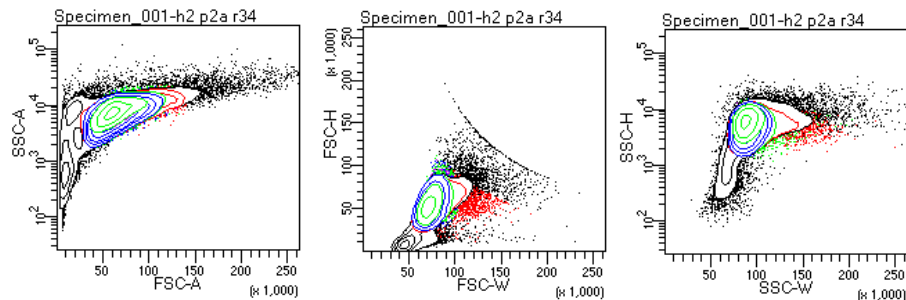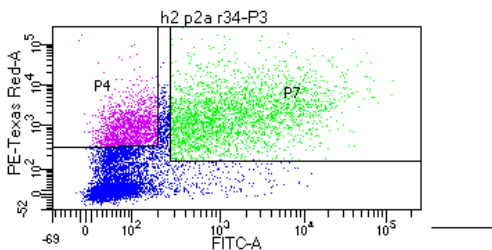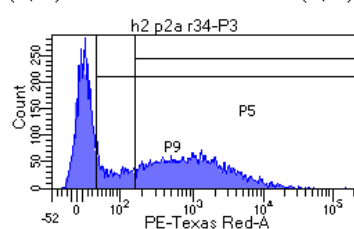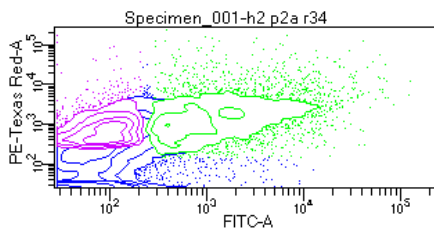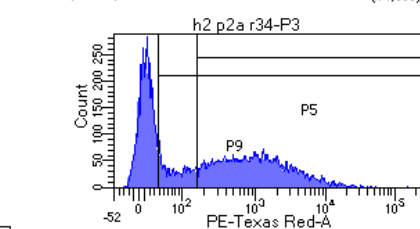

| Population | #Events | %Parent | %Total |
|------------|---------|---------|--------|
| All Events | 17,092  | ####    | 100.0  |
| P1         | 11,764  | 68.8    | 68.8   |
| P2         | 10,561  | 89.8    | 61.8   |
| P3         | 10,000  | 94.7    | 58.5   |
| P4         | 1,567   | 15.7    | 9.2    |
| P5         | 5,114   | 51.1    | 29.9   |
| P6         | 2,831   | 28.3    | 16.6   |
| P7         | 2,483   | 24.8    | 14.5   |
| P9         | 6,196   | 62.0    | 36.3   |

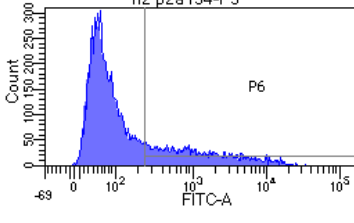

| Population | #Events | %Parent | %Total |
|------------|---------|---------|--------|
| All Events | 17,092  | ####    | 100.0  |
| P1         | 11,764  | 68.8    | 68.8   |
| P2         | 10,561  | 89.8    | 61.8   |
| P3         | 10,000  | 94.7    | 58.5   |
| P4         | 1,567   | 15.7    | 9.2    |
| P5         | 5,114   | 51.1    | 29.9   |
| P6         | 2,831   | 28.3    | 16.6   |
| P7         | 2,483   | 24.8    | 14.5   |
| P9         | 6,196   | 62.0    | 36.3   |

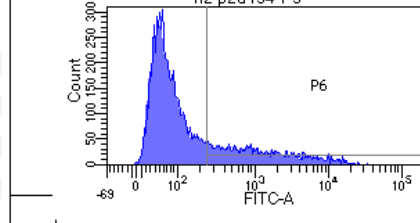

Specimen Name: Specimen\_001  
 Tube Name: h2 p2a r34  
 Record Date: Apr 12, 2018 10:25:17 AM  
 SOP: LukeKoblan  
 GUID: 406facf6-8959-41cf-a833-d202...

| Population | #Events | %Parent | FITC-A |        | PE-Te... |        |
|------------|---------|---------|--------|--------|----------|--------|
|            |         |         | Mean   | Median | Mean     | Median |
| All Events | 17,092  | ####    | 1.165  | 83     | 1.973    | 109    |
| P1         | 11,764  | 68.8    | 1.092  | 91     | 1.763    | 192    |
| P2         | 10,561  | 89.8    | 1.058  | 83     | 1.773    | 177    |
| P3         | 10,000  | 94.7    | 1.057  | 81     | 1.713    | 174    |
| P4         | 1,567   | 15.7    | 95     | 89     | 1.907    | 838    |
| P5         | 5,114   | 51.1    | 1.954  | 246    | 3.326    | 951    |
| P6         | 2,831   | 28.3    | 3.554  | 1,100  | 4.753    | 1,505  |
| P7         | 2,483   | 24.8    | 3.912  | 1,285  | 5.353    | 1,799  |
| P9         | 6,196   | 62.0    | 1.656  | 178    | 2.760    | 670    |

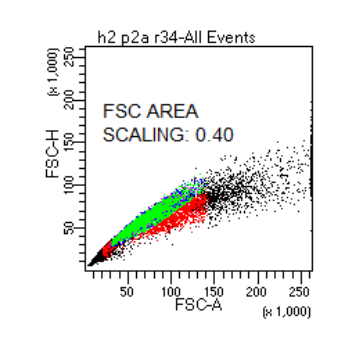

Specimen Name: Specimen\_001  
 Tube Name: h2 p2a r34  
 Record Date: Apr 12, 2018 10:25:17 AM  
 SOP: LukeKoblan  
 GUID: 406facf6-8959-41cf-a833-d202...

| Population | #Events | %Parent | FITC-A |        | PE-Te... |        |
|------------|---------|---------|--------|--------|----------|--------|
|            |         |         | Mean   | Median | Mean     | Median |
| All Events | 17,092  | ####    | 1.165  | 83     | 1.973    | 109    |
| P1         | 11,764  | 68.8    | 1.092  | 91     | 1.763    | 192    |
| P2         | 10,561  | 89.8    | 1.058  | 83     | 1.773    | 177    |
| P3         | 10,000  | 94.7    | 1.057  | 81     | 1.713    | 174    |
| P4         | 1,567   | 15.7    | 95     | 89     | 1.907    | 838    |
| P5         | 5,114   | 51.1    | 1.954  | 246    | 3.326    | 951    |
| P6         | 2,831   | 28.3    | 3.554  | 1,100  | 4.753    | 1,505  |
| P7         | 2,483   | 24.8    | 3.912  | 1,285  | 5.353    | 1,799  |
| P9         | 6,196   | 62.0    | 1.656  | 178    | 2.760    | 670    |

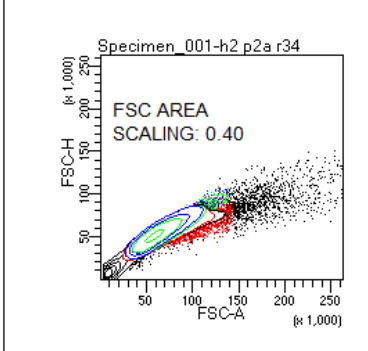



# Example HEK293T P2A sort (BE4max-P2A-GFP)

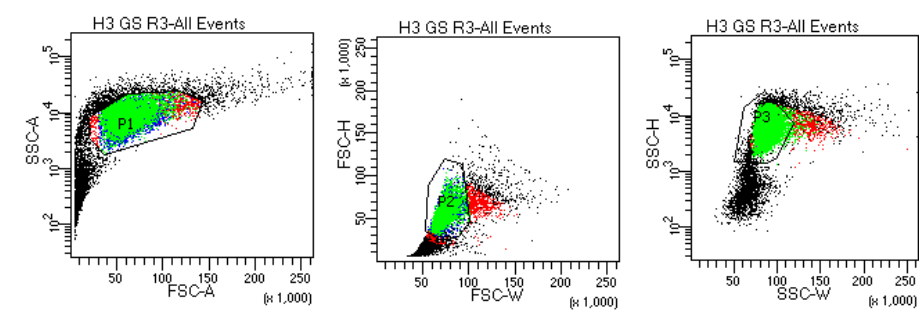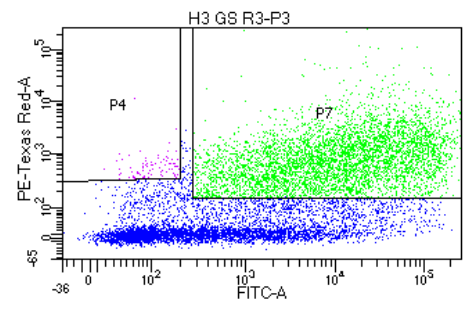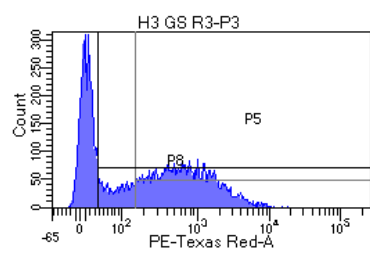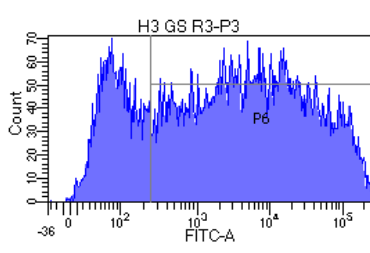

Experiment Name: 180420  
 Specimen Name: Specimen\_001  
 Tube Name: H3 GS R3  
 Record Date: Apr 20, 2018 11:14:41 AM  
 SOP: LukeKoblan  
 GUID: 06372c9c-a79c-40f4-82aa-...

| Population | #Eve... | %Par... | FITC-A Mean | FITC-A Medi... | PE-T... Mean | PE-T... Medi... |
|------------|---------|---------|-------------|----------------|--------------|-----------------|
| All Events | 14,707  | ####    | 18,485      | 1,772          | 992          | 108             |
| P1         | 10,809  | 73.5    | 17,989      | 2,481          | 951          | 177             |
| P2         | 10,179  | 94.2    | 17,596      | 2,339          | 919          | 171             |
| P3         | 10,000  | 98.2    | 17,333      | 2,290          | 908          | 167             |
| P4         | 88      | 0.9     | 109         | 99             | 732          | 530             |
| P5         | 5,116   | 51.2    | 29,310      | 9,845          | 1,697        | 671             |
| P6         | 7,530   | 75.3    | 22,987      | 5,866          | 1,187        | 339             |
| P7         | 4,814   | 48.1    | 31,062      | 11,613         | 1,831        | 715             |
| P8         | 6,296   | 63.0    | 26,092      | 7,690          | 1,438        | 497             |

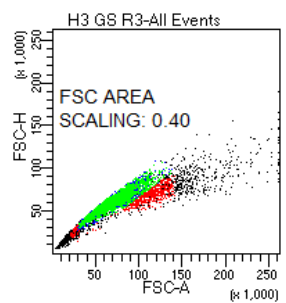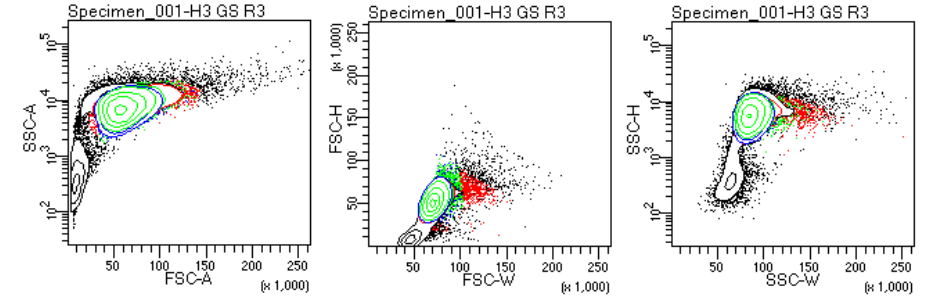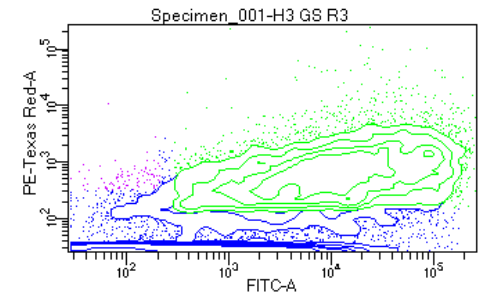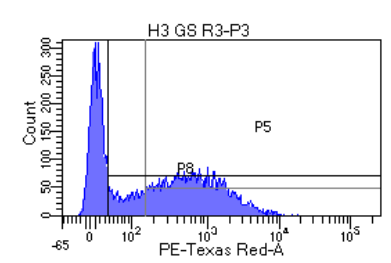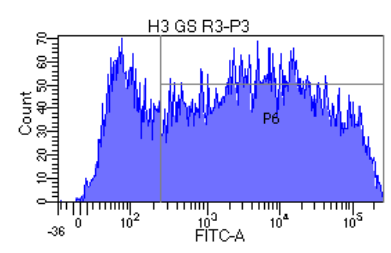

Experiment Name: 180420  
 Specimen Name: Specimen\_001  
 Tube Name: H3 GS R3  
 Record Date: Apr 20, 2018 11:14:41 AM  
 SOP: LukeKoblan  
 GUID: 06372c9c-a79c-40f4-82aa-...

| Population | #Eve... | %Par... | FITC-A Mean | FITC-A Medi... | PE-T... Mean | PE-T... Medi... |
|------------|---------|---------|-------------|----------------|--------------|-----------------|
| All Events | 14,707  | ####    | 18,485      | 1,772          | 992          | 108             |
| P1         | 10,809  | 73.5    | 17,989      | 2,481          | 951          | 177             |
| P2         | 10,179  | 94.2    | 17,596      | 2,339          | 919          | 171             |
| P3         | 10,000  | 98.2    | 17,333      | 2,290          | 908          | 167             |
| P4         | 88      | 0.9     | 109         | 99             | 732          | 530             |
| P5         | 5,116   | 51.2    | 29,310      | 9,845          | 1,697        | 671             |
| P6         | 7,530   | 75.3    | 22,987      | 5,866          | 1,187        | 339             |
| P7         | 4,814   | 48.1    | 31,062      | 11,613         | 1,831        | 715             |
| P8         | 6,296   | 63.0    | 26,092      | 7,690          | 1,438        | 497             |

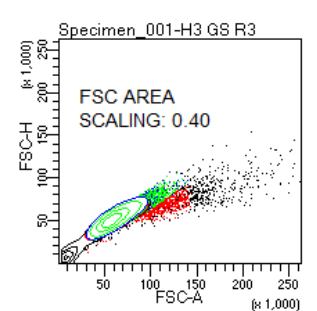



# Example HEK293T P2A sort (AncBE4max-P2A-GFP)

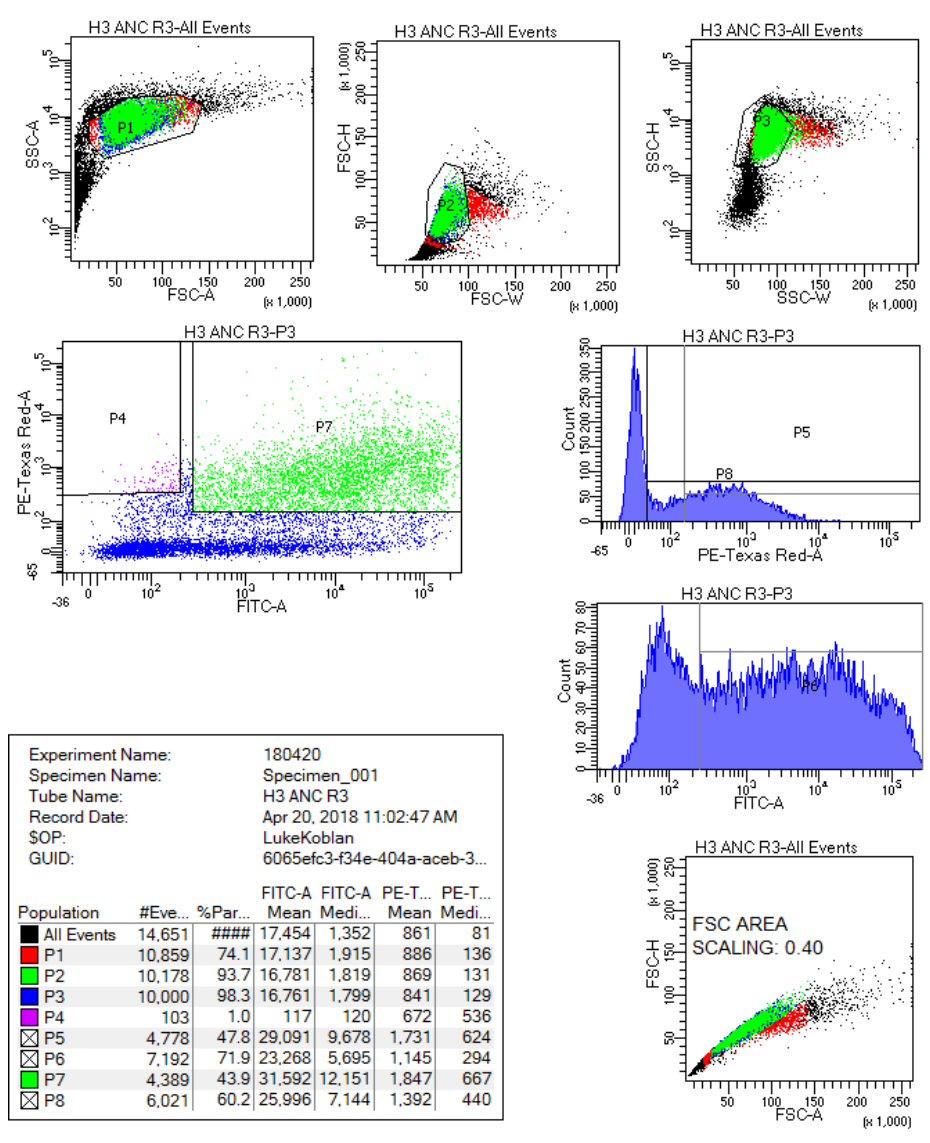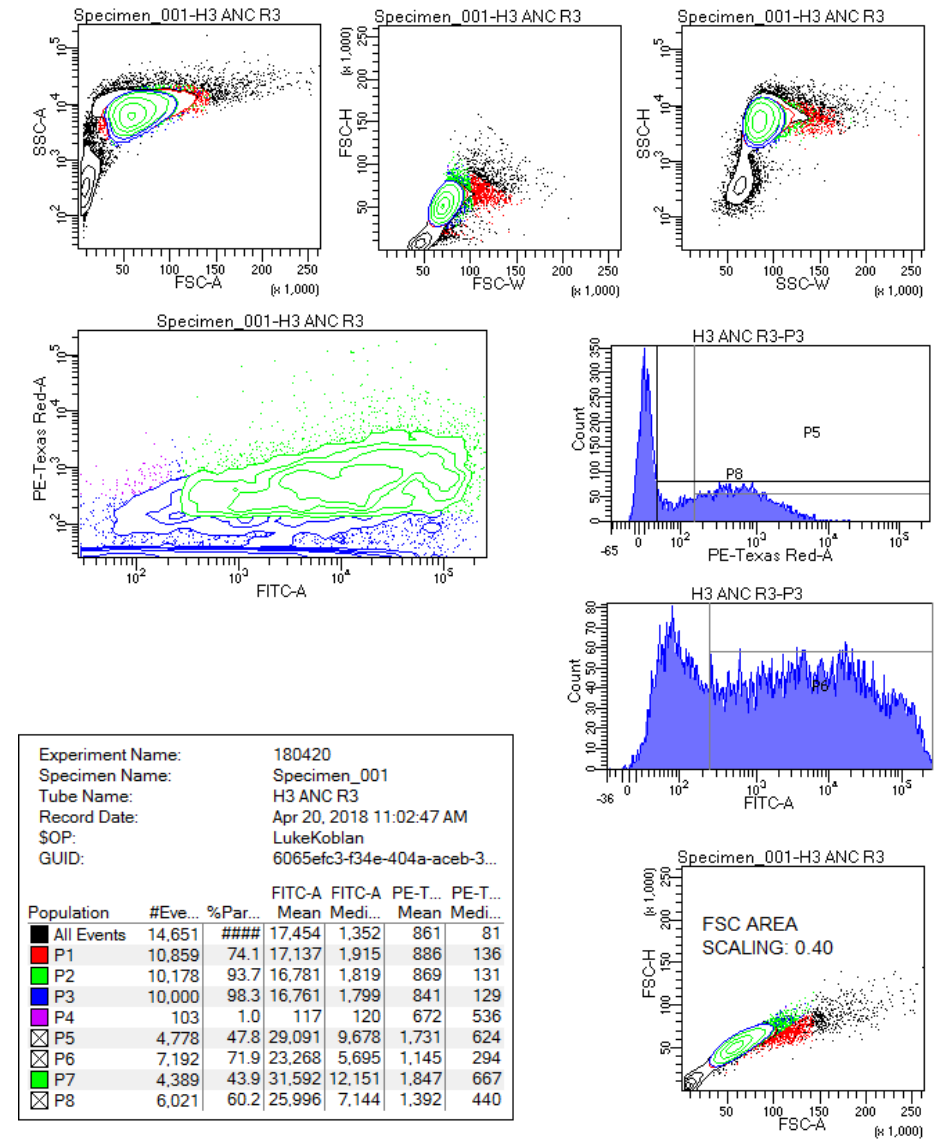

Figure 2 Flow Sorting  
Controls  
N2a cells  
SCN9a sites 1 and 2

# N2A negative control

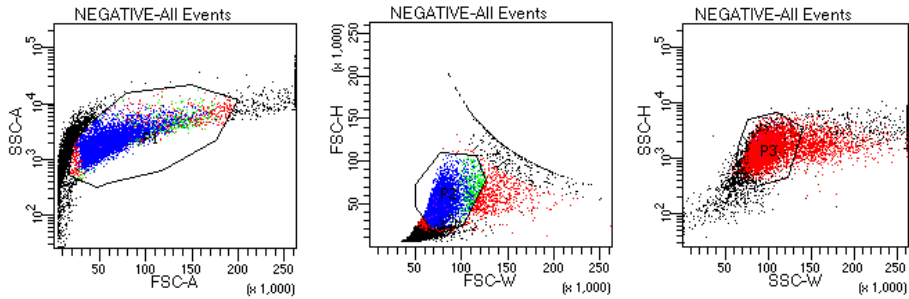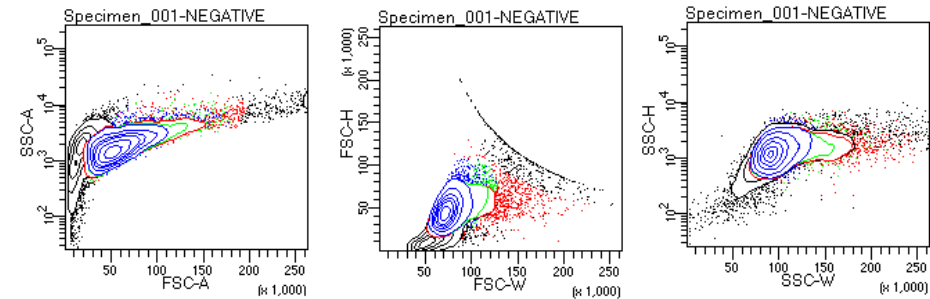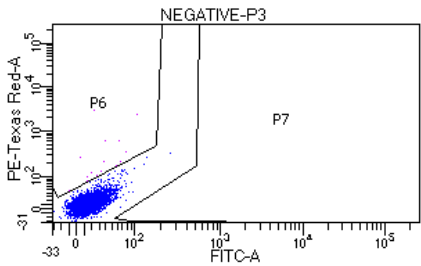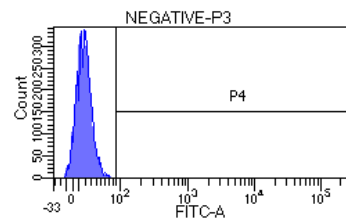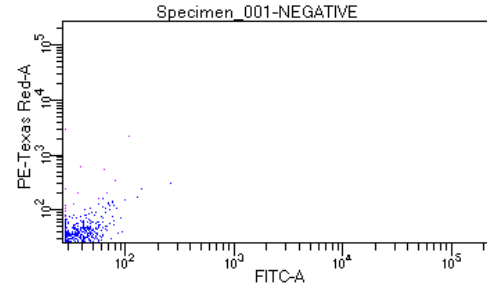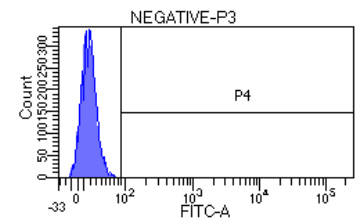

Experiment Name: 042418\_N2A  
 Specimen Name: Specimen\_001  
 Tube Name: NEGATIVE  
 Record Date: Apr 24, 2018 11:17:02 AM  
 SOP: LukeKoblan  
 GUID: b7d02261-40fb-49e0-8168-c67f...

| Population | #Events | %Parent | FITC-A Mean | FITC-A Median | PE-Te... Mean | PE-Te... Median |
|------------|---------|---------|-------------|---------------|---------------|-----------------|
| All Events | 9,023   | ####    | 20          | 13            | 22            | 13              |
| P1         | 6,324   | 70.1    | 17          | 15            | 18            | 13              |
| P2         | 5,556   | 87.9    | 15          | 14            | 16            | 12              |
| P3         | 5,149   | 92.7    | 14          | 13            | 15            | 12              |
| P4         | 7       | 0.1     | 125         | 104           | 491           | 182             |
| P5         | 45      | 0.9     | 59          | 57            | 273           | 125             |
| P6         | 15      | 0.3     | 36          | 31            | 566           | 208             |
| P7         | 0       | 0.0     | ####        | ####          | ####          | ####            |

Specimen Name: Specimen\_001  
 Tube Name: NEGATIVE  
 Record Date: Apr 24, 2018 11:17:02 AM  
 SOP: LukeKoblan  
 GUID: b7d02261-40fb-49e0-8168-c67f...

| Population | #Events | %Parent | FITC-A Mean | FITC-A Median | PE-Te... Mean | PE-Te... Median |
|------------|---------|---------|-------------|---------------|---------------|-----------------|
| All Events | 9,023   | ####    | 20          | 13            | 22            | 13              |
| P1         | 6,324   | 70.1    | 17          | 15            | 18            | 13              |
| P2         | 5,556   | 87.9    | 15          | 14            | 16            | 12              |
| P3         | 5,149   | 92.7    | 14          | 13            | 15            | 12              |
| P4         | 7       | 0.1     | 125         | 104           | 491           | 182             |
| P5         | 45      | 0.9     | 59          | 57            | 273           | 125             |
| P6         | 15      | 0.3     | 36          | 31            | 566           | 208             |
| P7         | 0       | 0.0     | ####        | ####          | ####          | ####            |

Tube: NEGATIVE

| Population | #Events | %Parent | %Total |
|------------|---------|---------|--------|
| All Events | 9,023   | ####    | 100.0  |
| P1         | 6,324   | 70.1    | 70.1   |
| P2         | 5,556   | 87.9    | 61.6   |
| P3         | 5,149   | 92.7    | 57.1   |
| P4         | 7       | 0.1     | 0.1    |
| P5         | 45      | 0.9     | 0.5    |
| P6         | 15      | 0.3     | 0.2    |
| P7         | 0       | 0.0     | 0.0    |

Tube: NEGATIVE

| Population | #Events | %Parent | %Total |
|------------|---------|---------|--------|
| All Events | 9,023   | ####    | 100.0  |
| P1         | 6,324   | 70.1    | 70.1   |
| P2         | 5,556   | 87.9    | 61.6   |
| P3         | 5,149   | 92.7    | 57.1   |
| P4         | 7       | 0.1     | 0.1    |
| P5         | 45      | 0.9     | 0.5    |
| P6         | 15      | 0.3     | 0.2    |
| P7         | 0       | 0.0     | 0.0    |

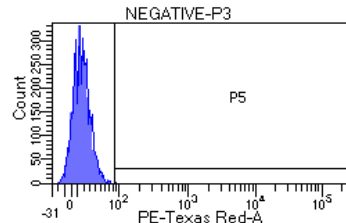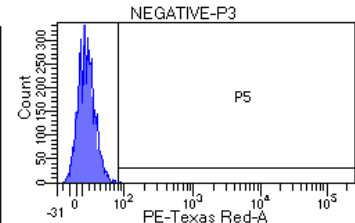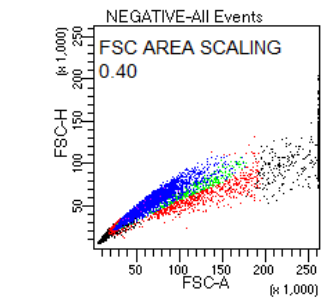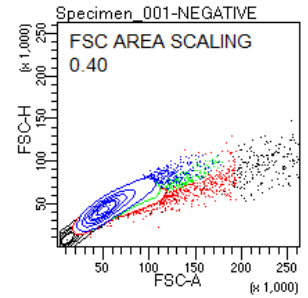

# N2A GFP+ control

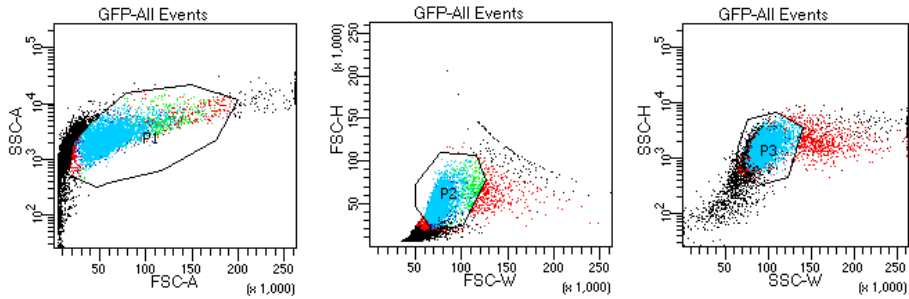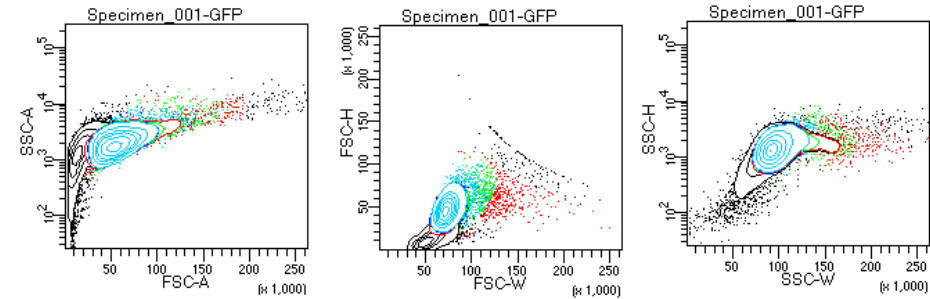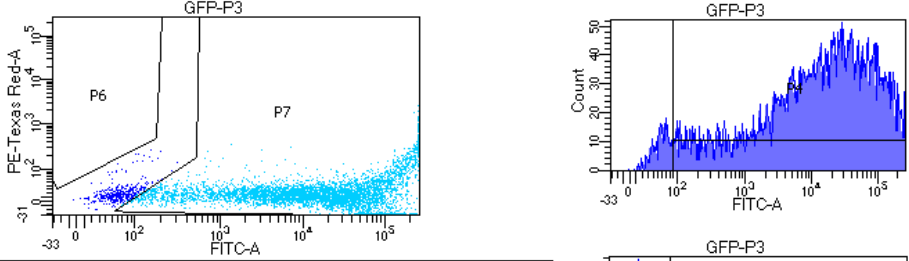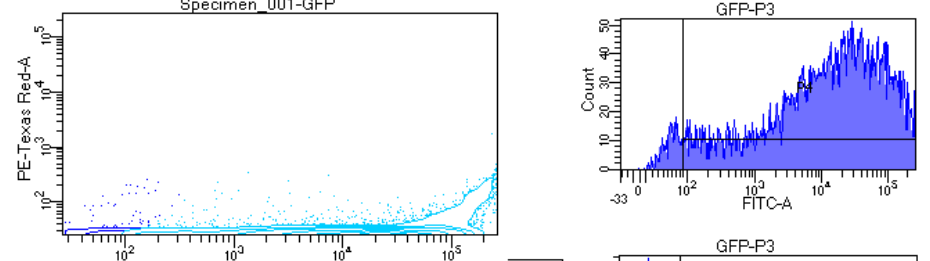

Experiment Name: 042418\_N2A  
 Specimen Name: Specimen\_001  
 Tube Name: GFP  
 Record Date: Apr 24, 2018 11:14:28 AM  
 SOP: LukeKoblan  
 GUID: 71886982-1736-492c-a11d-9ea...

| Population | #Events | %Parent | FITC-A Mean | FITC-A Median | PE-Te... Mean | PE-Te... Median |
|------------|---------|---------|-------------|---------------|---------------|-----------------|
| All Events | 8,898   | ####    | 33,745      | 5,144         | 43            | 16              |
| P1         | 6,175   | 69.4    | 43,708      | 15,211        | 41            | 16              |
| P2         | 5,637   | 91.3    | 41,561      | 14,586        | 36            | 16              |
| P3         | 5,328   | 94.5    | 39,705      | 13,750        | 32            | 15              |
| P4         | 5,052   | 94.8    | 41,871      | 16,006        | 33            | 15              |
| P5         | 378     | 7.1     | 174,667     | 193,956       | 264           | 158             |
| P6         | 0       | 0.0     | ####        | ####          | ####          | ####            |
| P7         | 4,968   | 93.2    | 42,577      | 16,692        | 32            | 15              |

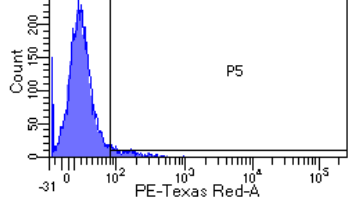

Specimen Name: Specimen\_001  
 Tube Name: GFP  
 Record Date: Apr 24, 2018 11:14:28 AM  
 SOP: LukeKoblan  
 GUID: 71886982-1736-492c-a11d-9ea...

| Population | #Events | %Parent | FITC-A Mean | FITC-A Median | PE-Te... Mean | PE-Te... Median |
|------------|---------|---------|-------------|---------------|---------------|-----------------|
| All Events | 8,898   | ####    | 33,745      | 5,144         | 43            | 16              |
| P1         | 6,175   | 69.4    | 43,708      | 15,211        | 41            | 16              |
| P2         | 5,637   | 91.3    | 41,561      | 14,586        | 36            | 16              |
| P3         | 5,328   | 94.5    | 39,705      | 13,750        | 32            | 15              |
| P4         | 5,052   | 94.8    | 41,871      | 16,006        | 33            | 15              |
| P5         | 378     | 7.1     | 174,667     | 193,956       | 264           | 158             |
| P6         | 0       | 0.0     | ####        | ####          | ####          | ####            |
| P7         | 4,968   | 93.2    | 42,577      | 16,692        | 32            | 15              |

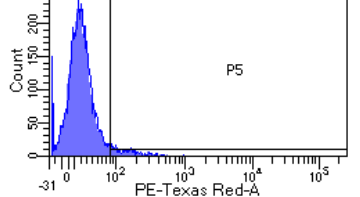

Tube: GFP

| Population | #Events | %Parent | %Total |
|------------|---------|---------|--------|
| All Events | 8,898   | ####    | 100.0  |
| P1         | 6,175   | 69.4    | 69.4   |
| P2         | 5,637   | 91.3    | 63.4   |
| P3         | 5,328   | 94.5    | 59.9   |
| P4         | 5,052   | 94.8    | 56.8   |
| P5         | 378     | 7.1     | 4.2    |
| P6         | 0       | 0.0     | 0.0    |
| P7         | 4,968   | 93.2    | 55.8   |

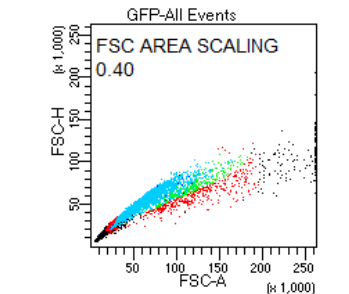

Tube: GFP

| Population | #Events | %Parent | %Total |
|------------|---------|---------|--------|
| All Events | 8,898   | ####    | 100.0  |
| P1         | 6,175   | 69.4    | 69.4   |
| P2         | 5,637   | 91.3    | 63.4   |
| P3         | 5,328   | 94.5    | 59.9   |
| P4         | 5,052   | 94.8    | 56.8   |
| P5         | 378     | 7.1     | 4.2    |
| P6         | 0       | 0.0     | 0.0    |
| P7         | 4,968   | 93.2    | 55.8   |

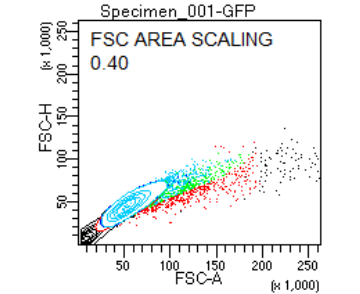

# N2A mCherry+ control

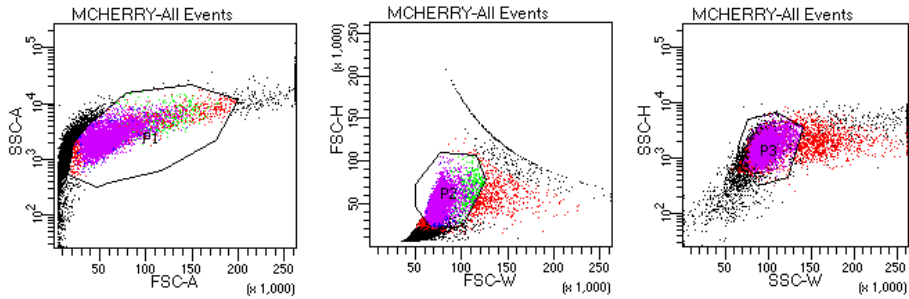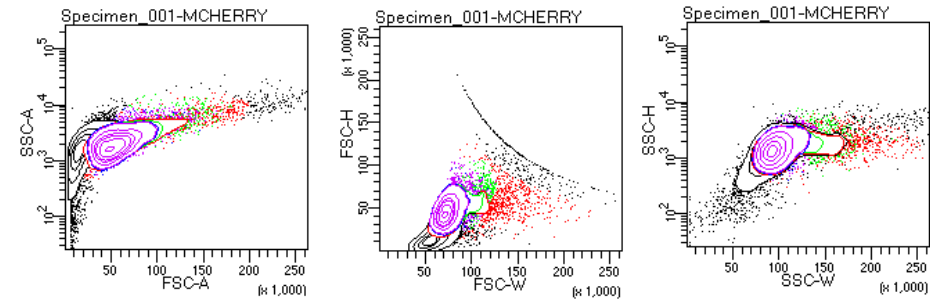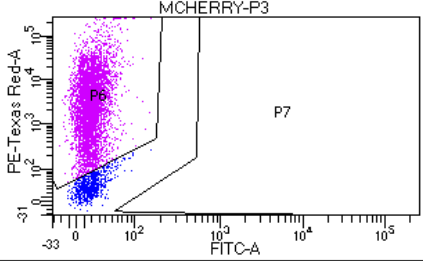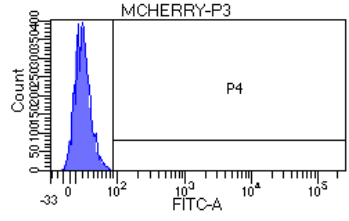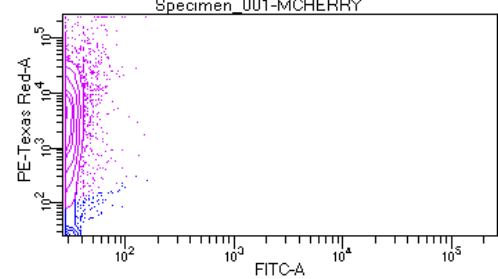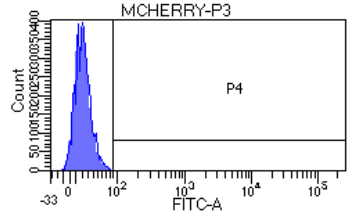

Experiment Name: 042418\_N2A  
 Specimen Name: Specimen\_001  
 Tube Name: MCHERRY  
 Record Date: Apr 24, 2018 11:12:49 AM  
 SOP: LukeKoblan  
 GUID: 9c2cfb38-9303-433f-b26d-5e64...

| Population | #Events | %Parent | FITC-A Mean | FITC-A Median | PE-Te... Mean | PE-Te... Median |
|------------|---------|---------|-------------|---------------|---------------|-----------------|
| All Events | 10,525  | ####    | 23          | 17            | 8,124         | 1,038           |
| P1         | 7,282   | 69.2    | 21          | 17            | 9,337         | 2,545           |
| P2         | 6,515   | 89.5    | 19          | 17            | 9,031         | 2,451           |
| P3         | 6,094   | 93.5    | 18          | 16            | 8,537         | 2,312           |
| P4         | 20      | 0.3     | 105         | 93            | 45,317        | 1,402           |
| P5         | 5,365   | 88.0    | 18          | 16            | 9,692         | 3,078           |
| P6         | 5,314   | 87.2    | 18          | 16            | 9,784         | 3,144           |
| P7         | 0       | 0.0     | ####        | ####          | ####          | ####            |

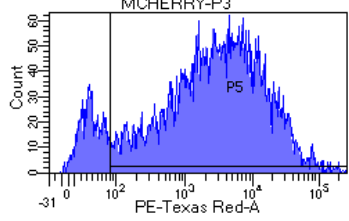

Specimen Name: Specimen\_001  
 Tube Name: MCHERRY  
 Record Date: Apr 24, 2018 11:12:49 AM  
 SOP: LukeKoblan  
 GUID: 9c2cfb38-9303-433f-b26d-5e64...

| Population | #Events | %Parent | FITC-A Mean | FITC-A Median | PE-Te... Mean | PE-Te... Median |
|------------|---------|---------|-------------|---------------|---------------|-----------------|
| All Events | 10,525  | ####    | 23          | 17            | 8,124         | 1,038           |
| P1         | 7,282   | 69.2    | 21          | 17            | 9,337         | 2,545           |
| P2         | 6,515   | 89.5    | 19          | 17            | 9,031         | 2,451           |
| P3         | 6,094   | 93.5    | 18          | 16            | 8,537         | 2,312           |
| P4         | 20      | 0.3     | 105         | 93            | 45,317        | 1,402           |
| P5         | 5,365   | 88.0    | 18          | 16            | 9,692         | 3,078           |
| P6         | 5,314   | 87.2    | 18          | 16            | 9,784         | 3,144           |
| P7         | 0       | 0.0     | ####        | ####          | ####          | ####            |

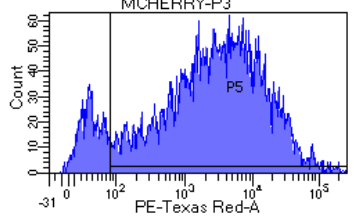

Tube: MCHERRY

| Population | #Events | %Parent | %Total |
|------------|---------|---------|--------|
| All Events | 10,525  | ####    | 100.0  |
| P1         | 7,282   | 69.2    | 69.2   |
| P2         | 6,515   | 89.5    | 61.9   |
| P3         | 6,094   | 93.5    | 57.9   |
| P4         | 20      | 0.3     | 0.2    |
| P5         | 5,365   | 88.0    | 51.0   |
| P6         | 5,314   | 87.2    | 50.5   |
| P7         | 0       | 0.0     | 0.0    |

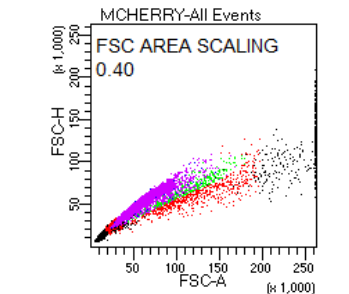

Tube: MCHERRY

| Population | #Events | %Parent | %Total |
|------------|---------|---------|--------|
| All Events | 10,525  | ####    | 100.0  |
| P1         | 7,282   | 69.2    | 69.2   |
| P2         | 6,515   | 89.5    | 61.9   |
| P3         | 6,094   | 93.5    | 57.9   |
| P4         | 20      | 0.3     | 0.2    |
| P5         | 5,365   | 88.0    | 51.0   |
| P6         | 5,314   | 87.2    | 50.5   |
| P7         | 0       | 0.0     | 0.0    |

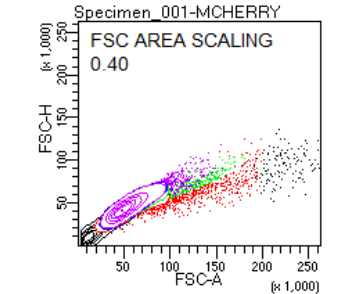

# Example N2A BE4 mCherry In trans sort

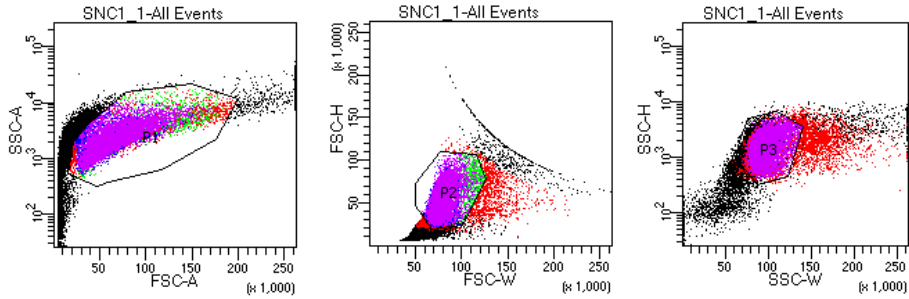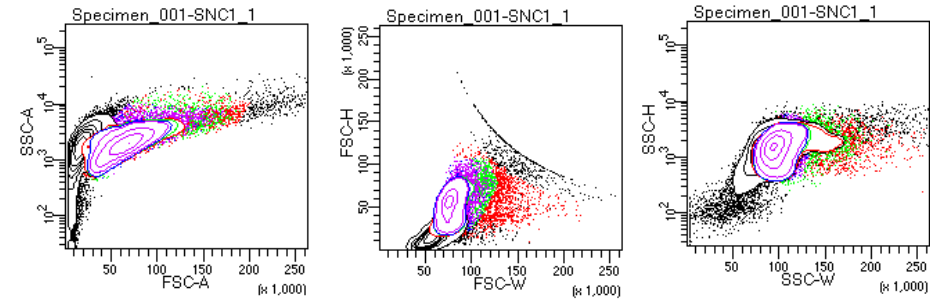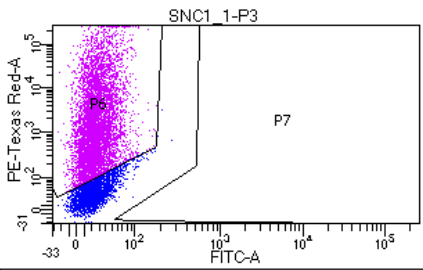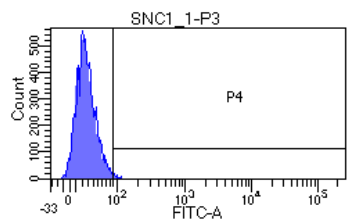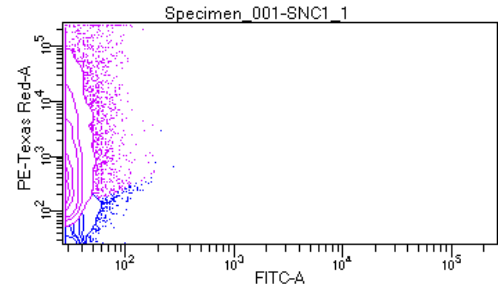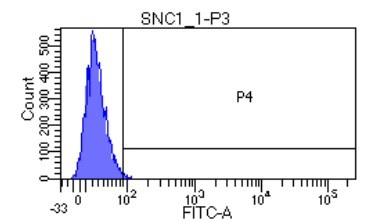

Experiment Name: 042418\_N2A  
 Specimen Name: Specimen\_001  
 Tube Name: SNC1\_1  
 Record Date: Apr 24, 2018 11:20:40 AM  
 SOP: LukeKoblan  
 GUID: 866238de-a50d-4a74-b8f9-564...

| Population | #Events | %Parent | FITC-A Mean | FITC-A Median | PE-Te... Mean | PE-Te... Median |
|------------|---------|---------|-------------|---------------|---------------|-----------------|
| All Events | 22,633  | ####    | 30          | 22            | 5,149         | 109             |
| P1         | 12,267  | 54.2    | 29          | 23            | 8,096         | 358             |
| P2         | 10,818  | 88.2    | 26          | 21            | 8,167         | 355             |
| P3         | 10,000  | 92.4    | 24          | 21            | 7,843         | 328             |
| P4         | 129     | 1.3     | 107         | 98            | 29,002        | 534             |
| P5         | 7,074   | 70.7    | 27          | 23            | 11,074        | 900             |
| P6         | 6,724   | 67.2    | 25          | 22            | 11,643        | 1,031           |
| P7         | 0       | 0.0     | ####        | ####          | ####          | ####            |

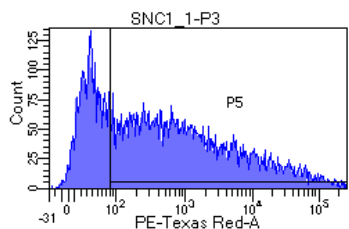

Specimen Name: Specimen\_001  
 Tube Name: SNC1\_1  
 Record Date: Apr 24, 2018 11:20:40 AM  
 SOP: LukeKoblan  
 GUID: 866238de-a50d-4a74-b8f9-564...

| Population | #Events | %Parent | FITC-A Mean | FITC-A Median | PE-Te... Mean | PE-Te... Median |
|------------|---------|---------|-------------|---------------|---------------|-----------------|
| All Events | 22,633  | ####    | 30          | 22            | 5,149         | 109             |
| P1         | 12,267  | 54.2    | 29          | 23            | 8,096         | 358             |
| P2         | 10,818  | 88.2    | 26          | 21            | 8,167         | 355             |
| P3         | 10,000  | 92.4    | 24          | 21            | 7,843         | 328             |
| P4         | 129     | 1.3     | 107         | 98            | 29,002        | 534             |
| P5         | 7,074   | 70.7    | 27          | 23            | 11,074        | 900             |
| P6         | 6,724   | 67.2    | 25          | 22            | 11,643        | 1,031           |
| P7         | 0       | 0.0     | ####        | ####          | ####          | ####            |

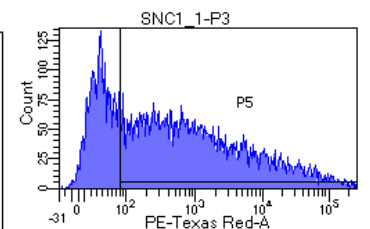

Tube: SNC1\_1

| Population | #Events | %Parent | %Total |
|------------|---------|---------|--------|
| All Events | 22,633  | ####    | 100.0  |
| P1         | 12,267  | 54.2    | 54.2   |
| P2         | 10,818  | 88.2    | 47.8   |
| P3         | 10,000  | 92.4    | 44.2   |
| P4         | 129     | 1.3     | 0.6    |
| P5         | 7,074   | 70.7    | 31.3   |
| P6         | 6,724   | 67.2    | 29.7   |
| P7         | 0       | 0.0     | 0.0    |

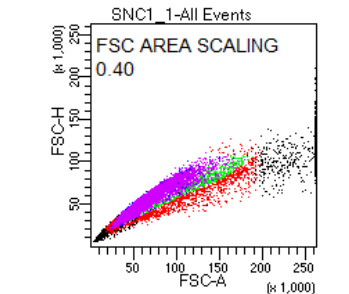

Tube: SNC1\_1

| Population | #Events | %Parent | %Total |
|------------|---------|---------|--------|
| All Events | 22,633  | ####    | 100.0  |
| P1         | 12,267  | 54.2    | 54.2   |
| P2         | 10,818  | 88.2    | 47.8   |
| P3         | 10,000  | 92.4    | 44.2   |
| P4         | 129     | 1.3     | 0.6    |
| P5         | 7,074   | 70.7    | 31.3   |
| P6         | 6,724   | 67.2    | 29.7   |
| P7         | 0       | 0.0     | 0.0    |

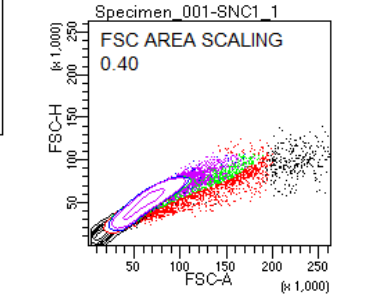

# Example N2A P2A sort (BE4max-P2A-GFP)

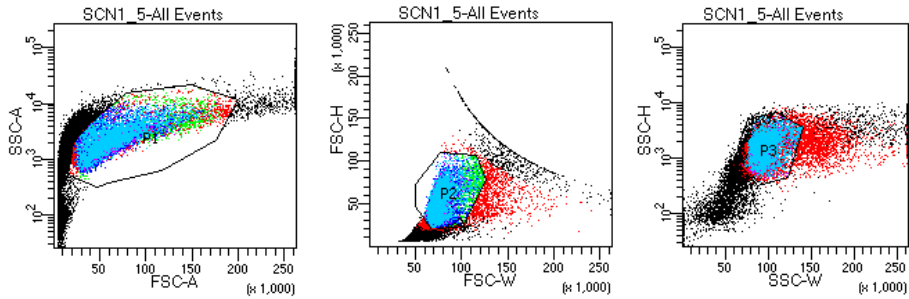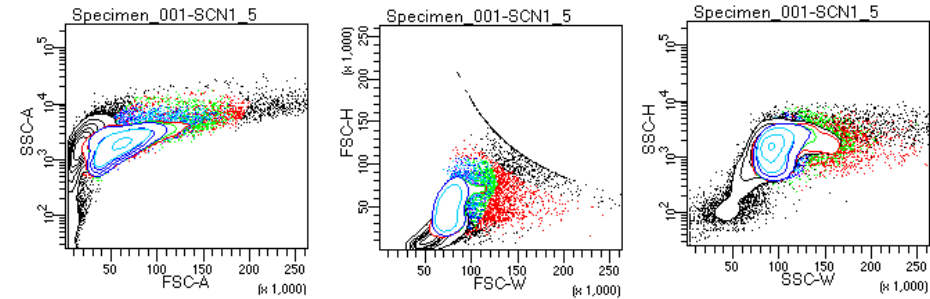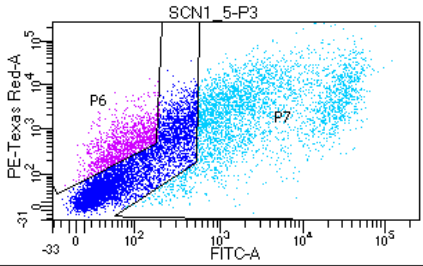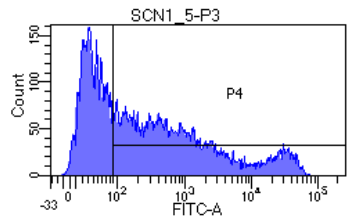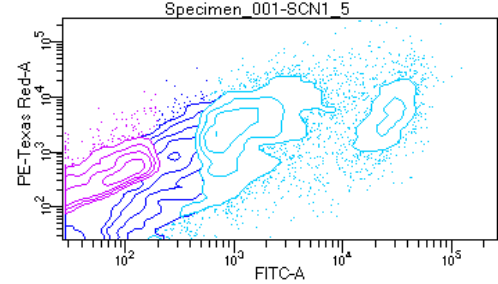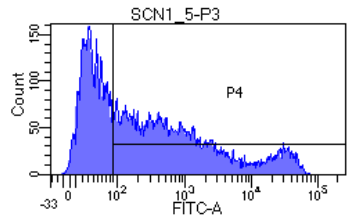

Experiment Name: 042418\_N2A  
 Specimen Name: Specimen\_001  
 Tube Name: SCN1\_5  
 Record Date: Apr 24, 2018 11:35:55 AM  
 SOP: LukeKoblan  
 GUID: c2e8ea6f-4747-49aa-a7f8-fa43...

| Population | #Events | %Parent | FITC-A Mean | FITC-A Median | PE-Te... Mean | PE-Te... Median |
|------------|---------|---------|-------------|---------------|---------------|-----------------|
| All Events | 23,250  | ####    | 1,863       | 61            | 1,998         | 102             |
| P1         | 12,300  | 52.9    | 3,024       | 190           | 3,074         | 368             |
| P2         | 10,825  | 88.0    | 3,024       | 173           | 3,072         | 361             |
| P3         | 10,000  | 92.4    | 2,981       | 159           | 2,976         | 338             |
| P4         | 6,078   | 60.8    | 4,883       | 605           | 4,815         | 1,231           |
| P5         | 6,972   | 69.7    | 4,249       | 421           | 4,255         | 914             |
| P6         | 1,314   | 13.1    | 80          | 71            | 731           | 471             |
| P7         | 3,422   | 34.2    | 8,495       | 2,004         | 7,730         | 2,982           |

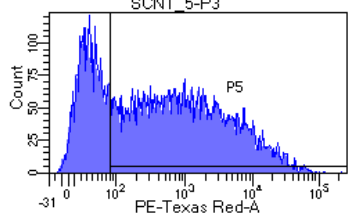

Specimen Name: Specimen\_001  
 Tube Name: SCN1\_5  
 Record Date: Apr 24, 2018 11:35:55 AM  
 SOP: LukeKoblan  
 GUID: c2e8ea6f-4747-49aa-a7f8-fa43...

| Population | #Events | %Parent | FITC-A Mean | FITC-A Median | PE-Te... Mean | PE-Te... Median |
|------------|---------|---------|-------------|---------------|---------------|-----------------|
| All Events | 23,250  | ####    | 1,863       | 61            | 1,998         | 102             |
| P1         | 12,300  | 52.9    | 3,024       | 190           | 3,074         | 368             |
| P2         | 10,825  | 88.0    | 3,024       | 173           | 3,072         | 361             |
| P3         | 10,000  | 92.4    | 2,981       | 159           | 2,976         | 338             |
| P4         | 6,078   | 60.8    | 4,883       | 605           | 4,815         | 1,231           |
| P5         | 6,972   | 69.7    | 4,249       | 421           | 4,255         | 914             |
| P6         | 1,314   | 13.1    | 80          | 71            | 731           | 471             |
| P7         | 3,422   | 34.2    | 8,495       | 2,004         | 7,730         | 2,982           |

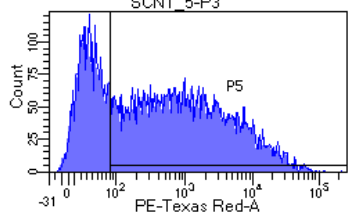

Tube: SCN1\_5

| Population | #Events | %Parent | %Total |
|------------|---------|---------|--------|
| All Events | 23,250  | ####    | 100.0  |
| P1         | 12,300  | 52.9    | 52.9   |
| P2         | 10,825  | 88.0    | 46.6   |
| P3         | 10,000  | 92.4    | 43.0   |
| P4         | 6,078   | 60.8    | 26.1   |
| P5         | 6,972   | 69.7    | 30.0   |
| P6         | 1,314   | 13.1    | 5.7    |
| P7         | 3,422   | 34.2    | 14.7   |

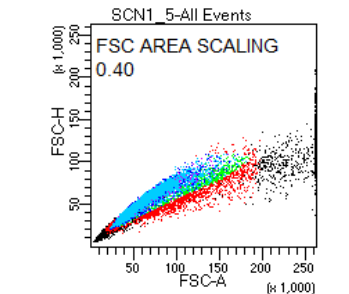

Tube: SCN1\_5

| Population | #Events | %Parent | %Total |
|------------|---------|---------|--------|
| All Events | 23,250  | ####    | 100.0  |
| P1         | 12,300  | 52.9    | 52.9   |
| P2         | 10,825  | 88.0    | 46.6   |
| P3         | 10,000  | 92.4    | 43.0   |
| P4         | 6,078   | 60.8    | 26.1   |
| P5         | 6,972   | 69.7    | 30.0   |
| P6         | 1,314   | 13.1    | 5.7    |
| P7         | 3,422   | 34.2    | 14.7   |

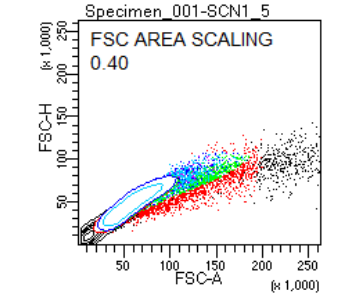



# Example N2A P2A sort (AncBE4max-P2A-GFP)

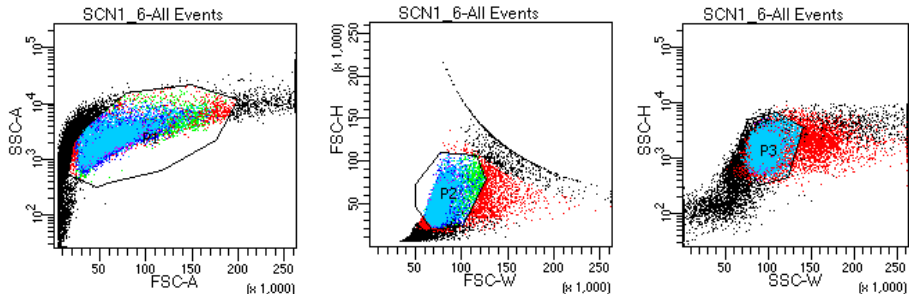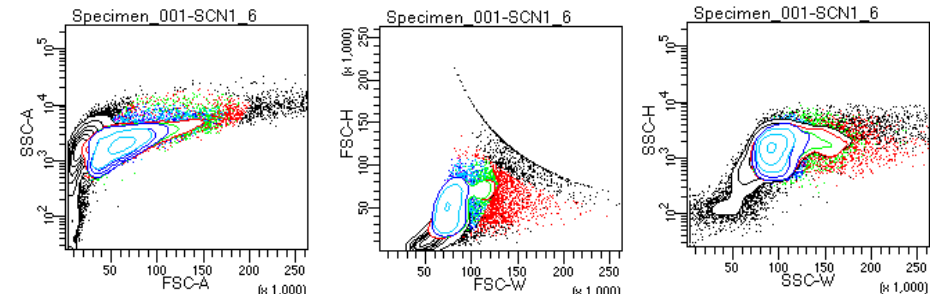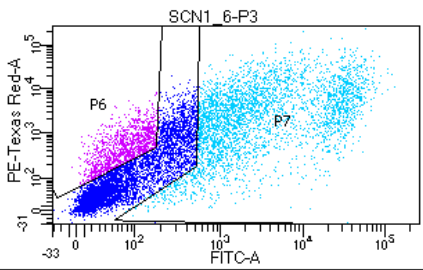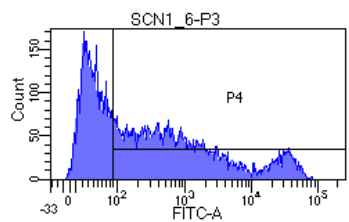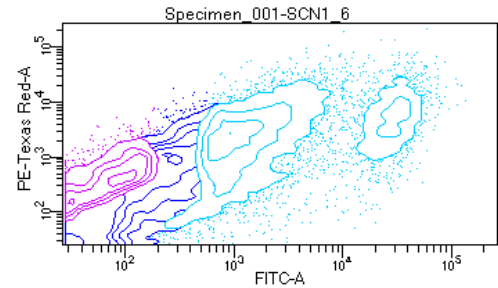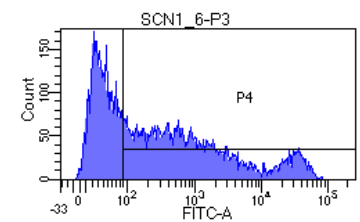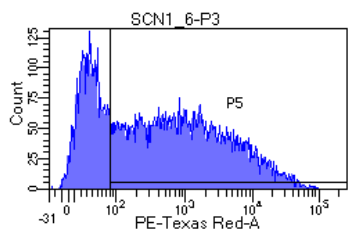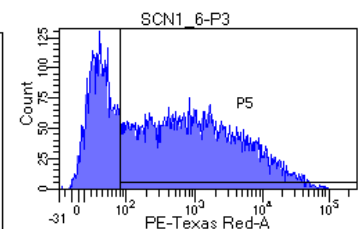

Experiment Name: 042418\_N2A  
 Specimen Name: Specimen\_001  
 Tube Name: SCN1\_6  
 Record Date: Apr 24, 2018 11:39:58 AM  
 SOP: LukeKoblan  
 GUID: 18a49be5-f22f-4cd1-9365-8e2b...

| Population | #Events | %Parent | FITC-A Mean | FITC-A Median | PE-Te... Mean | PE-Te... Median |
|------------|---------|---------|-------------|---------------|---------------|-----------------|
| All Events | 22,763  | ####    | 2,340       | 69            | 2,046         | 108             |
| P1         | 12,514  | 55.0    | 3,545       | 212           | 2,877         | 363             |
| P2         | 10,919  | 87.3    | 3,555       | 190           | 2,873         | 357             |
| P3         | 10,000  | 91.6    | 3,516       | 177           | 2,755         | 325             |
| P4         | 6,103   | 61.0    | 5,738       | 677           | 4,439         | 1,208           |
| P5         | 6,912   | 69.1    | 5,043       | 481           | 3,972         | 921             |
| P6         | 1,213   | 12.1    | 78          | 70            | 696           | 464             |
| P7         | 3,589   | 35.9    | 9,594       | 2,136         | 6,839         | 2,690           |

Specimen Name: Specimen\_001  
 Tube Name: SCN1\_6  
 Record Date: Apr 24, 2018 11:39:58 AM  
 SOP: LukeKoblan  
 GUID: 18a49be5-f22f-4cd1-9365-8e2b...

| Population | #Events | %Parent | FITC-A Mean | FITC-A Median | PE-Te... Mean | PE-Te... Median |
|------------|---------|---------|-------------|---------------|---------------|-----------------|
| All Events | 22,763  | ####    | 2,340       | 69            | 2,046         | 108             |
| P1         | 12,514  | 55.0    | 3,545       | 212           | 2,877         | 363             |
| P2         | 10,919  | 87.3    | 3,555       | 190           | 2,873         | 357             |
| P3         | 10,000  | 91.6    | 3,516       | 177           | 2,755         | 325             |
| P4         | 6,103   | 61.0    | 5,738       | 677           | 4,439         | 1,208           |
| P5         | 6,912   | 69.1    | 5,043       | 481           | 3,972         | 921             |
| P6         | 1,213   | 12.1    | 78          | 70            | 696           | 464             |
| P7         | 3,589   | 35.9    | 9,594       | 2,136         | 6,839         | 2,690           |

Tube: SCN1\_6

| Population | #Events | %Parent | %Total |
|------------|---------|---------|--------|
| All Events | 22,763  | ####    | 100.0  |
| P1         | 12,514  | 55.0    | 55.0   |
| P2         | 10,919  | 87.3    | 48.0   |
| P3         | 10,000  | 91.6    | 43.9   |
| P4         | 6,103   | 61.0    | 26.8   |
| P5         | 6,912   | 69.1    | 30.4   |
| P6         | 1,213   | 12.1    | 5.3    |
| P7         | 3,589   | 35.9    | 15.8   |

Tube: SCN1\_6

| Population | #Events | %Parent | %Total |
|------------|---------|---------|--------|
| All Events | 22,763  | ####    | 100.0  |
| P1         | 12,514  | 55.0    | 55.0   |
| P2         | 10,919  | 87.3    | 48.0   |
| P3         | 10,000  | 91.6    | 43.9   |
| P4         | 6,103   | 61.0    | 26.8   |
| P5         | 6,912   | 69.1    | 30.4   |
| P6         | 1,213   | 12.1    | 5.3    |
| P7         | 3,589   | 35.9    | 15.8   |

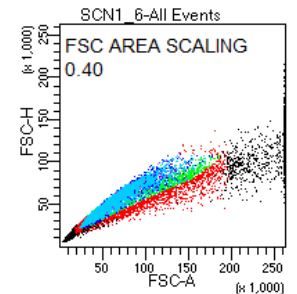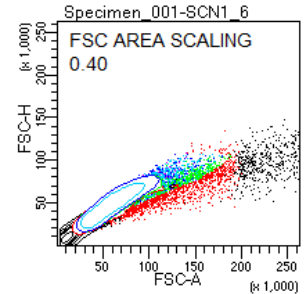

Figure 2 Flow Sorting  
CGD Type 1F Fibroblasts  
Controls

# Fibroblast negative control

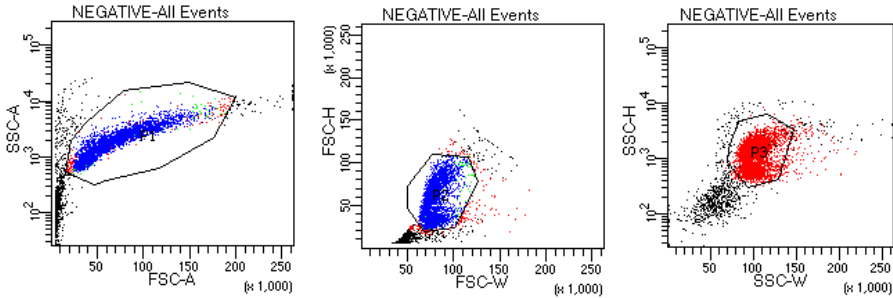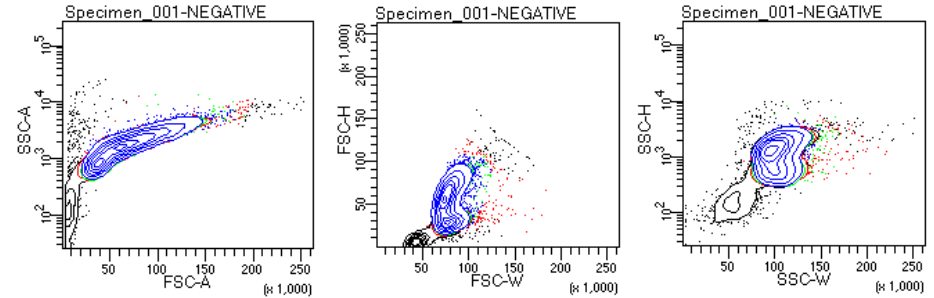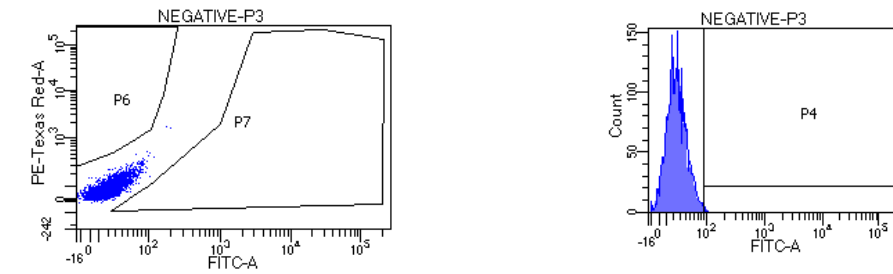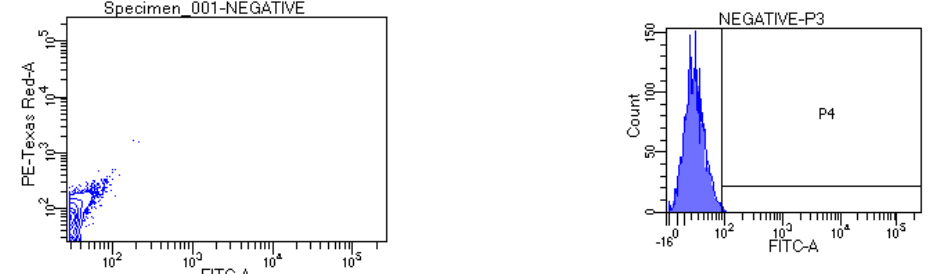

Experiment Name: 042418\_TYPE 1F  
 Specimen Name: Specimen\_001  
 Tube Name: NEGATIVE  
 Record Date: Apr 24, 2018 10:00:48 AM  
 SOP: LukeKoblan  
 GUID: 8efe2b16-449b-4d60-8c67-87c6...

| Population | #Events | %Parent | FITC-A Mean | FITC-A Median | PE-Te... Mean | PE-Te... Median |
|------------|---------|---------|-------------|---------------|---------------|-----------------|
| All Events | 3,997   | ####    | 21          | 17            | 89            | 62              |
| P1         | 3,142   | 78.6    | 23          | 19            | 90            | 73              |
| P2         | 2,964   | 94.3    | 22          | 19            | 89            | 73              |
| P3         | 2,863   | 96.6    | 22          | 19            | 88            | 73              |
| P4         | 12      | 0.4     | 108         | 92            | 571           | 387             |
| P5         | 2       | 0.1     | 182         | 182           | 1,664         | 1,664           |
| P6         | 0       | 0.0     | ####        | ####          | ####          | ####            |
| P7         | 0       | 0.0     | ####        | ####          | ####          | ####            |

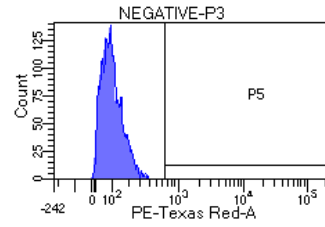

Experiment Name: 042418\_TYPE 1F  
 Specimen Name: Specimen\_001  
 Tube Name: NEGATIVE  
 Record Date: Apr 24, 2018 10:00:48 AM  
 SOP: LukeKoblan  
 GUID: 8efe2b16-449b-4d60-8c67-87c6...

| Population | #Events | %Parent | FITC-A Mean | FITC-A Median | PE-Te... Mean | PE-Te... Median |
|------------|---------|---------|-------------|---------------|---------------|-----------------|
| All Events | 3,997   | ####    | 21          | 17            | 89            | 62              |
| P1         | 3,142   | 78.6    | 23          | 19            | 90            | 73              |
| P2         | 2,964   | 94.3    | 22          | 19            | 89            | 73              |
| P3         | 2,863   | 96.6    | 22          | 19            | 88            | 73              |
| P4         | 12      | 0.4     | 108         | 92            | 571           | 387             |
| P5         | 2       | 0.1     | 182         | 182           | 1,664         | 1,664           |
| P6         | 0       | 0.0     | ####        | ####          | ####          | ####            |
| P7         | 0       | 0.0     | ####        | ####          | ####          | ####            |

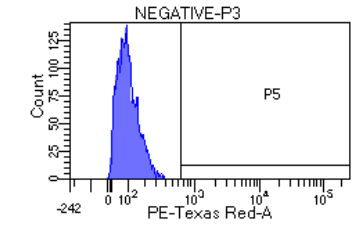

Tube: NEGATIVE

| Population | #Events | %Parent | %Total |
|------------|---------|---------|--------|
| All Events | 3,997   | ####    | 100.0  |
| P1         | 3,142   | 78.6    | 78.6   |
| P2         | 2,964   | 94.3    | 74.2   |
| P3         | 2,863   | 96.6    | 71.6   |
| P4         | 12      | 0.4     | 0.3    |
| P5         | 2       | 0.1     | 0.1    |
| P6         | 0       | 0.0     | 0.0    |
| P7         | 0       | 0.0     | 0.0    |

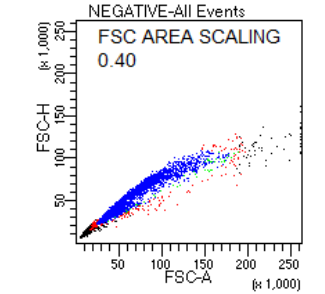

Tube: NEGATIVE

| Population | #Events | %Parent | %Total |
|------------|---------|---------|--------|
| All Events | 3,997   | ####    | 100.0  |
| P1         | 3,142   | 78.6    | 78.6   |
| P2         | 2,964   | 94.3    | 74.2   |
| P3         | 2,863   | 96.6    | 71.6   |
| P4         | 12      | 0.4     | 0.3    |
| P5         | 2       | 0.1     | 0.1    |
| P6         | 0       | 0.0     | 0.0    |
| P7         | 0       | 0.0     | 0.0    |

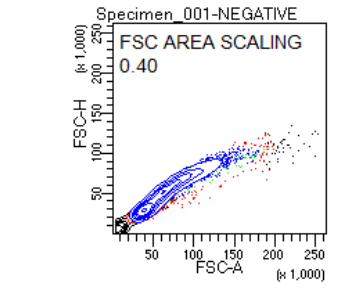

# Fibroblast GFP+ control

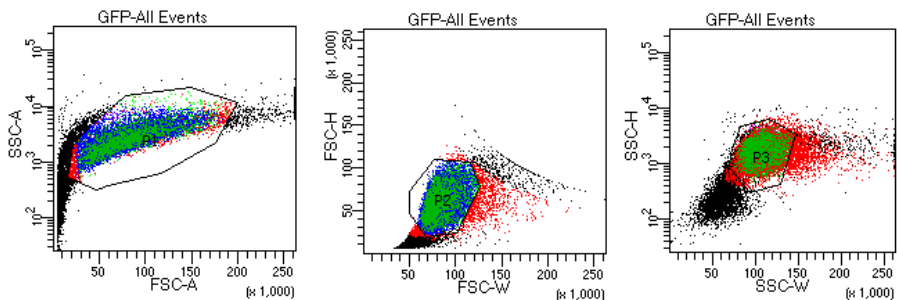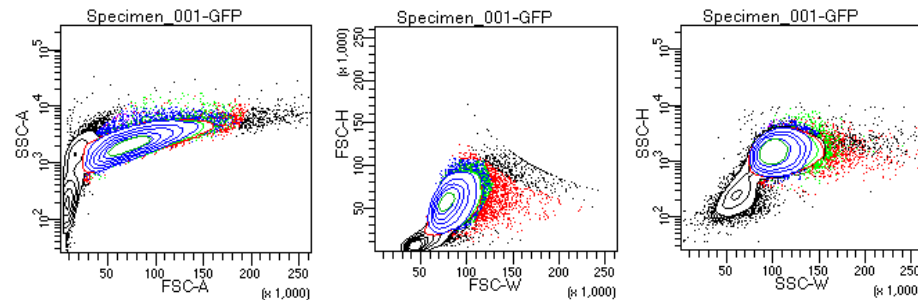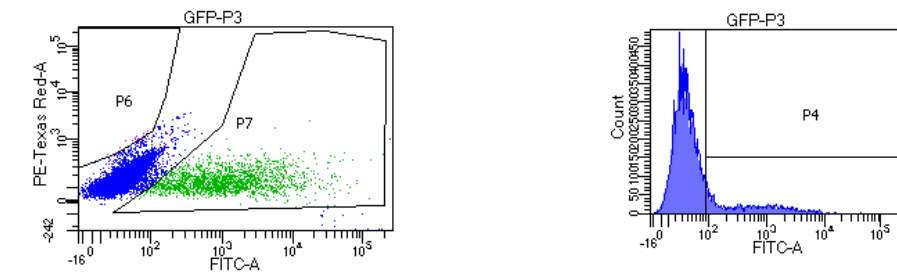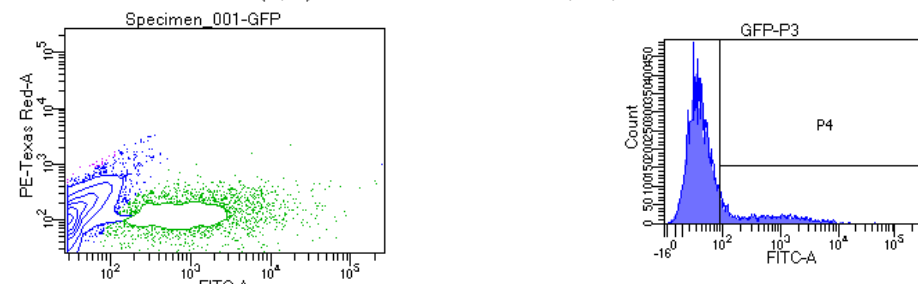

Experiment Name: 042418\_TYPE 1F  
 Specimen Name: Specimen\_001  
 Tube Name: GFP  
 Record Date: Apr 24, 2018 9:59:06 AM  
 SOP: LukeKoblan  
 GUID: b9c131f6-7da0-4598-801b-91c1...

| Population | #Events | %Parent | FITC-A Mean | FITC-A Median | PE-Te... Mean | PE-Te... Median |
|------------|---------|---------|-------------|---------------|---------------|-----------------|
| All Events | 20,047  | ####    | 556         | 31            | 183           | 128             |
| P1         | 14,261  | 71.1    | 714         | 38            | 199           | 148             |
| P2         | 12,932  | 90.7    | 679         | 37            | 190           | 144             |
| P3         | 12,235  | 94.6    | 673         | 36            | 182           | 140             |
| P4         | 2,618   | 21.4    | 3,028       | 596           | 245           | 158             |
| P5         | 182     | 1.5     | 1,624       | 126           | 1,170         | 994             |
| P6         | 21      | 0.2     | 65          | 66            | 1,099         | 1,036           |
| P7         | 2,063   | 16.9    | 3,162       | 934           | 160           | 134             |

Experiment Name: 042418\_TYPE 1F  
 Specimen Name: Specimen\_001  
 Tube Name: GFP  
 Record Date: Apr 24, 2018 9:59:06 AM  
 SOP: LukeKoblan  
 GUID: b9c131f6-7da0-4598-801b-91c1...

| Population | #Events | %Parent | FITC-A Mean | FITC-A Median | PE-Te... Mean | PE-Te... Median |
|------------|---------|---------|-------------|---------------|---------------|-----------------|
| All Events | 20,047  | ####    | 556         | 31            | 183           | 128             |
| P1         | 14,261  | 71.1    | 714         | 38            | 199           | 148             |
| P2         | 12,932  | 90.7    | 679         | 37            | 190           | 144             |
| P3         | 12,235  | 94.6    | 673         | 36            | 182           | 140             |
| P4         | 2,618   | 21.4    | 3,028       | 596           | 245           | 158             |
| P5         | 182     | 1.5     | 1,624       | 126           | 1,170         | 994             |
| P6         | 21      | 0.2     | 65          | 66            | 1,099         | 1,036           |
| P7         | 2,063   | 16.9    | 3,162       | 934           | 160           | 134             |

Tube: GFP

| Population | #Events | %Parent | %Total |
|------------|---------|---------|--------|
| All Events | 20,047  | ####    | 100.0  |
| P1         | 14,261  | 71.1    | 71.1   |
| P2         | 12,932  | 90.7    | 64.5   |
| P3         | 12,235  | 94.6    | 61.0   |
| P4         | 2,618   | 21.4    | 13.1   |
| P5         | 182     | 1.5     | 0.9    |
| P6         | 21      | 0.2     | 0.1    |
| P7         | 2,063   | 16.9    | 10.3   |

Tube: GFP

| Population | #Events | %Parent | %Total |
|------------|---------|---------|--------|
| All Events | 20,047  | ####    | 100.0  |
| P1         | 14,261  | 71.1    | 71.1   |
| P2         | 12,932  | 90.7    | 64.5   |
| P3         | 12,235  | 94.6    | 61.0   |
| P4         | 2,618   | 21.4    | 13.1   |
| P5         | 182     | 1.5     | 0.9    |
| P6         | 21      | 0.2     | 0.1    |
| P7         | 2,063   | 16.9    | 10.3   |

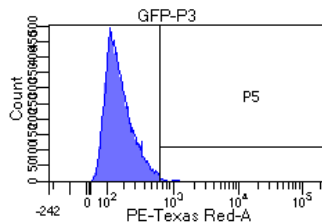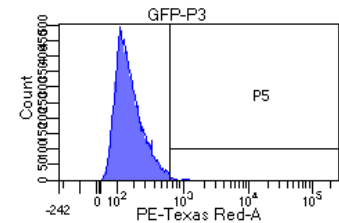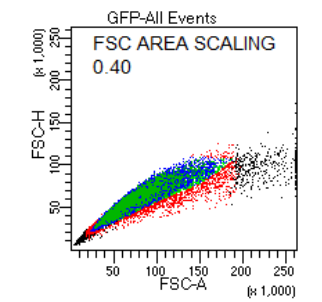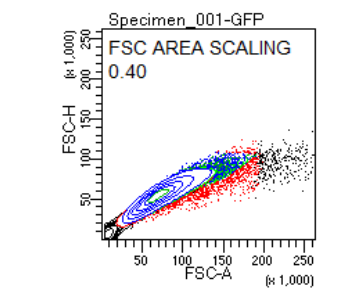

# Fibroblast mCherry+ control

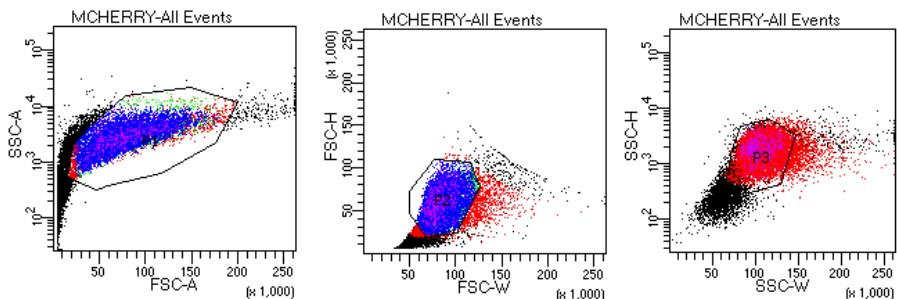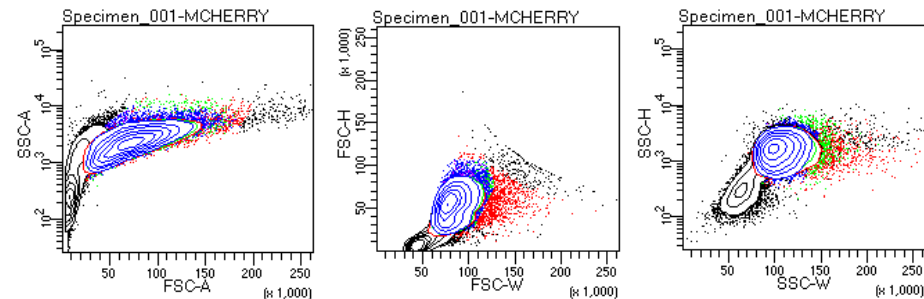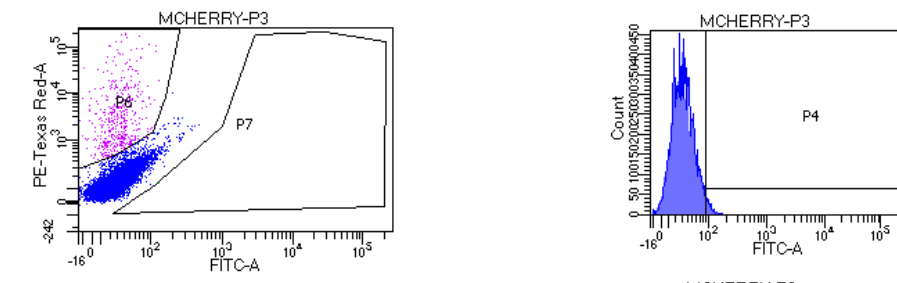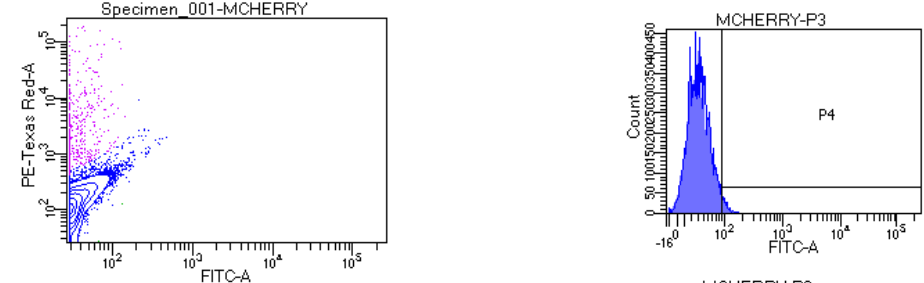

Experiment Name: 042418\_TYPE 1F  
 Specimen Name: Specimen\_001  
 Tube Name: MCHERRY  
 Record Date: Apr 24, 2018 10:02:37 AM  
 SOP: LukeKoblan  
 GUID: 2b248595-0441-4304-8bbe-972...

| Population | #Events | %Parent | FITC-A Mean | FITC-A Median | PE-Te... Mean | PE-Te... Median |
|------------|---------|---------|-------------|---------------|---------------|-----------------|
| All Events | 16,893  | ####    | 28          | 21            | 545           | 122             |
| P1         | 11,805  | 69.9    | 33          | 27            | 675           | 147             |
| P2         | 10,583  | 89.6    | 32          | 27            | 692           | 145             |
| P3         | 10,088  | 95.3    | 31          | 27            | 672           | 142             |
| P4         | 281     | 2.8     | 123         | 102           | 2,105         | 560             |
| P5         | 576     | 5.7     | 56          | 37            | 9,088         | 1,790           |
| P6         | 492     | 4.9     | 32          | 29            | 10,396        | 2,248           |
| P7         | 2       | 0.0     | 93          | 93            | 81            | 81              |

Experiment Name: 042418\_TYPE 1F  
 Specimen Name: Specimen\_001  
 Tube Name: MCHERRY  
 Record Date: Apr 24, 2018 10:02:37 AM  
 SOP: LukeKoblan  
 GUID: 2b248595-0441-4304-8bbe-972...

| Population | #Events | %Parent | FITC-A Mean | FITC-A Median | PE-Te... Mean | PE-Te... Median |
|------------|---------|---------|-------------|---------------|---------------|-----------------|
| All Events | 16,893  | ####    | 28          | 21            | 545           | 122             |
| P1         | 11,805  | 69.9    | 33          | 27            | 675           | 147             |
| P2         | 10,583  | 89.6    | 32          | 27            | 692           | 145             |
| P3         | 10,088  | 95.3    | 31          | 27            | 672           | 142             |
| P4         | 281     | 2.8     | 123         | 102           | 2,105         | 560             |
| P5         | 576     | 5.7     | 56          | 37            | 9,088         | 1,790           |
| P6         | 492     | 4.9     | 32          | 29            | 10,396        | 2,248           |
| P7         | 2       | 0.0     | 93          | 93            | 81            | 81              |

Tube: MCHERRY

| Population | #Events | %Parent | %Total |
|------------|---------|---------|--------|
| All Events | 16,893  | ####    | 100.0  |
| P1         | 11,805  | 69.9    | 69.9   |
| P2         | 10,583  | 89.6    | 62.6   |
| P3         | 10,088  | 95.3    | 59.7   |
| P4         | 281     | 2.8     | 1.7    |
| P5         | 576     | 5.7     | 3.4    |
| P6         | 492     | 4.9     | 2.9    |
| P7         | 2       | 0.0     | 0.0    |

Tube: MCHERRY

| Population | #Events | %Parent | %Total |
|------------|---------|---------|--------|
| All Events | 16,893  | ####    | 100.0  |
| P1         | 11,805  | 69.9    | 69.9   |
| P2         | 10,583  | 89.6    | 62.6   |
| P3         | 10,088  | 95.3    | 59.7   |
| P4         | 281     | 2.8     | 1.7    |
| P5         | 576     | 5.7     | 3.4    |
| P6         | 492     | 4.9     | 2.9    |
| P7         | 2       | 0.0     | 0.0    |

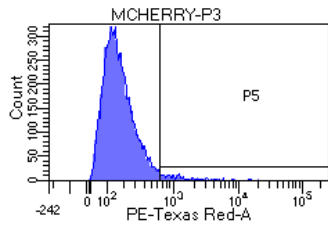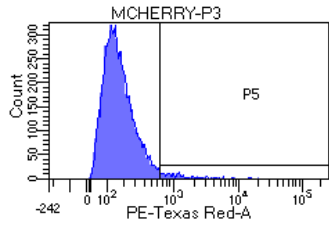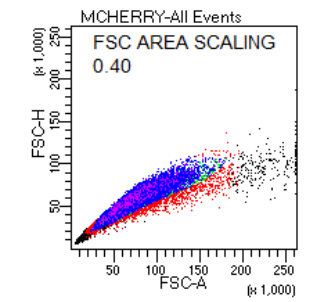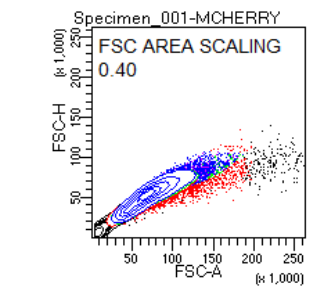

# Example Fibroblast In trans sort (BE4)

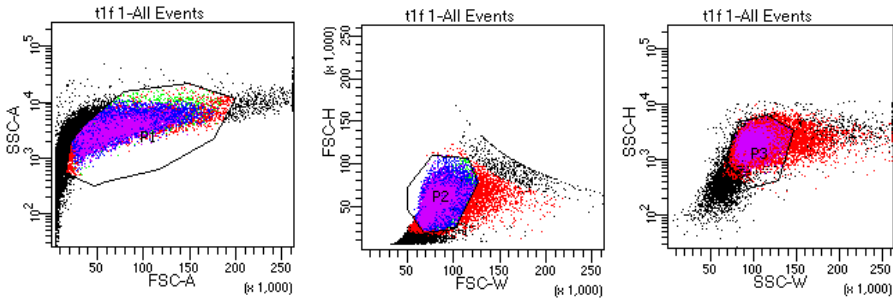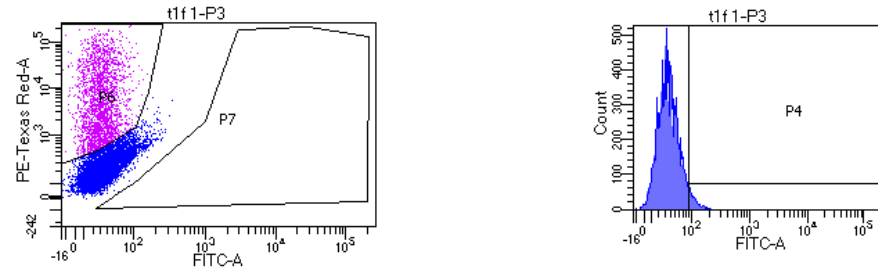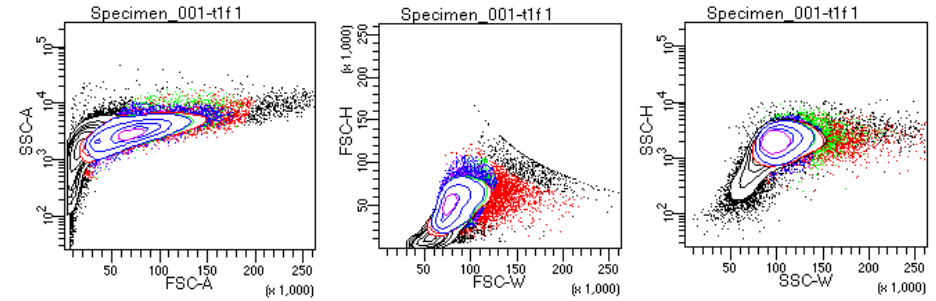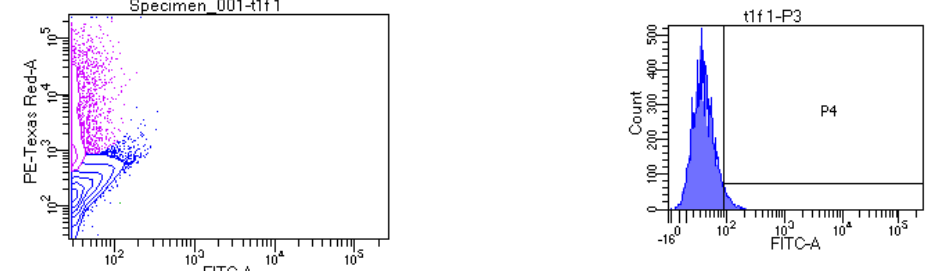

Experiment Name: 042418\_TYPE 1F  
 Specimen Name: Specimen\_001  
 Tube Name: t1f1  
 Record Date: Apr 24, 2018 10:14:38 AM  
 SOP: LukeKoblan  
 GUID: 1504f8a4-f3d2-4fa8-a681-c5da9...

| Population | #Events | %Parent | FITC-A Mean | FITC-A Median | PE-Te... Mean | PE-Te... Median |
|------------|---------|---------|-------------|---------------|---------------|-----------------|
| All Events | 25,986  | ####    | 33          | 23            | 2,349         | 225             |
| P1         | 13,263  | 51.0    | 40          | 31            | 3,967         | 288             |
| P2         | 10,832  | 81.7    | 38          | 31            | 4,232         | 290             |
| P3         | 10,254  | 94.7    | 36          | 31            | 4,264         | 279             |
| P4         | 481     | 4.7     | 118         | 105           | 3,937         | 661             |
| P5         | 2,573   | 25.1    | 42          | 31            | 16,263        | 3,245           |
| P6         | 2,335   | 22.8    | 30          | 27            | 16,460        | 4,094           |
| P7         | 1       | 0.0     | 107         | 107           | 114           | 114             |

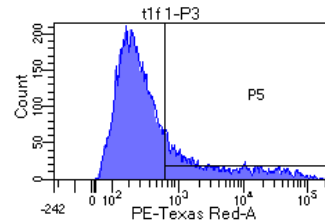

Experiment Name: 042418\_TYPE 1F  
 Specimen Name: Specimen\_001  
 Tube Name: t1f1  
 Record Date: Apr 24, 2018 10:14:38 AM  
 SOP: LukeKoblan  
 GUID: 1504f8a4-f3d2-4fa8-a681-c5da9...

| Population | #Events | %Parent | FITC-A Mean | FITC-A Median | PE-Te... Mean | PE-Te... Median |
|------------|---------|---------|-------------|---------------|---------------|-----------------|
| All Events | 25,986  | ####    | 33          | 23            | 2,349         | 225             |
| P1         | 13,263  | 51.0    | 40          | 31            | 3,967         | 288             |
| P2         | 10,832  | 81.7    | 38          | 31            | 4,232         | 290             |
| P3         | 10,254  | 94.7    | 36          | 31            | 4,264         | 279             |
| P4         | 481     | 4.7     | 118         | 105           | 3,937         | 661             |
| P5         | 2,573   | 25.1    | 42          | 31            | 16,263        | 3,245           |
| P6         | 2,335   | 22.8    | 30          | 27            | 16,460        | 4,094           |
| P7         | 1       | 0.0     | 107         | 107           | 114           | 114             |

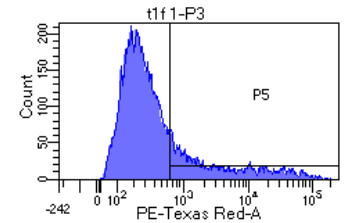

Tube: t1f1

| Population | #Events | %Parent | %Total |
|------------|---------|---------|--------|
| All Events | 25,986  | ####    | 100.0  |
| P1         | 13,263  | 51.0    | 51.0   |
| P2         | 10,832  | 81.7    | 41.7   |
| P3         | 10,254  | 94.7    | 39.5   |
| P4         | 481     | 4.7     | 1.9    |
| P5         | 2,573   | 25.1    | 9.9    |
| P6         | 2,335   | 22.8    | 9.0    |
| P7         | 1       | 0.0     | 0.0    |

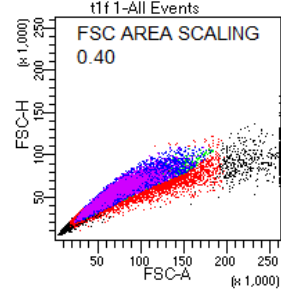

Tube: t1f1

| Population | #Events | %Parent | %Total |
|------------|---------|---------|--------|
| All Events | 25,986  | ####    | 100.0  |
| P1         | 13,263  | 51.0    | 51.0   |
| P2         | 10,832  | 81.7    | 41.7   |
| P3         | 10,254  | 94.7    | 39.5   |
| P4         | 481     | 4.7     | 1.9    |
| P5         | 2,573   | 25.1    | 9.9    |
| P6         | 2,335   | 22.8    | 9.0    |
| P7         | 1       | 0.0     | 0.0    |

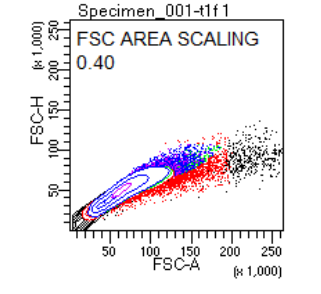

# Example Fibroblast P2A sort (BE4max-P2A-GFP)

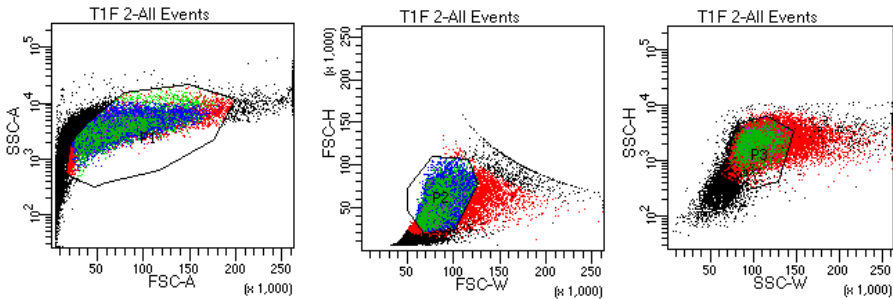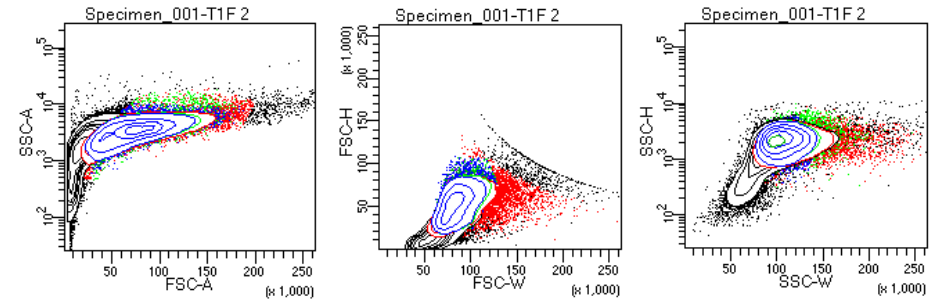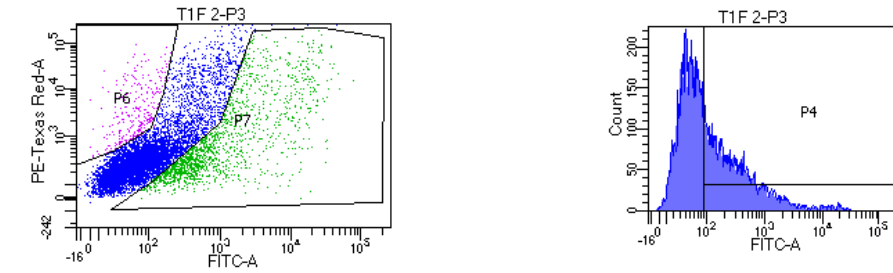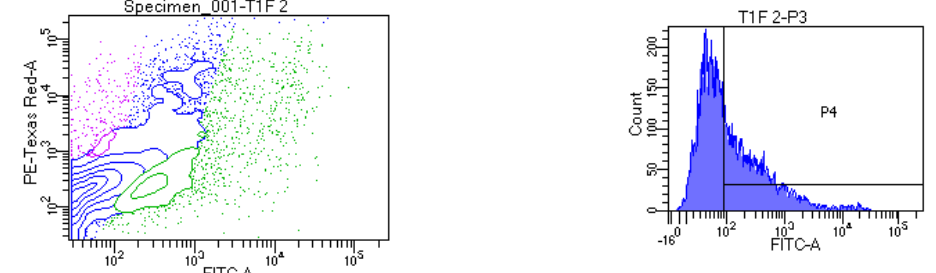

Experiment Name: 042418\_TYPE 1F  
 Specimen Name: Specimen\_001  
 Tube Name: T1F 2  
 Record Date: Apr 24, 2018 10:28:32 AM  
 SOP: LukeKoblan  
 GUID: a442668b-eb11-4746-8efa-94ef...

| Population | #Events | %Parent | FITC-A Mean | FITC-A Median | PE-Te... Mean | PE-Te... Median |
|------------|---------|---------|-------------|---------------|---------------|-----------------|
| All Events | 25,164  | ####    | 387         | 50            | 2,113         | 249             |
| P1         | 13,300  | 52.9    | 599         | 79            | 3,426         | 322             |
| P2         | 10,717  | 80.6    | 626         | 77            | 3,674         | 318             |
| P3         | 10,000  | 93.3    | 631         | 74            | 3,659         | 307             |
| P4         | 4,574   | 45.7    | 1,328       | 261           | 7,453         | 631             |
| P5         | 2,536   | 25.4    | 1,998       | 396           | 13,653        | 2,542           |
| P6         | 313     | 3.1     | 73          | 66            | 8,662         | 2,580           |
| P7         | 1,568   | 15.7    | 3,200       | 628           | 6,679         | 409             |

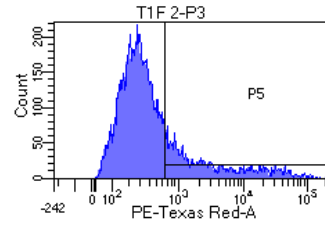

Experiment Name: 042418\_TYPE 1F  
 Specimen Name: Specimen\_001  
 Tube Name: T1F 2  
 Record Date: Apr 24, 2018 10:28:32 AM  
 SOP: LukeKoblan  
 GUID: a442668b-eb11-4746-8efa-94ef...

| Population | #Events | %Parent | FITC-A Mean | FITC-A Median | PE-Te... Mean | PE-Te... Median |
|------------|---------|---------|-------------|---------------|---------------|-----------------|
| All Events | 25,164  | ####    | 387         | 50            | 2,113         | 249             |
| P1         | 13,300  | 52.9    | 599         | 79            | 3,426         | 322             |
| P2         | 10,717  | 80.6    | 626         | 77            | 3,674         | 318             |
| P3         | 10,000  | 93.3    | 631         | 74            | 3,659         | 307             |
| P4         | 4,574   | 45.7    | 1,328       | 261           | 7,453         | 631             |
| P5         | 2,536   | 25.4    | 1,998       | 396           | 13,653        | 2,542           |
| P6         | 313     | 3.1     | 73          | 66            | 8,662         | 2,580           |
| P7         | 1,568   | 15.7    | 3,200       | 628           | 6,679         | 409             |

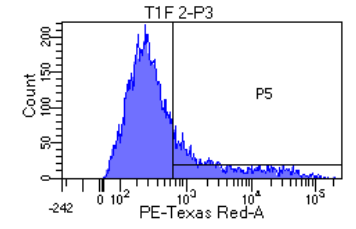

Tube: T1F 2

| Population | #Events | %Parent | %Total |
|------------|---------|---------|--------|
| All Events | 25,164  | ####    | 100.0  |
| P1         | 13,300  | 52.9    | 52.9   |
| P2         | 10,717  | 80.6    | 42.6   |
| P3         | 10,000  | 93.3    | 39.7   |
| P4         | 4,574   | 45.7    | 18.2   |
| P5         | 2,536   | 25.4    | 10.1   |
| P6         | 313     | 3.1     | 1.2    |
| P7         | 1,568   | 15.7    | 6.2    |

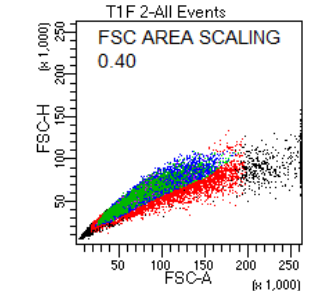

Tube: T1F 2

| Population | #Events | %Parent | %Total |
|------------|---------|---------|--------|
| All Events | 25,164  | ####    | 100.0  |
| P1         | 13,300  | 52.9    | 52.9   |
| P2         | 10,717  | 80.6    | 42.6   |
| P3         | 10,000  | 93.3    | 39.7   |
| P4         | 4,574   | 45.7    | 18.2   |
| P5         | 2,536   | 25.4    | 10.1   |
| P6         | 313     | 3.1     | 1.2    |
| P7         | 1,568   | 15.7    | 6.2    |

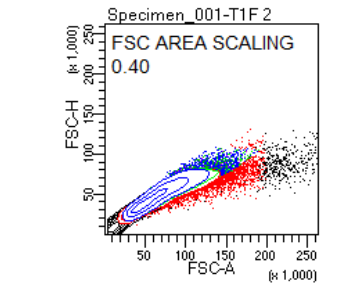



# Example Fibroblast P2A sort (AncBE4max-P2A-GFP)

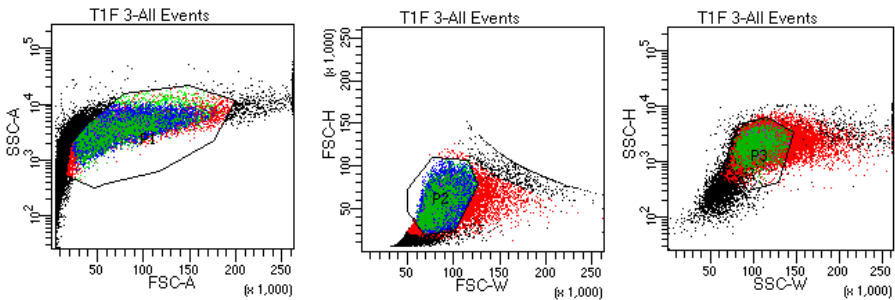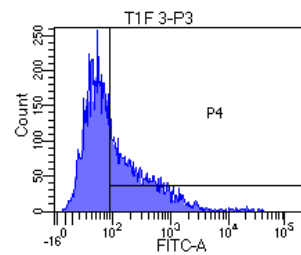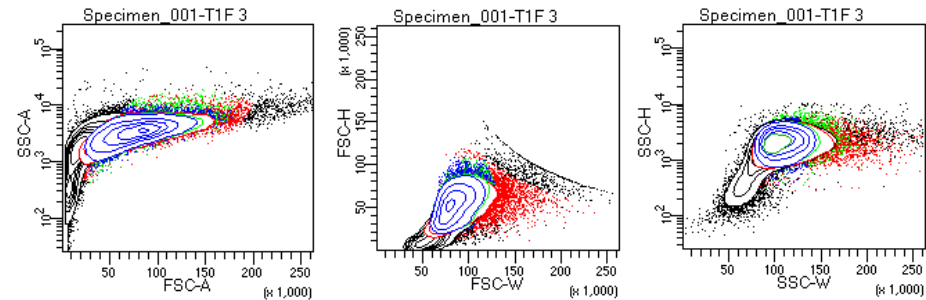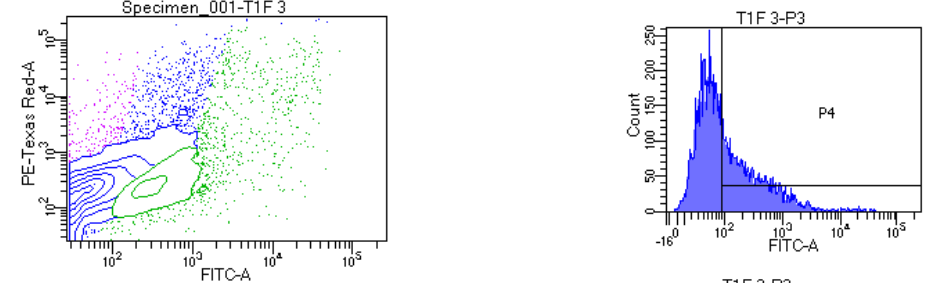

Experiment Name: 042418\_TYPE 1F  
 Specimen Name: Specimen\_001  
 Tube Name: T1F 3  
 Record Date: Apr 24, 2018 10:34:59 AM  
 SOP: LukeKoblan  
 GUID: 64ceca8f-c1d0-4b69-9cec-dd09...

| Population | #Events | %Parent | FITC-A Mean | FITC-A Median | PE-Te... Mean | PE-Te... Median |
|------------|---------|---------|-------------|---------------|---------------|-----------------|
| All Events | 23,227  | ####    | 400         | 49            | 1,650         | 229             |
| P1         | 13,269  | 57.1    | 588         | 73            | 2,420         | 278             |
| P2         | 10,754  | 81.0    | 607         | 72            | 2,519         | 277             |
| P3         | 10,000  | 93.0    | 613         | 69            | 2,478         | 269             |
| P4         | 4,349   | 43.5    | 1,355       | 256           | 5,280         | 488             |
| P5         | 1,958   | 19.6    | 2,398       | 451           | 11,637        | 2,112           |
| P6         | 215     | 2.2     | 70          | 64            | 6,328         | 2,442           |
| P7         | 1,820   | 18.2    | 2,761       | 545           | 5,453         | 330             |

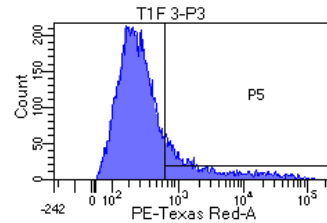

Experiment Name: 042418\_TYPE 1F  
 Specimen Name: Specimen\_001  
 Tube Name: T1F 3  
 Record Date: Apr 24, 2018 10:34:59 AM  
 SOP: LukeKoblan  
 GUID: 64ceca8f-c1d0-4b69-9cec-dd09...

| Population | #Events | %Parent | FITC-A Mean | FITC-A Median | PE-Te... Mean | PE-Te... Median |
|------------|---------|---------|-------------|---------------|---------------|-----------------|
| All Events | 23,227  | ####    | 400         | 49            | 1,650         | 229             |
| P1         | 13,269  | 57.1    | 588         | 73            | 2,420         | 278             |
| P2         | 10,754  | 81.0    | 607         | 72            | 2,519         | 277             |
| P3         | 10,000  | 93.0    | 613         | 69            | 2,478         | 269             |
| P4         | 4,349   | 43.5    | 1,355       | 256           | 5,280         | 488             |
| P5         | 1,958   | 19.6    | 2,398       | 451           | 11,637        | 2,112           |
| P6         | 215     | 2.2     | 70          | 64            | 6,328         | 2,442           |
| P7         | 1,820   | 18.2    | 2,761       | 545           | 5,453         | 330             |

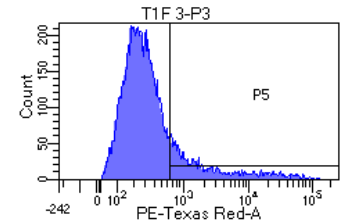

Tube: T1F 3

| Population | #Events | %Parent | %Total |
|------------|---------|---------|--------|
| All Events | 23,227  | ####    | 100.0  |
| P1         | 13,269  | 57.1    | 57.1   |
| P2         | 10,754  | 81.0    | 46.3   |
| P3         | 10,000  | 93.0    | 43.1   |
| P4         | 4,349   | 43.5    | 18.7   |
| P5         | 1,958   | 19.6    | 8.4    |
| P6         | 215     | 2.2     | 0.9    |
| P7         | 1,820   | 18.2    | 7.8    |

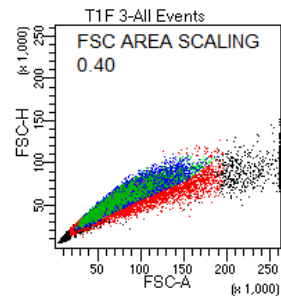

Tube: T1F 3

| Population | #Events | %Parent | %Total |
|------------|---------|---------|--------|
| All Events | 23,227  | ####    | 100.0  |
| P1         | 13,269  | 57.1    | 57.1   |
| P2         | 10,754  | 81.0    | 46.3   |
| P3         | 10,000  | 93.0    | 43.1   |
| P4         | 4,349   | 43.5    | 18.7   |
| P5         | 1,958   | 19.6    | 8.4    |
| P6         | 215     | 2.2     | 0.9    |
| P7         | 1,820   | 18.2    | 7.8    |

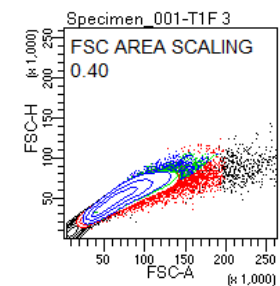

Supplement: NIHMS969743-supplement-2.pdf [file NIHMS969743-supplement-2.pdf]
