# Supplementary material
Source: PubMed Central journal article supplement (PMC6126947)
Supplement: NIHMS969743-supplement-1.pdf [file NIHMS969743-supplement-1.pdf]

## **Cytidine and adenine base editors with improved editing efficiencies in mammalian cells**

Luke W. Koblan, Jordan L. Doman, Christopher Wilson, Jonathan M. Levy, Tristan Tay, Greg A. Newby, Juan Pablo Maiani, Aditya Raguram, David R. Liu

### **SUPPLEMENTARY INFORMATION**

Supplementary Figure 1. Cytidine and adenine base editing schematic and disease associated SNPs.

Supplementary Figure 2. Unpaired two-sided t-test p-values and t-values for NLS and codon optimizations.

Supplementary Figure 3. C•G-to-T•A base editing outcomes for BE4 variants with chimeric codon usages.

Supplementary Figure 4. Multiple sequence alignment of rat APOBEC1 and reconstructed ancestral cytidine deaminases.

Supplementary Figure 5. Unpaired two-sided t-test p-values and t-values for BE4, BE4max, and AncBE4max editing at three genomic loci.

Supplementary Figure 6. Indel frequencies for BE4, BE4max, and AncBE4 at three genomic loci.

Supplementary Figure 7. Base editing purity for cytidine and adenine base editors.

Supplementary Figure 8. Base editing windows for cytidine and adenine base editors remain unchanged after optimization.

Supplementary Figure 9. Improved mRNA levels, protein levels, and base editing from BE4max and AncBE4max compared with BE4.

Supplementary Figure 10. Optimization of the ABE7.10 A•T-to-G•C base editor by improving nuclear localization and improving codon usage.

Supplementary Figure 11. Unpaired two-sided t-test p-values and t-values for editing by ABE7.10 and ABEmax.

Supplementary Figure 12. Indel frequencies for ABE7.10 versus ABEmax at three genomic loci.

Supplementary Figure 13. Improved mRNA and protein levels for ABEmax ABE7.10.

Supplementary Figure 14. Nucleofection and transfection efficiencies in type 1f fibroblasts, N2a cells, and HEK293T cells for disease-associated targets.

Supplementary Figure 15. C•G-to-T•A base editing of the 3' splice acceptor of *SCN9a* intron 6 in sorted N2a cells.

Supplementary Figure 16. Original western blots for BE4, BE4max, AncBE4max, ABE7.10, and ABEmax.

Supplementary Figure 17. 468-taxa unrooted phylogeny of APOBEC homologs.

Supplementary Note 1. ClinVar database analysis script.

Supplementary Sequences 1. APOBEC homologs.

Supplementary Sequences 2. Amino acid sequences of BE4, rAPOBEC, ancestral APOBECs, ABE7.10, and P2A–GFP.

Supplementary Sequences 3. Codon-optimized nucleotide sequences of BE4, rAPOBEC, ancestral APOBECs, ABE7.10, and P2A–GFP.

Supplementary Sequences 4. Target protospacer sequences analyzed in this study.

Supplementary Sequences 5. Primers used in this study.

Supplementary File 1. MAFFT alignment APOBEC homologs in FASTA format.

Supplementary File 2. Flow cytometry gating examples for all cell types used.

Supplementary File 3. APOBEC tree in Newick format.

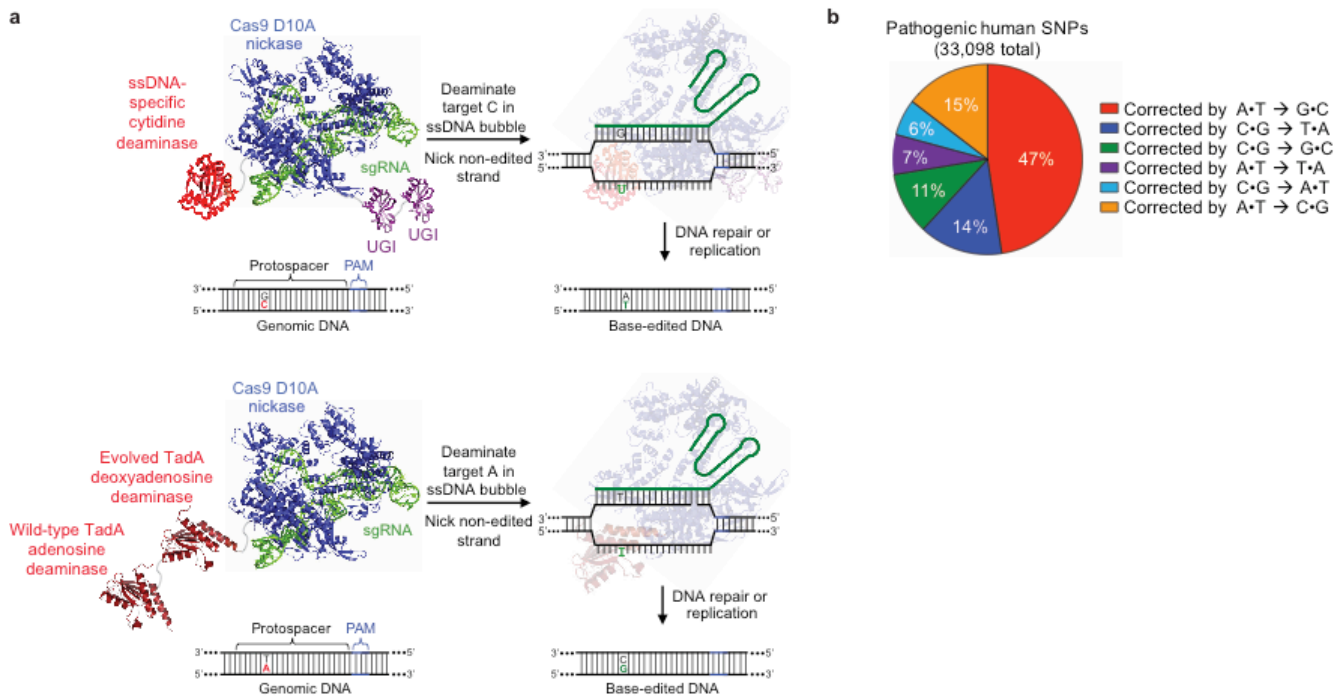

## Supplementary Figure 1

### Cytidine and adenine base editing schematic and disease associated SNPs

(a), BE4 (top) and ABE (bottom) induce the deamination of target C or target A nucleotides, and nick the non-edited strand to direct DNA repair processes to replace that strand using the deaminated C (uracil, U) or the deaminated A (inosine, I) as a template. The result is BE4-mediated conversion of a target C•G base pair to a T•A base pair, and ABE-mediated conversion of a target A•T base pair to a G•C base pair. (b) Base pair changes required to correct pathogenic SNPs in the ClinVar database. The red wedge (47%) require conversion of the type mediated by ABE, while the dark blue wedge (14%) require conversion of the type mediated by BE4.

**a**

BE4 (IDT codons): SV40 vs. bis-bpNLS

| Site           | p-value | t value | Significance |
|----------------|---------|---------|--------------|
| HEK2 C4        | 0.0112  | 4.454   | *            |
| HEK2 C6        | 0.0072  | 5.053   | **           |
| HEK3 C4        | 0.2838  | 1.237   | p>0.05       |
| HEK3 C5        | 0.3363  | 1.092   | p>0.05       |
| HEK4 C5        | 0.0620  | 2.570   | p>0.05       |
| <i>RNF2</i> C6 | 0.0217  | 3.655   | *            |
| <i>EMX1</i> C5 | 0.042   | 2.948   | *            |
| <i>EMX1</i> C6 | 0.0428  | 2.929   | *            |

**b**

bis-bpNLS: IDT codons vs. GenScript codons

| Site           | p-value | t value | Significance |
|----------------|---------|---------|--------------|
| HEK2 C4        | 0.0119  | 4.376   | *            |
| HEK2 C6        | 0.0107  | 4.511   | **           |
| HEK3 C4        | 0.0194  | 3.782   | *            |
| HEK3 C5        | 0.0263  | 3.441   | *            |
| HEK4 C5        | 0.0176  | 3.896   | *            |
| <i>RNF2</i> C6 | 0.0161  | 4.004   | *            |
| <i>EMX1</i> C5 | 0.0057  | 5.398   | *            |
| <i>EMX1</i> C6 | 0.0048  | 5.656   | *            |

**Supplementary Figure 2****Unpaired two-sided t-test p-values and t-values for NLS and codon optimizations**

(a) Unpaired two-sided t-test p-values and t-values for previously reported BE4 (C-terminal SV40 NLS, IDT codons) compared to bis-bpNLS BE4 (IDT codons) at all Cs within the activity window across five endogenous genomic loci in HEK293T cells transfected with 750 ng of base editor plasmid and 250 ng of sgRNA plasmid. (b) Unpaired two-sided t-test p-values and t-values for BE4 bis-bpNLS using IDE codons compared to GenScript codons at all Cs within the activity window across five endogenous genomic loci in HEK293T cells transfected with 750 ng of base editor plasmid and 250 ng of sgRNA plasmid. \*p≤0.05; \*\*p≤0.01. Values are from n=3 biologically independent experiments (dots) 3 days after transfection.

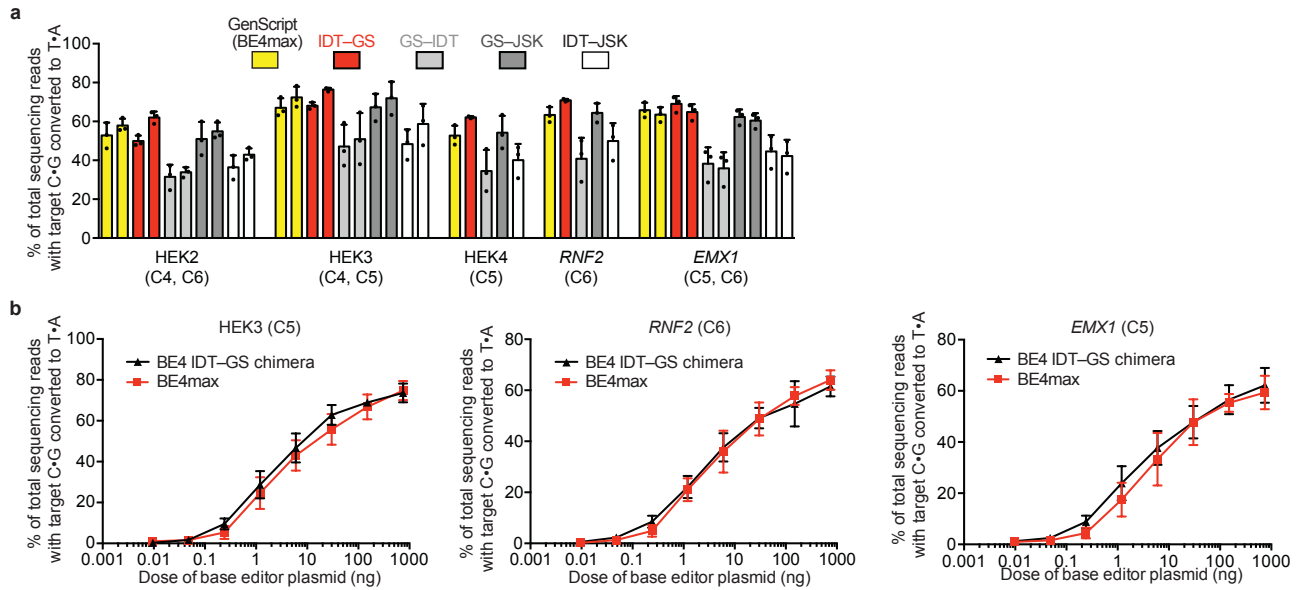

### Supplementary Figure 3

#### C•G-to-T•A base editing outcomes for BE4 variants

(a) C•G-to-T•A base editing efficiency of bis-bpNLS BE4 variants using full-length GenScript codon optimization (BE4max) compared to chimeric constructs in which the APOBEC1 and Cas9 nickase components are constructed with different codon usages in HEK293T cells. Chimeras include (APOBEC1–Cas9 nickase): GenScript–IDT, GenScript–Jin Soo Kim, IDT–Jin Soo Kim (Kim, S., Bae, T., Hwang, J. & Kim, J.S. *Genome biology* **18**, 218 (2017)). (b) Comparison of BE4max and bis-bpNLS BE4 with chimeric IDT–GenScript codon usage at three endogenous genomic loci in HEK293T cells across eight different plasmid doses. Values represent the mean and standard deviation of n=3 biologically independent experiments (dots) 3 days after transfection.

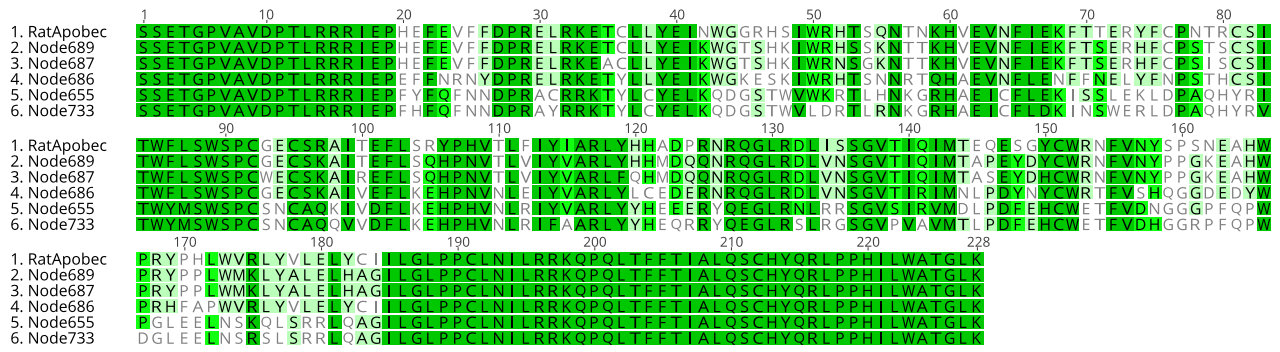

### Supplementary Figure 4

#### Multiple sequence alignment of rat APOBEC1 and reconstructed ancestral cytidine deaminases.

Residues are colored based on the degree of conservation.

| <b>a</b> HEK3 (C5), BE4 vs. BE4max |           |         |         | <b>b</b> HEK3 (C5), BE4 vs. AncBE4max |         |           |          | <b>c</b> HEK3 (C5), BE4max vs. AncBE4max |              |         |           |         |         |              |
|------------------------------------|-----------|---------|---------|---------------------------------------|---------|-----------|----------|------------------------------------------|--------------|---------|-----------|---------|---------|--------------|
| Plasmid                            | dose (ng) | p-value | t value | Significance                          | Plasmid | dose (ng) | p-value  | t value                                  | Significance | Plasmid | dose (ng) | p-value | t value | Significance |
|                                    | 750       | 0.008   | 4.908   | **                                    |         | 750       | 0.0013   | 7.990                                    | **           |         | 750       | 0.0274  | 3.396   | *            |
|                                    | 150       | 0.0531  | 2.718   | p>0.05                                |         | 150       | 0.0125   | 4.316                                    | *            |         | 150       | 0.0387  | 3.031   | *            |
|                                    | 30        | 0.0097  | 4.643   | **                                    |         | 30        | 0.001    | 8.704                                    | ***          |         | 30        | 0.0194  | 3.779   | *            |
|                                    | 6         | 0.0013  | 7.975   | **                                    |         | 6         | < 0.0001 | 18.20                                    | ****         |         | 6         | 0.0268  | 3.421   | *            |
|                                    | 1.2       | 0.0081  | 4.892   | **                                    |         | 1.2       | 0.0002   | 13.10                                    | ***          |         | 1.2       | 0.0446  | 2.888   | *            |
|                                    | 0.24      | 0.0849  | 2.279   | p>0.05                                |         | 0.24      | 0.0019   | 7.263                                    | **           |         | 0.24      | 0.0161  | 3.999   | *            |
|                                    | 0.048     | 0.1434  | 1.817   | p>0.05                                |         | 0.048     | 0.0156   | 4.039                                    | *            |         | 0.048     | 0.0504  | 2.768   | p>0.05       |
|                                    | 0.0096    | 0.5981  | 0.5718  | p>0.05                                |         | 0.0096    | 0.2015   | 1.527                                    | p>0.05       |         | 0.0096    | 0.0454  | 2.872   | *            |
|                                    |           |         |         |                                       |         |           |          |                                          |              |         |           |         |         | Max > Anc    |
| <b>RNF2 (C6), BE4 vs. BE4max</b>   |           |         |         | <b>RNF2 (C6), BE4 vs. AncBE4max</b>   |         |           |          | <b>RNF2 (C6), BE4max vs AncBE4max</b>    |              |         |           |         |         |              |
| Plasmid                            | dose (ng) | p-value | t value | Significance                          | Plasmid | dose (ng) | p-value  | t value                                  | Significance | Plasmid | dose (ng) | p-value | t value | Significance |
|                                    | 750       | 0.0005  | 10.08   | ***                                   |         | 750       | 0.0187   | 3.826                                    | *            |         | 750       | 0.8193  | 0.244   | p>0.05       |
|                                    | 150       | 0.0126  | 4.301   | *                                     |         | 150       | 0.0173   | 3.916                                    | *            |         | 150       | 0.9993  | 0.001   | p>0.05       |
|                                    | 30        | 0.0029  | 6.467   | **                                    |         | 30        | 0.0012   | 8.277                                    | **           |         | 30        | 0.5972  | 0.573   | p>0.05       |
|                                    | 6         | 0.0031  | 6.380   | **                                    |         | 6         | 0.0005   | 10.340                                   | ***          |         | 6         | 0.5895  | 0.586   | p>0.05       |
|                                    | 1.2       | 0.002   | 7.186   | **                                    |         | 1.2       | 0.0019   | 7.315                                    | **           |         | 1.2       | 0.4079  | 0.924   | p>0.05       |
|                                    | 0.24      | 0.0283  | 3.360   | *                                     |         | 0.24      | 0.0039   | 5.995                                    | **           |         | 0.24      | 0.0777  | 2.359   | p>0.05       |
|                                    | 0.048     | 0.0277  | 3.382   | *                                     |         | 0.048     | 0.004    | 5.944                                    | **           |         | 0.048     | 0.0615  | 2.578   | p>0.05       |
|                                    | 0.0096    | 0.3329  | 1.100   | p>0.05                                |         | 0.0096    | 0.0115   | 4.421                                    | *            |         | 0.0096    | 0.015   | 4.084   | *            |
| <b>EMX1 (C5), BE4 vs. BE4max</b>   |           |         |         | <b>EMX1 (C5), BE4 vs. AncBE4max</b>   |         |           |          | <b>EMX1 (C5), BE4max vs AncBE4max</b>    |              |         |           |         |         |              |
| Plasmid                            | dose (ng) | p-value | t value | Significance                          | Plasmid | dose (ng) | p-value  | t value                                  | Significance | Plasmid | dose (ng) | p-value | t value | Significance |
|                                    | 750       | 0.0013  | 7.978   | **                                    |         | 750       | 0.0013   | 7.989                                    | **           |         | 750       | 0.0608  | 2.589   | p>0.05       |
|                                    | 150       | 0.0006  | 9.785   | ***                                   |         | 150       | 0.0006   | 9.980                                    | ***          |         | 150       | 0.0551  | 2.682   | p>0.05       |
|                                    | 30        | 0.0024  | 6.834   | **                                    |         | 30        | 0.0037   | 6.062                                    | **           |         | 30        | 0.7657  | 0.319   | p>0.05       |
|                                    | 6         | 0.004   | 5.967   | **                                    |         | 6         | 0.0007   | 9.521                                    | ***          |         | 6         | 0.4013  | 0.938   | p>0.05       |
|                                    | 1.2       | 0.0063  | 5.252   | **                                    |         | 1.2       | 0.0026   | 6.675                                    | **           |         | 1.2       | 0.1746  | 1.649   | p>0.05       |
|                                    | 0.24      | 0.0119  | 4.372   | *                                     |         | 0.24      | 0.0026   | 6.704                                    | **           |         | 0.24      | 0.0314  | 3.250   | *            |
|                                    | 0.048     | 0.0019  | 7.225   | **                                    |         | 0.048     | 0.0004   | 10.93                                    | ***          |         | 0.048     | 0.0033  | 6.287   | **           |
|                                    | 0.0096    | 0.1188  | 1.980   | p>0.05                                |         | 0.0096    | 0.0124   | 4.330                                    | *            |         | 0.0096    | 0.0216  | 3.657   | *            |

## Supplementary Figure 5

### Unpaired two-sided t-test p-values and t-values for BE4, BE4max, and AncBE4max editing at three genomic loci

(a) Unpaired two-sided t-test p-values and t-values for BE4 compared to BE4max at HEK3 (C5), *RNF2* (C6), and *EMX1* (C5) across eight different base editor plasmid doses in HEK293T cells. (b) Unpaired two-sided t-test p-values and t-values for BE4 compared to AncBE4max at HEK3 (C5), *RNF2* (C6), and *EMX1* (C5) across eight different base editor plasmid doses in HEK293T cells. (c) Unpaired two-sided t-test p-values and t-values for BE4max compared to AncBE4max at HEK3 (C5), *RNF2* (C6), and *EMX1* (C5) across eight different base editor plasmid doses in HEK293T cells. \*p≤0.05; \*\*p≤0.01; \*\*\*p≤0.001; \*\*\*\*p≤0.0001. Values are from n=3 biologically independent experiments (dots) 3 days after transfection.

| <b>a</b>  |           |          |       | <b>b</b>     |           |          |       | <b>c</b>        |           |          |       |
|-----------|-----------|----------|-------|--------------|-----------|----------|-------|-----------------|-----------|----------|-------|
| HEK3, BE4 |           |          |       | HEK3, BE4max |           |          |       | HEK3, AncBE4max |           |          |       |
| Plasmid   | dose (ng) | % Indels | Stdev | Plasmid      | dose (ng) | % Indels | Stdev | Plasmid         | dose (ng) | % Indels | Stdev |
|           | 750       | 3.25     | 0.51  |              | 750       | 2.50     | 0.65  |                 | 750       | 2.23     | 0.14  |
|           | 150       | 3.65     | 0.44  |              | 150       | 2.51     | 0.46  |                 | 150       | 2.85     | 0.24  |
|           | 30        | 3.54     | 0.50  |              | 30        | 2.53     | 0.30  |                 | 30        | 2.92     | 0.56  |
|           | 6         | 1.76     | 0.51  |              | 6         | 2.87     | 0.37  |                 | 6         | 3.73     | 0.60  |
|           | 1.2       | 1.13     | 0.09  |              | 1.2       | 2.57     | 0.40  |                 | 1.2       | 3.57     | 0.84  |
|           | 0.24      | 0.51     | 0.15  |              | 0.24      | 1.10     | 0.39  |                 | 0.24      | 2.55     | 0.28  |
|           | 0.048     | 0.28     | 0.23  |              | 0.048     | 0.45     | 0.22  |                 | 0.048     | 0.82     | 0.04  |
|           | 0.0096    | 0.47     | 0.48  |              | 0.0096    | 0.17     | 0.11  |                 | 0.0096    | 0.13     | 0.03  |
|           |           |          |       |              |           |          |       |                 |           |          |       |
| RNF2, BE4 |           |          |       | RNF2, BE4max |           |          |       | RNF2, AncBE4max |           |          |       |
| Plasmid   | dose (ng) | % Indels | Stdev | Plasmid      | dose (ng) | % Indels | Stdev | Plasmid         | dose (ng) | % Indels | Stdev |
|           | 750       | 0.03     | 0.01  |              | 750       | 0.03     | 0.01  |                 | 750       | 0.03     | 0.00  |
|           | 150       | 0.02     | 0.00  |              | 150       | 0.03     | 0.01  |                 | 150       | 0.05     | 0.01  |
|           | 30        | 0.03     | 0.01  |              | 30        | 0.03     | 0.01  |                 | 30        | 0.04     | 0.00  |
|           | 6         | 0.03     | 0.01  |              | 6         | 0.04     | 0.01  |                 | 6         | 0.03     | 0.01  |
|           | 1.2       | 0.02     | 0.01  |              | 1.2       | 0.03     | 0.01  |                 | 1.2       | 0.03     | 0.01  |
|           | 0.24      | 0.03     | 0.00  |              | 0.24      | 0.03     | 0.00  |                 | 0.24      | 0.03     | 0.00  |
|           | 0.048     | 0.02     | 0.01  |              | 0.048     | 0.02     | 0.00  |                 | 0.048     | 0.03     | 0.00  |
|           | 0.0096    | 0.02     | 0.00  |              | 0.0096    | 0.03     | 0.00  |                 | 0.0096    | 0.03     | 0.01  |
|           |           |          |       |              |           |          |       |                 |           |          |       |
| EMX1, BE4 |           |          |       | EMX1, BE4max |           |          |       | EMX1, AncBE4max |           |          |       |
| Plasmid   | dose (ng) | % Indels | Stdev | Plasmid      | dose (ng) | % Indels | Stdev | Plasmid         | dose (ng) | % Indels | Stdev |
|           | 750       | 0.10     | 0.02  |              | 750       | 0.11     | 0.01  |                 | 750       | 0.09     | 0.01  |
|           | 150       | 0.08     | 0.01  |              | 150       | 0.09     | 0.01  |                 | 150       | 0.10     | 0.02  |
|           | 30        | 0.09     | 0.02  |              | 30        | 0.09     | 0.02  |                 | 30        | 0.09     | 0.01  |
|           | 6         | 0.08     | 0.02  |              | 6         | 0.08     | 0.00  |                 | 6         | 0.09     | 0.00  |
|           | 1.2       | 0.08     | 0.02  |              | 1.2       | 0.09     | 0.01  |                 | 1.2       | 0.09     | 0.01  |
|           | 0.24      | 0.08     | 0.01  |              | 0.24      | 0.07     | 0.01  |                 | 0.24      | 0.09     | 0.03  |
|           | 0.048     | 0.08     | 0.00  |              | 0.048     | 0.09     | 0.01  |                 | 0.048     | 0.09     | 0.01  |
|           | 0.0096    | 0.07     | 0.02  |              | 0.0096    | 0.10     | 0.02  |                 | 0.0096    | 0.09     | 0.00  |

### Supplementary Figure 6

#### Indel frequencies for BE4, BE4max, and AncBE4 at three genomic loci

Indel frequencies are shown for BE4, BE4max, and AncBE4max at HEK3, *RNF2*, and *EMX1* sites across eight different plasmid doses in HEK293T cells. % Indel and Stdev values represent the mean and standard deviation of n=3 biologically independent experiments 3 days after transfection.



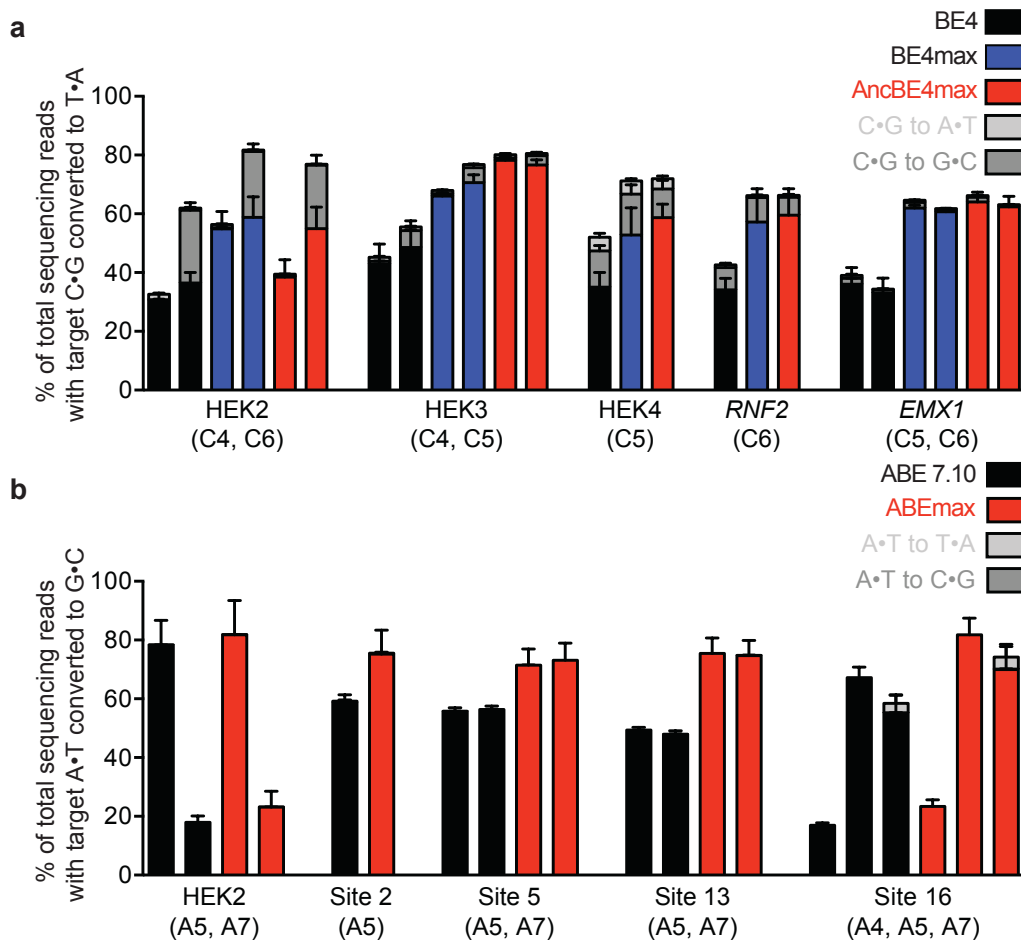

### Supplementary Figure 7

#### Base editing product purity for cytidine and adenine base editors

(a) Editing outcomes for BE4, BE4max, and AncBE4max at HEK2, HEK3, HEK4, *RNF2*, and *EMX1* sites. (b) Editing outcomes for ABE7.10 and ABEmax at HEK2, Site 2, Site 5, Site 13, and Site 16. Values represent the mean and standard deviation of n=3 biologically independent experiments 3 days after transfection.

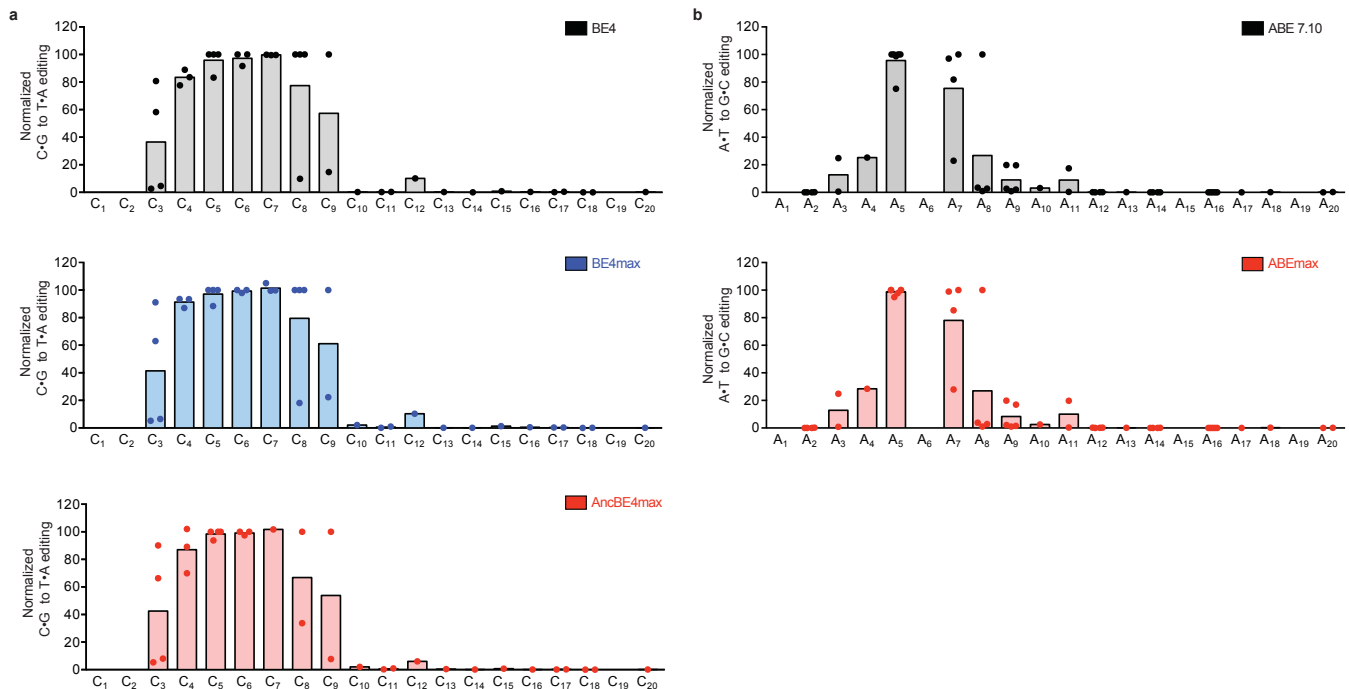

### Supplementary Figure 8

#### Base editing activity windows for cytidine and adenine base editors are unchanged after optimization

(a) Normalized C•G-to-T•A editing efficiency across the protospacer of HEK2, HEK3, HEK4, *RNF2*, *EMX1*, *MPDU1*, and *SCN9a* sites for BE4, BE4max, and AncBE4max. Protospacer bases are numbered such that the PAM is at positions 21-23. (b) Normalized A•T-to-G•C editing efficiency across the protospacer of HEK2, Site 2, Site 5, Site 13, Site 16, *HBG1*, and *HBG2* sites for ABE7.10 and ABEmax. Each point represents the average of n=3 biologically independent experiments for each position of each site sampled 3 days after transfection for each position at which a C or A was present in the editing window. No ABE loci tested in this study contained an A at protospacer position 6.

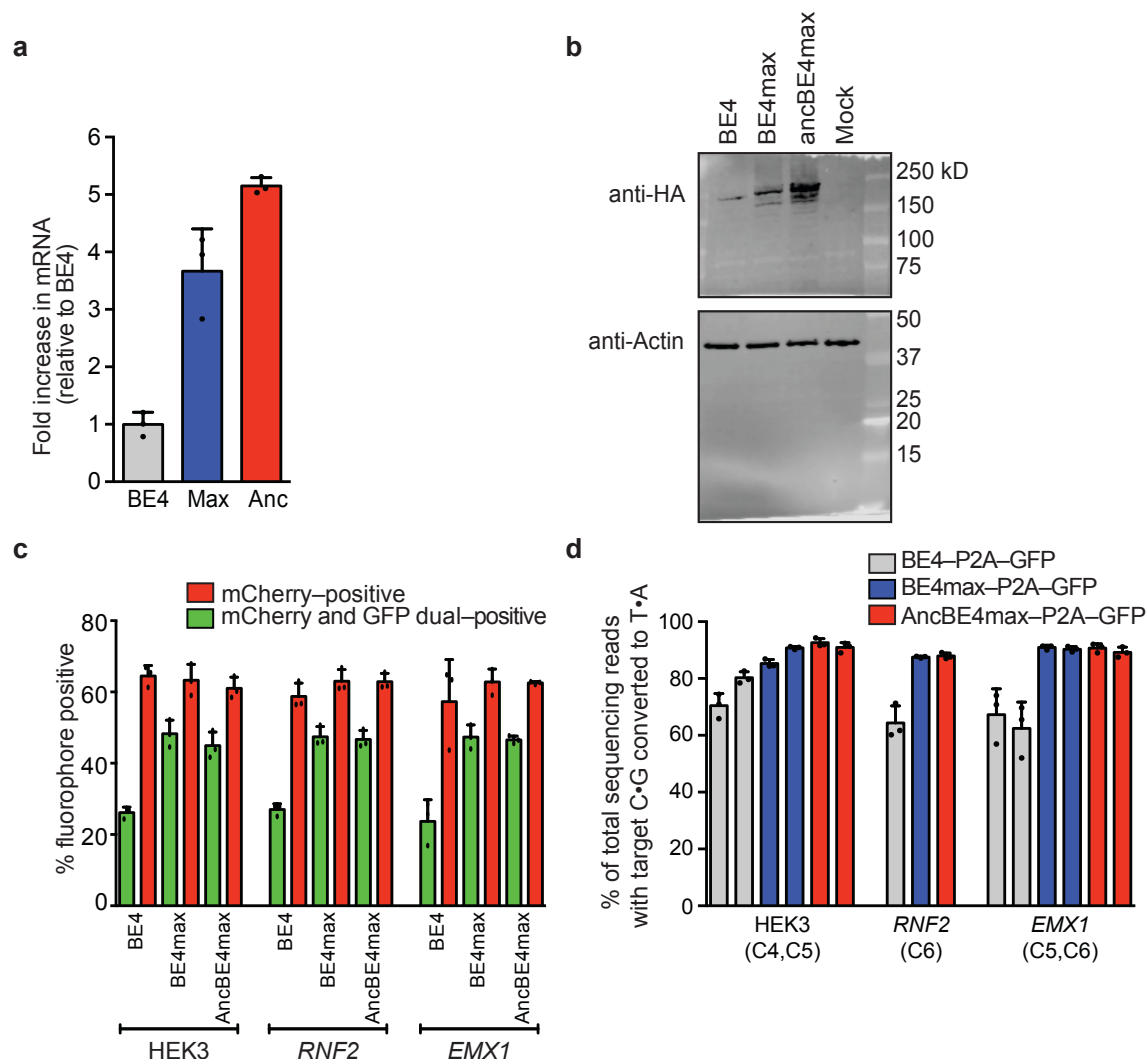

### Supplementary Figure 9

#### Improved mRNA levels, protein levels, and base editing from BE4max and AncBE4max compared with BE4

(a) BE4max and AncBE4max result in 3.7- and 5.2-fold higher mRNA levels, respectively, than BE4 in HEK293T cells 3 days after base editor and guide RNA plasmid transfection as determined by RT-qPCR. Base editor mRNA levels were normalized to  $\beta$ -actin levels by  $\Delta\Delta$ Ct. Normalized values were adjusted for transfection efficiency as determined by qPCR amplification of the bGH terminator sequence present on BE4 plasmids. (b) Western blot of C-terminal HA-tagged BE4, BE4max, and AncBE4max in HEK293T cells 3 days after plasmid transfection, visualizing with anti-HA (top) or anti-actin (bottom) antibodies. The mock sample is non-transfected cells. This blot was performed once. (c) BE4max-P2A-GFP and AncBE4max-P2A-GFP show higher GFP and mCherry double-positive cell populations compared to BE4-P2A-GFP for three genomic loci 3 days after transfection. (d) C•G-to-T•A base editing outcomes for GFP and mCherry dual-positive cells expressing BE4-P2A-GFP, BE4max-P2A-GFP, and AncBE4max-P2A-GFP at three genomic loci tested. Values and error bars in (a), (c), and (d) represent the mean and standard deviation of n=3 biologically independent experiments (dots) 3 days after transfection.

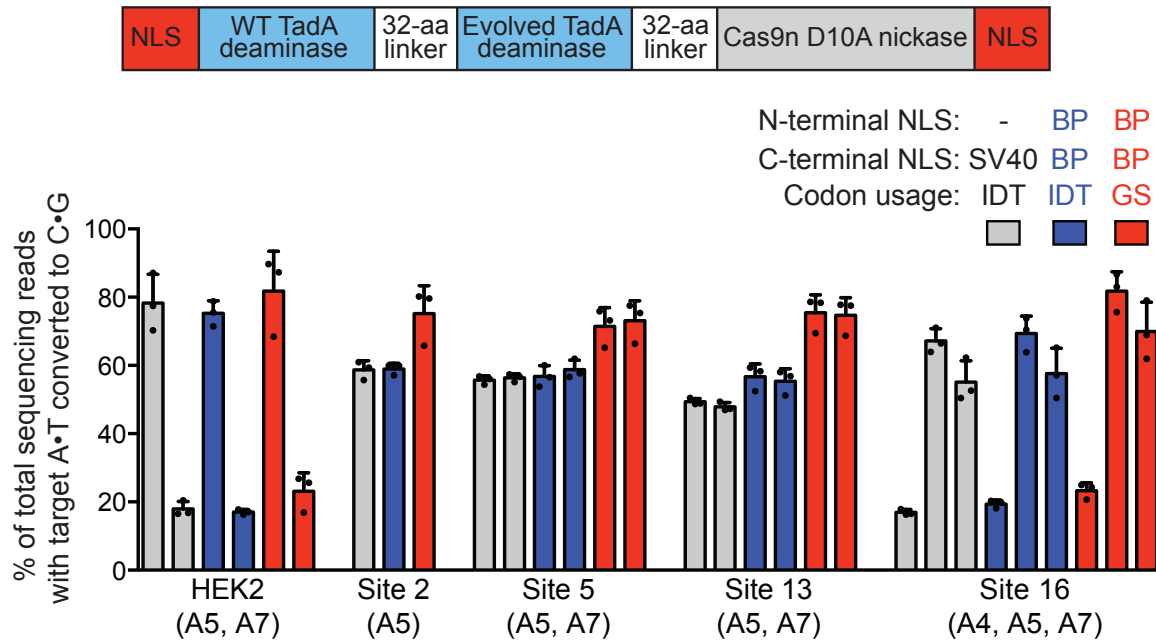

### Supplementary Figure 10

#### Optimization of the ABE7.10 A•T-to-G•C base editor by improving nuclear localization and improving codon usage

ABE architecture, effects of NLS configuration (SV40 versus bis-bpNLS), and effects of codon usage (IDT versus GenScript) on ABE base editing efficiency at five endogenous genomic loci in HEK293T cells. BP=bis-bpNLS; GS=GenScript codon usage. Values and error bars represent the mean and standard deviation of n=3 biologically independent experiments (dots) 3 days after transfection.

**a**

| ABE7.10 vs ABEmax |         |         |              |
|-------------------|---------|---------|--------------|
| Site              | p-value | t value | Significance |
| HEK2 A5           | 0.6933  | 0.4241  | p>0.05       |
| HEK2 A7           | 0.2012  | 1.528   | p>0.05       |
| Site 2 A5         | 0.0288  | 3.343   | *            |
| Site 5 A5         | 0.0089  | 4.768   | **           |
| Site 5 A7         | 0.0086  | 4.800   | **           |
| Site 13 A5        | 0.001   | 8.519   | ***          |
| Site 13 A7        | 0.001   | 8.694   | ***          |
| Site 16 A4        | 0.0105  | 4.539   | *            |
| Site 16 A5        | 0.0194  | 3.780   | *            |
| Site 16 A7        | 0.0723  | 2.425   | p>0.05       |

**b**

| Site 5 (A7), ABE7.10 vs. ABEmax |         |         |              |
|---------------------------------|---------|---------|--------------|
| Plasmid dose (ng)               | p-value | t value | Significance |
| 750                             | 0.0019  | 7.276   | **           |
| 150                             | 0.0002  | 13.80   | ***          |
| 30                              | <.0001  | 17.45   | ****         |
| 6                               | <.0001  | 17.74   | ****         |
| 1.2                             | 0.0005  | 10.59   | ***          |
| 0.24                            | 0.0577  | 2.638   | p>0.05       |
| 0.048                           | 0.1378  | 1.851   | p>0.05       |
| 0.0096                          | 0.093   | 2.196   | p>0.05       |

| Site 13 (A5), ABE7.10 vs. ABEmax |         |         |              |
|----------------------------------|---------|---------|--------------|
| Plasmid dose (ng)                | p-value | t value | Significance |
| 750                              | 0.0024  | 6.811   | **           |
| 150                              | 0.0003  | 11.62   | ***          |
| 30                               | 0.0001  | 14.28   | ***          |
| 6                                | <.0001  | 20.47   | ****         |
| 1.2                              | 0.0033  | 6.260   | **           |
| 0.24                             | 0.0623  | 2.566   | p>0.05       |
| 0.048                            | 0.2684  | 1.284   | p>0.05       |
| 0.0096                           | 0.8167  | 0.2474  | p>0.05       |

| Site 16 (A5), ABE7.10 vs ABEmax |         |         |              |
|---------------------------------|---------|---------|--------------|
| Plasmid dose (ng)               | p-value | t value | Significance |
| 750                             | 0.0077  | 4.958   | **           |
| 150                             | <.0001  | 18.92   | ****         |
| 30                              | <.0001  | 38.54   | ****         |
| 6                               | <.0001  | 21.96   | ****         |
| 1.2                             | 0.0008  | 9.274   | ***          |
| 0.24                            | 0.0289  | 3.339   | *            |
| 0.048                           | 0.1048  | 2.091   | p>0.05       |
| 0.0096                          | 0.3917  | 0.9593  | p>0.05       |

**Supplementary Figure 11****Unpaired two-sided t-test p-values and t-values for editing by ABE7.10 and ABEmax**

**(a)** Unpaired two-sided t-test p-values comparing ABE7.10 and ABEmax at five genomic loci tested with 750ng of ABE editor and 250ng gRNA in HEK293T cells. **(b)** Unpaired two-sided t-test p-values for ABE7.10 and ABEmax at Site 5 (A5), Site 13 (A5), and Site 16 (A5) across eight different plasmid doses in HEK293T cells. \*p≤0.05; \*\*p≤0.01; \*\*\*p≤0.001; \*\*\*\*p≤0.0001. Values are from n=3 biologically independent experiments (dots) 3 days after transfection.

| Site 5, ABE7.10   |         |       | Site 5, ABEmax    |         |       |
|-------------------|---------|-------|-------------------|---------|-------|
| Plasmid dose (ng) | Indel % | Stdev | Plasmid dose (ng) | Indel % | Stdev |
| 750               | 0.20    | 0.14  | 750               | 1.64    | 1.01  |
| 150               | 0.15    | 0.08  | 150               | 0.96    | 0.03  |
| 30                | 0.07    | 0.02  | 30                | 0.85    | 0.34  |
| 6                 | 0.05    | 0.01  | 6                 | 0.31    | 0.12  |
| 1.2               | 0.04    | 0.00  | 1.2               | 0.13    | 0.01  |
| 0.24              | 0.03    | 0.01  | 0.24              | 0.05    | 0.01  |
| 0.048             | 0.03    | 0.00  | 0.048             | 0.05    | 0.01  |
| 0.0096            | 0.03    | 0.01  | 0.0096            | 0.04    | 0.01  |

  

| Site 13, ABE7.10  |         |       | Site 13, ABEmax   |         |       |
|-------------------|---------|-------|-------------------|---------|-------|
| Plasmid dose (ng) | Indel % | Stdev | Plasmid dose (ng) | Indel % | Stdev |
| 750               | 0.25    | 0.15  | 750               | 1.52    | 0.65  |
| 150               | 0.15    | 0.07  | 150               | 0.73    | 0.13  |
| 30                | 0.10    | 0.03  | 30                | 0.55    | 0.23  |
| 6                 | 0.04    | 0.02  | 6                 | 0.28    | 0.11  |
| 1.2               | 0.02    | 0.00  | 1.2               | 0.12    | 0.03  |
| 0.24              | 0.02    | 0.00  | 0.24              | 0.05    | 0.03  |
| 0.048             | 0.02    | 0.01  | 0.048             | 0.02    | 0.01  |
| 0.0096            | 0.02    | 0.01  | 0.0096            | 0.02    | 0.01  |

  

| Site 16, ABE7.10  |         |       | Site 16, ABEmax   |         |       |
|-------------------|---------|-------|-------------------|---------|-------|
| Plasmid dose (ng) | Indel % | Stdev | Plasmid dose (ng) | Indel % | Stdev |
| 750               | 0.15    | 0.03  | 750               | 0.47    | 0.12  |
| 150               | 0.22    | 0.03  | 150               | 0.41    | 0.09  |
| 30                | 0.10    | 0.03  | 30                | 0.36    | 0.11  |
| 6                 | 0.06    | 0.01  | 6                 | 0.23    | 0.05  |
| 1.2               | 0.06    | 0.02  | 1.2               | 0.17    | 0.04  |
| 0.24              | 0.03    | 0.02  | 0.24              | 0.08    | 0.02  |
| 0.048             | 0.03    | 0.01  | 0.048             | 0.04    | 0.01  |
| 0.0096            | 0.04    | 0.01  | 0.0096            | 0.04    | 0.01  |

**Supplementary Figure 12**

**Indel frequencies for ABE7.10 versus ABEmax at three genomic loci**

Indel frequencies are shown for ABE7.10 and ABEmax at Site 5, Site 13, and Site 16 across eight different plasmid doses in HEK293T cells. % Indel and Stdev values represent the mean and standard deviation of n=3 biologically independent experiments 3 days after transfection.

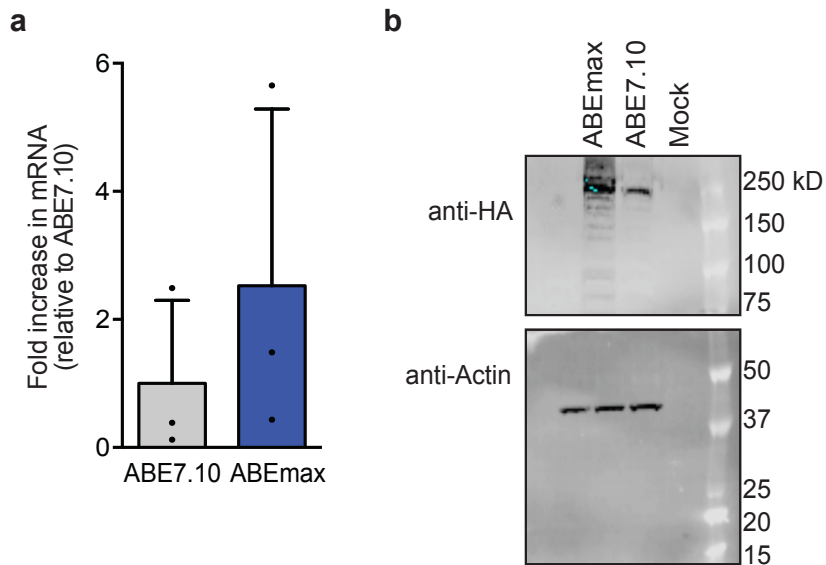

### Supplementary Figure 13

#### Improved mRNA and protein levels for ABEmax compared to ABE7.10

(a) ABEmax results in higher mRNA levels than ABE7.10 for all three replicates in HEK293T cells 3 days after base editor and sgRNA plasmid transfection as determined by RT-qPCR. mRNA and transfection levels were normalizations as described in Supplementary Fig. 9a. (b) Western blot of C-terminal HA-tagged ABE7.10 and ABEmax in HEK293T cells 3 days after plasmid transfection, visualizing with anti-HA (top) or anti-actin (bottom) antibodies. The mock sample is non-transfected cells. This blot was performed once. Values and error bars in (a) represent the mean and standard deviation of n=3 biologically independent experiments (dots) 3 days after transfection.

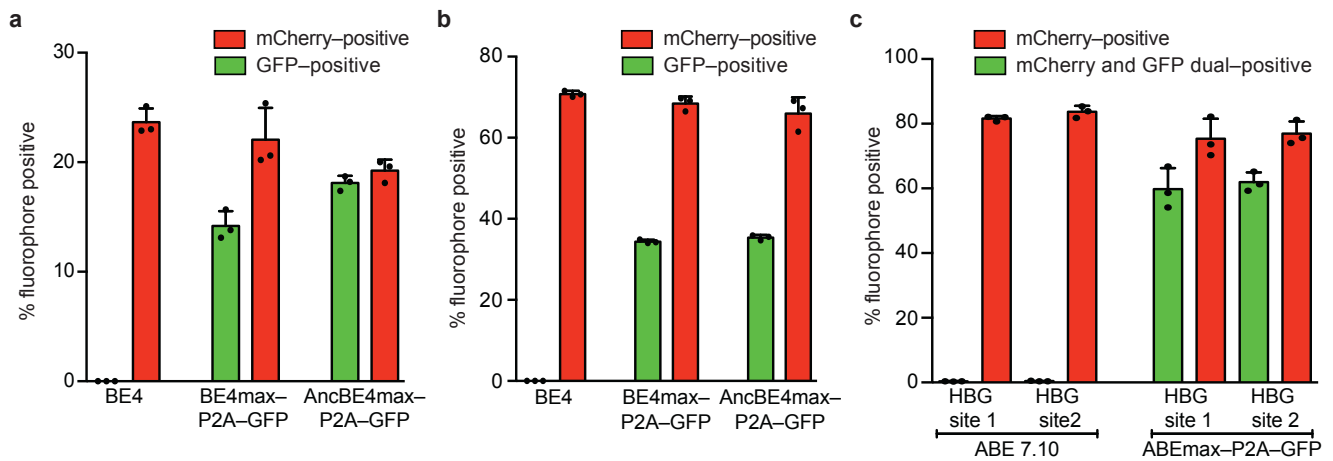

### Supplementary Figure 14

#### Nucleofection and transfection efficiencies in type 1f fibroblasts, N2a cells, and HEK293T cells for disease-associated targets

(a) Congenital disorder of glycosylation type 1f fibroblasts were nucleofected with a plasmid encoding mCherry, a plasmid encoding the targeting sgRNA, and a plasmid encoding BE4, BE4max-P2A-GFP, or AncBE4max-P2A-GFP, then sorted after 3 days. (b) N2a cells were transfected with a plasmid encoding mCherry, a plasmid encoding the targeting sgRNA, and a plasmid encoding BE4, BE4max-P2A-GFP, or AncBE4max-P2A-GFP, then sorted after 3 days. (c) HEK293T cells were transfected with a plasmid encoding mCherry, a plasmid encoding the targeting sgRNA, and a plasmid encoding ABE7.10 or ABEmax-P2A-GFP, then sorted after 3 days. Values and error bars represent the mean and standard deviation of n=3 biologically independent experiments (dots) 3 days after transfection.



| Untreated Control | T   | T   | T    | A    | G   | T    | C <sub>7</sub> | C <sub>8</sub> | T   | T   | A    | A    | A    | A    | T   | G   | T    | A    | G    | G   | G   | G   | G   |     |
|-------------------|-----|-----|------|------|-----|------|----------------|----------------|-----|-----|------|------|------|------|-----|-----|------|------|------|-----|-----|-----|-----|-----|
| A                 | 0.0 | 0.0 | 0.0  | 99.9 | 0.0 | 0.0  | 0.0            | 0.0            | 0.0 | 0.0 | 99.9 | 99.9 | 99.9 | 99.9 | 0.0 | 0.0 | 0.0  | 99.9 | 0.0  | 0.0 | 0.0 | 0.0 | 0.0 | 0.0 |
| C                 | 0.0 | 0.0 | 0.0  | 0.0  | 0.0 | 0.0  | 99.9           | 99.9           | 0.0 | 0.0 | 0.0  | 0.0  | 0.1  | 0.0  | 0.0 | 0.0 | 0.0  | 0.0  | 0.0  | 0.0 | 0.0 | 0.0 | 0.0 | 0.0 |
| T                 | 100 | 100 | 99.9 | 0.0  | 0.0 | 99.9 | 0.1            | 0.1            | 100 | 100 | 0.0  | 0.0  | 0.0  | 0.1  | 100 | 0.0 | 99.9 | 0.0  | 0.0  | 0.0 | 0.0 | 0.0 | 0.0 | 0.0 |
| G                 | 0.0 | 0.0 | 0.0  | 0.0  | 100 | 0.0  | 0.0            | 0.0            | 0.0 | 0.0 | 0.0  | 0.0  | 0.0  | 0.0  | 0.0 | 100 | 0.1  | 0.1  | 99.9 | 100 | 100 | 100 | 100 | 100 |

| AncBE4max-P2A-GFP | T   | T   | T   | A    | G   | T    | C <sub>7</sub> | C <sub>8</sub> | T   | T   | A    | A    | A    | A    | T   | G   | T    | A    | G    | G   | G   | G   | G   |     |
|-------------------|-----|-----|-----|------|-----|------|----------------|----------------|-----|-----|------|------|------|------|-----|-----|------|------|------|-----|-----|-----|-----|-----|
| A                 | 0.0 | 0.0 | 0.0 | 99.9 | 0.0 | 0.0  | 0.0            | 0.0            | 0.0 | 0.0 | 99.9 | 99.9 | 99.9 | 99.9 | 0.0 | 0.0 | 0.0  | 99.9 | 0.0  | 0.0 | 0.0 | 0.0 | 0.0 | 0.0 |
| C                 | 0.0 | 0.0 | 0.0 | 0.0  | 0.0 | 0.0  | 0.2            | 0.2            | 0.0 | 0.0 | 0.0  | 0.0  | 0.1  | 0.0  | 0.0 | 0.0 | 0.0  | 0.0  | 0.0  | 0.0 | 0.0 | 0.0 | 0.0 | 0.0 |
| T                 | 100 | 100 | 100 | 0.0  | 0.0 | 99.9 | 99.8           | 99.8           | 100 | 100 | 0.0  | 0.0  | 0.0  | 0.1  | 100 | 0.0 | 99.9 | 0.0  | 0.0  | 0.0 | 0.0 | 0.0 | 0.0 | 0.0 |
| G                 | 0.0 | 0.0 | 0.0 | 0.0  | 100 | 0.0  | 0.0            | 0.0            | 0.0 | 0.0 | 0.0  | 0.1  | 0.0  | 0.0  | 0.0 | 100 | 0.1  | 0.0  | 99.9 | 100 | 100 | 100 | 100 | 100 |

## Supplementary Figure 15

### C•G-to-T•A base editing of the 3' splice acceptor of SCN9a intron 6 in sorted N2a cells

N2a cells were nucleofected with plasmids encoding AncBE4max–P2A–GFP and the targeting sgRNA. Following a 3 day incubation, GFP–positive cells were isolated by FACS and analyzed by HTS. The protospacer of the non-transcribed strand is shown here; C<sub>7</sub> corresponds to +1 G and C<sub>8</sub> corresponds to -1 G of the 3' splice acceptor. The PAM is shown in blue.

a

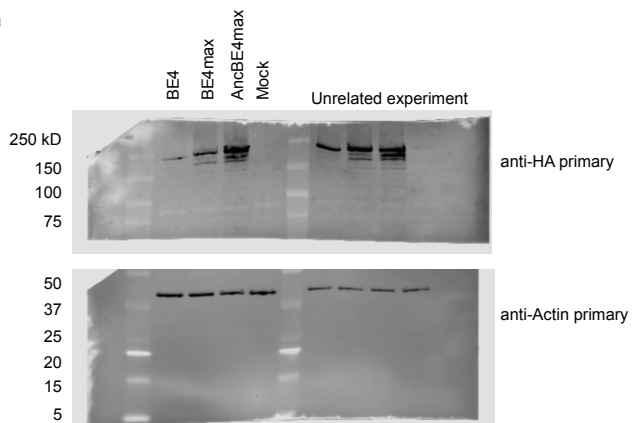

b

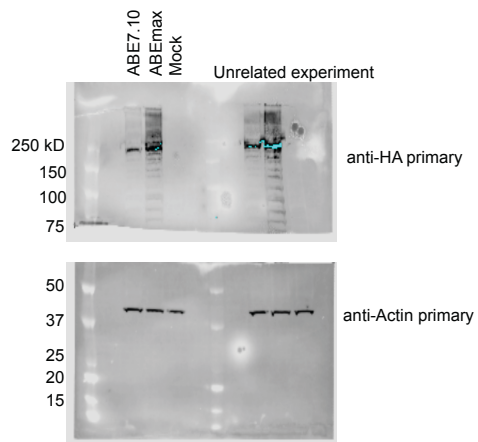

### Supplementary Figure 16

**Original western blots for BE4, BE4max, AncBE4max, ABE7.10, and ABEmax**

Unrelated experiments are of samples not discussed in this work.

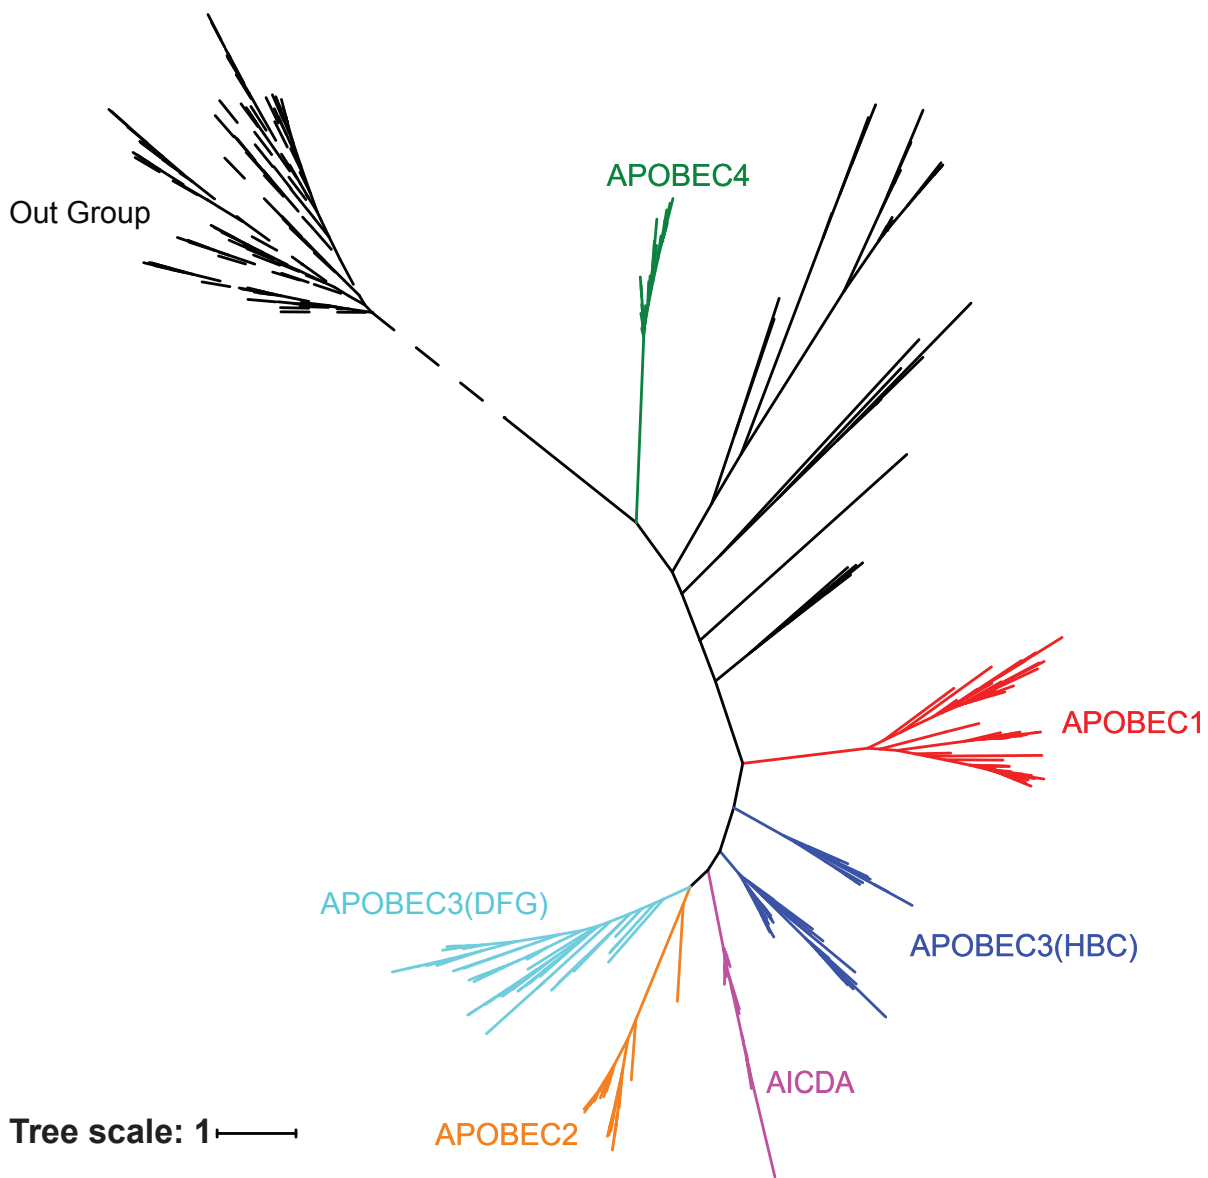

**Supplementary Figure 17**

**468-taxa unrooted phylogeny of APOBEC homologs**

The tree is colored according to the UNIPROT annotation of sequences within each clade. Dotted lines indicate sequences used as an outgroup to root the tree in Figure 1f.

## Supplementary Note 1

### Python script to analyze pathogenic SNPs within the ClinVar database

```
import numpy as np
import pandas as pd

#download latest ClinVar from ftp://ftp.ncbi.nlm.nih.gov/pub/clinvar/tab_delimited/
#convert to csv
ClinVar = pd.read_csv('2018-04-23-variant_summary.csv')

#restrict to SNPs
ClinVar = ClinVar[ClinVar.Type == 'single nucleotide variant']

#restrict to pathogenic
ClinVar = ClinVar[ClinVar.ClinicalSignificance == 'Pathogenic']

#remove nans
ClinVar = ClinVar[ClinVar.ReferenceAllele != 'na']
ClinVar = ClinVar[ClinVar.AlternateAllele != 'na']

#drop duplicates of AlleleID
ClinVar = ClinVar.drop_duplicates('#AlleleID')

#total SNPs in ClinVar
total_SNPs = len(ClinVar)

def SNP_count(cv, ref, alt):
    ClinVar_ref = cv[cv.ReferenceAllele == ref]
    ClinVar_ref_alt = ClinVar_ref[ClinVar_ref.AlternateAllele == alt]
    return len(ClinVar_ref_alt)

counts = np.array([[",", 'A', 'T', 'G', 'C'],
    ['A', 0, SNP_count(ClinVar, 'A', 'T'), SNP_count(ClinVar, 'A', 'G'), SNP_count(ClinVar, 'A', 'C')],
    ['T', SNP_count(ClinVar, 'T', 'A'), 0, SNP_count(ClinVar, 'T', 'G'), SNP_count(ClinVar, 'T', 'C')],
    ['G', SNP_count(ClinVar, 'G', 'A'), SNP_count(ClinVar, 'G', 'T'), 0, SNP_count(ClinVar, 'G', 'C')],
    ['C', SNP_count(ClinVar, 'C', 'A'), SNP_count(ClinVar, 'C', 'T'), SNP_count(ClinVar, 'C', 'G'), 0]
    ])

np.savetxt('ClinVar_SNPs.csv', counts, fmt='%5s', delimiter=',')
```

# Supplementary Sequences 1

## APOBEC homologs used for ancestral reconstruction

>A7T128\_NEMVE/51-294  
LGKEFCGAFYHPRSKSQCAIAKRGHADLTRYRYTNSKKHAEFFLMDIDCQARHFVWKKQWIMYLMQVCHSTDGGTKEDQSCCEVMKAIKEKLNVEIKPHTLQVQKGGKPEKGVKRLKTTGIELECMKEGDWYKQAPEENPYDTSKTEELHNOQLEQ

>D8M4Y9\_BLAHO/46-382  
CMATGTCVGAQAQSPGEGFVNDCHAEVLRRRFSFIHYLIKEIQKVFPECEGDFHLQVKRDYHFYMYISQSPCGYGSSEYETNGKAMEQSCSDKLLISPIYLTGIVCWDEARMKNALADRIEVAIVVWFFKEVQYKEIKRERYEQAKESLMK

>I1F5T9\_AMPQE/52-472  
SLGTGSKCIGEHKMSLEGLVNDSHAEIARRGFVYLIQGLKSIFERSPIKQYSIKNGGDASIFLSTKHSSCSDKMMRLDIPVYLSHTVELYNQEMERALVGRLLCSKELLGSIWVSDFKELVQNDLPVYDQKSSYQKARTLFN

>E9GMF4\_DAPPU/61-428  
SMGTGSKCVGQNLKSGDGLINDSHAEVARRRGLFRYMYHQMEILFTVDAISKFLQREGVSIFFSSHTPCGDASIIIVKENSIMCNSCSDKLAFLSKPIYVSHVVICPYQSVMERALINRFEHSANQLSSISWQKFSLLSDNLPYKAKRCLCYFEMWEQTRA

>K7J168\_NASVI/49-389  
SLGTGTCIGSELNRSKGLSDSHAEILARRAFRLRYLHQIELIFLEDNGIKLRDVSFFHSSQTPCGDCSIIKLTGEDLSCSDKLAKLMIPTIKFESIVICPYSLESMQRGIFQRPDSSIVWKTFLTYDPOHPKYHYCKQYSYQNLWREKS

>F4X2X4\_ACREC/49-389  
ALATGTCIGSELNRSKGLSDSHAEVLRRAFRIRYLDQIDLFSRNDKNIELNSIFHFFSSQTPCGDCSIFKEITSDSCSDKMAKLMIPPIKLESITICPFLDAMERGLYKRFNNSIIWQSLQIFDIRHPKYDYWKQWSYQNEWKQLKH

>E9IK04\_SOLIN/50-395  
ALATGTCIGSELNRSKGLSDSHAEVLRRAFRIRYLDQIDLFSRNDKNIELNSIFHFFSSQTPCGDCSIFKEITSDSCSDKMAKLMIPPIKLESITICPFLDAMERGLYKRFNNSIIWQSLQIFDIRHPKYDYWKQWSYQNEWKRLRR

>E2AUE8\_CAMFO/49-391  
ALATGTCIGSELNRSKGLSDSHAEVLRRAFRIRYLDQIDLFSRNDKNIELNSIFHFFSSQTPCGDCSIFKEITSDSCSDKMAKLMIPPIKLESITICPFLDAMERGLYKRFNNSIIWQSLQIFDIRHPKYDYWKQWSYQNEWKQLKH

>E2B4R0\_HARSA/49-389  
ALATGTCIGSELNRSKGLSDSHAEVLRRAFRIRYLDQIDLFSRNDKNIELNSIFHFFSSQTPCGDCSIFKEITSDSCSDKMAKLMIPPIKLESITICPFLDAMERGLYKRFNNSIIWQSLQIFDIRHPKYDYWKQWSYQNEWKQLKH

>B0WXP1\_CULQU/53-394  
SLGTGTCIGADLSEKGLINDSHAEVARRRGLFRVMMQMTSIFEFNSESRRKFSCKSGISFHFTTHSPCGDASIIYETSRSSCSDKMARLLERPIYLESVITDFCKEAIERALWKRWDVWVEGGGVWATFAAVWKGADMDYVDVKNRSYREQWDALRV

>B4NPW3\_DROWI/50-393  
SLGCGTKCIGQDKQCPKGLINDSHAEIARRAFRLRYLHNLKIFSWQTAERCFTLNENLVFHLSTQTPCGDACILENIDTSCSDKLRLLNPKPIYFTSFNFADHLKSLQALYQRWNGRSCNSLIWLNFLNLLNQLYAQCKALAYQLVWQQLKQ

>B4JXC0\_DROGR/56-405  
SLATGTRCIGSSKLCARGFILNDCHAEVLRRAFRIRYLDQIDLFSRNDKNIELNSIFHFFSSQTPCGDCSIFKEITSDSCSDKMAKLMIPPIKLESITICPFLDAMERGLYKRFNNSIIWQSLQIFDIRHPKYDYWKQWSYQNEWKQLKH

>B4M8L0\_DROVI/67-417  
ALATGTRCIGASKLCAKGFVINDSHAEVLRRAFRIRYLDQIDLFSRNDKNIELNSIFHFFSSQTPCGDCSIFKEITSDSCSDKMAKLMIPPIKLESITICPFLDAMERGLYKRFNNSIIWQSLQIFDIRHPKYDYWKQWSYQNEWKQLKH

>B4KIX6\_DROMO/54-403  
ALATGTRCIGASKLCAKGFVINDSHAEVLRRAFRIRYLDQIDLFSRNDKNIELNSIFHFFSSQTPCGDCSIFKEITSDSCSDKMAKLMIPPIKLESITICPFLDAMERGLYKRFNNSIIWQSLQIFDIRHPKYDYWKQWSYQNEWKQLKH

>Q29K71\_DROPS/55-392  
ALGCGTKCIGYTRHCPKGFVINDSHAEVLRRAFRIRYLDQIDLFSRNDKNIELNSIFHFFSSQTPCGDCSIFKEITSDSCSDKMAKLMIPPIKLESITICPFLDAMERGLYKRFNNSIIWQSLQIFDIRHPKYDYWKQWSYQNEWKQLKH

>B3MN31\_DROAN/55-389  
ALGCGTKCIGYTRHCPKGFVINDSHAEVLRRAFRIRYLDQIDLFSRNDKNIELNSIFHFFSSQTPCGDCSIFKEITSDSCSDKMAKLMIPPIKLESITICPFLDAMERGLYKRFNNSIIWQSLQIFDIRHPKYDYWKQWSYQNEWKQLKH

>B4HX96\_DROSE/54-382  
SLGCGTKCIGESKLCPKGLINDSHAEVLRRAFRIRYLDQIDLFSRNDKNIELNSIFHFFSSQTPCGDCSIFKEITSDSCSDKMAKLMIPPIKLESITICPFLDAMERGLYKRFNNSIIWQSLQIFDIRHPKYDYWKQWSYQNEWKQLKH

>H2YAA2\_CIOSA/58-486  
AIGSGTTCIGESQMRPDLGLHDSHAEVIARRSFIRYLYHEIKSIFNKLIDGKCCLPKISFHFTSNTPCGDATIFVTNQPNTSCSDKILRVLSTPVYMRSSIVADIQALRRAFYGRMDLNSLDFALSWMRKFEMCELSYRNKLLAYFNWTSWVKD

>C3YR83\_BRAF/55-488  
AMGTGTCIGRSKMRLEGLVHDSHAEIARRAFRLRYLHNLKIFSWQTAERCFTLNENLVFHLSTQTPCGDACILENIDTSCSDKLRLLNPKPIYFTSFNFADHLKSLQALYQRWNGRSCNSLIWLNFLNLLNQLYAQCKALAYQLVWQQLKQ

>F1R076\_DANRE/54-459  
SLGTGTCIGRSAMSMKGDVLDHDSHAEVIARRSVRYLQELKVFAGSEKGRWLRKAGVSLFFSTQTPCGDASIFMSGSEPCETSCSDKLARLYQALYFSAVLVSPYHPALRRALHTRCSHVKDLAASWHSFLKVVAAELPEYWDYKQAAQYQAWTQLRL

>H2S4J7\_TAKRU/61-472  
SLATGTCIGRTALSPNGDVLNDHDSHAEVIARRSVRYLQELKVFAGSEKGRWLRKAGVSLFFSTQTPCGDASIFMSGSEPCETSCSDKLARLYQALYFSAVLVSPYHPALRRALHTRCSHVKDLAASWHSFLKVVAAELPEYWDYKQAAQYQAWTQLRL

>ADAT1\_XENTR/59-465  
AMGTGTCIGQAKLRKTDGDLQDSDHAEIARRSFQRYLLHQLLFIPIGTGKWKMLRPEISFVFTSHTPCGDASIIIVISHELGHGSCSDKMARFLQPIYLSAVVVCPSQDAMERALYNRCHKVLSLAAVSWNTFRELQKORSEYWDYKAAAYQEAWNCLRQ

>U3JIM9\_FICAL/63-494  
AMGTGTCIGRNRKMRKTDGDLNDHDSHAEVIARRSFQRYLLHQLLFIPIGTGKWKMLRPEISFVFTSHTPCGDASIIIVISHELGHGSCSDKMARFLQPIYLSAVVVCPSQDAMERALYNRCHKVLSLAAVSWNTFRELQKORSEYWDYKAAAYQEAWNCLRQ

>ADAT1\_CHICK/63-496  
ALGTGTCIGLNRKMRKTDGDLNDHDSHAEVIARRSFQRYLLHQLLFIPIGTGKWKMLRPEISFVFTSHTPCGDASIIIVISHELGHGSCSDKMARFLQPIYLSAVVVCPSQDAMERALYNRCHKVLSLAAVSWNTFRELQKORSEYWDYKAAAYQEAWNCLRQ

>U3IY34\_ANAPL/63-495  
AMGTGTCIGQNRKMRKTDGDLNDHDSHAEVIARRSFQRYLLHQLLFIPIGTGKWKMLRPEISFVFTSHTPCGDASIIIVISHELGHGSCSDKMARFLQPIYLSAVVVCPSQDAMERALYNRCHKVLSLAAVSWNTFRELQKORSEYWDYKAAAYQEAWNCLRQ

>F7EEN0\_ORNAN/78-517  
AMGTGTCIGQSKMRKGDGLINDSHAEVIARRSFQRYLLHQLLFIPIGTGKWKMLRPEISFVFTSHTPCGDASIIIVISHELGHGSCSDKMARFLQPIYLSAVVVCPSQDAMERALYNRCHKVLSLAAVSWNTFRELQKORSEYWDYKAAAYQEAWNCLRQ

>F7G3V9\_MONDO/64-497  
SMGTGTCIGLSKMRKNGDGLINDSHAEVIARRSFQRYLLHQLLFIPIGTGKWKMLRPEISFVFTSHTPCGDASIIIVISHELGHGSCSDKMARFLQPIYLSAVVVCPSQDAMERALYNRCHKVLSLAAVSWNTFRELQKORSEYWDYKAAAYQEAWNCLRQ

>G1T9N5\_RABIT/63-492  
SMGTGTCIGQSKMRKNGDGLINDSHAEVIARRSFQRYLLHQLLFIPIGTGKWKMLRPEISFVFTSHTPCGDASIIIVISHELGHGSCSDKMARFLQPIYLSAVVVCPSQDAMERALYNRCHKVLSLAAVSWNTFRELQKORSEYWDYKAAAYQEAWNCLRQ

>G1Q6Y1\_MYOLU/63-485  
SMGTGTCIGQSKMRKNGDGLINDSHAEVIARRSFQRYLLHQLLFIPIGTGKWKMLRPEISFVFTSHTPCGDASIIIVISHELGHGSCSDKMARFLQPIYLSAVVVCPSQDAMERALYNRCHKVLSLAAVSWNTFRELQKORSEYWDYKAAAYQEAWNCLRQ

>F6Z5W8\_HORSE/63-490  
SMGTGTCIGQSKMRKNGDGLINDSHAEVIARRSFQRYLLHQLLFIPIGTGKWKMLRPEISFVFTSHTPCGDASIIIVISHELGHGSCSDKMARFLQPIYLSAVVVCPSQDAMERALYNRCHKVLSLAAVSWNTFRELQKORSEYWDYKAAAYQEAWNCLRQ

>M3YEQ1\_MUSPF/71-497  
SMGTGTCIGQSKMRKNGDGLINDSHAEVIARRSFQRYLLHQLLFIPIGTGKWKMLRPEISFVFTSHTPCGDASIIIVISHELGHGSCSDKMARFLQPIYLSAVVVCPSQDAMERALYNRCHKVLSLAAVSWNTFRELQKORSEYWDYKAAAYQEAWNCLRQ

>ADAT1\_MOUSE/63-492  
SMGTGTCIGQSKMRKNGDGLINDSHAEVIARRSFQRYLLHQLLFIPIGTGKWKMLRPEISFVFTSHTPCGDASIIIVISHELGHGSCSDKMARFLQPIYLSAVVVCPSQDAMERALYNRCHKVLSLAAVSWNTFRELQKORSEYWDYKAAAYQEAWNCLRQ

>H0VKI8\_CAVPO/62-489  
SMGTGTCIGQSKMRKNGDGLINDSHAEVIARRSFQRYLLHQLLFIPIGTGKWKMLRPEISFVFTSHTPCGDASIIIVISHELGHGSCSDKMARFLQPIYLSAVVVCPSQDAMERALYNRCHKVLSLAAVSWNTFRELQKORSEYWDYKAAAYQEAWNCLRQ

>G7Q1N8\_MACFA/63-495  
SMGTGTCIGQSKMRKNGDGLINDSHAEVIARRSFQRYLLHQLLFIPIGTGKWKMLRPEISFVFTSHTPCGDASIIIVISHELGHGSCSDKMARFLQPIYLSAVVVCPSQDAMERALYNRCHKVLSLAAVSWNTFRELQKORSEYWDYKAAAYQEAWNCLRQ

>I3MW85\_ICTTR/63-492  
SMGTGTCIGQSKMRKNGDGLINDSHAEVIARRSFQRYLLHQLLFIPIGTGKWKMLRPEISFVFTSHTPCGDASIIIVISHELGHGSCSDKMARFLQPIYLSAVVVCPSQDAMERALYNRCHKVLSLAAVSWNTFRELQKORSEYWDYKAAAYQEAWNCLRQ

>D8SUQ7\_SELMU/51-383  
ALGTGTCIGSGQRSLAGDTINDCHAEVIARRLLKLLYTDIGSNGRLMRPEIRLHLYISQSPGDCAGVSDSCDKIARFLNEPVYITITVSDLACIALQRATFGRLLCSVARNYSISWRSFRHLLTHFFPGYLECKKAYLEAKEILLH

>MOSLB0\_MUSAM/69-408  
ALGTGKICIGGSLSPRTGDVVNDSHAEIARRSLRFFYAEIERAFDTSCCGQTKYRMPNGWGLHLYITQLPCGVFSYPTLRELSFCFNKITRILQPVVYLTSTLTVSKTNYLEKAIYDCMERLHIKYSICWEVFSVLSQRSLSLQYHGLKAMAYQSSLLKMR

>M1BYG7\_SOLTU/64-418  
SLGTGKICIGRSRRSSKGDVVNDSHAEIARRALLRFLYSEIQDMFESDGLTKLKMKGHWQLHLYISQLPCGVASPGSELAHDSMSCSDKIARFLPIYFISVTISIEDEVMAHERVPLSNKYSICWESFSLSHNCVGEYRELKDKSYNLASETFK

>K7KC56\_SOYBN/58-388  
AMGTGKICIGRSLRRTCGDVVHDSHAEIARRLIRFFYTIQPPFDGCLNKGKYSLKDKDWKLMHYISQLPCGDASLSVPLSCSDKIARFLQPVVYLSITVFRLEDSLKRALYERMLPLSNEYSCICWEVFLSLGPNELGYRELKDGAYHLASKIFK

>F4HU58\_ARATH/50-411  
ALGTGKICIGRSLRPRGDIIVNDSHAEVARRALIRFFYSEIQRSDSSCPGEVYKYLKSGCLLHLYISQLPCGYASTSSPLYKIKSCSDKIARVLQPVVYITITVFLADHLRRLSYERILPLSDEYSLCWELFLKETHGHKREYRELKKNKAYLMSKIFK

>W4XXD3\_STRPU/717-1055  
SLGTGNRCVTDGKLSMEGRVNDSHAEIITRAFLRFLYLNQLQAILTOGTNGKLRLLPDVSLHLYISTAPCGDGAQFRTDENESSCDKVASFIEPMYLSSISLSLYHHGLARAVCCRVSELDNLLSINWSEYQTCRFLDRYTHDAKLSAYYAKQYLK

>1IGJ01\_AMP0E/629-965  
SFGTGTASGDLLDKGEVDFDASHAEIARRGLKMLFYQELQVIFEANEDGKLRVKSIFKFLYISTAPCGDGAQFRLRDLNRLSSCDKIGSFVEPVYFLSLSLHHHGHLSRAVCCRFHELGPYLSMNNWFLSLSVSSGHTYAEAKSLAYQEAQGLLHK

>A7REZ9\_NEMVE/161-491  
SLGAGNRCVTGQRLSMEGKVVNDSHAEIARRSLRFFYQALHAIFEKNNSRRLAVRQGVSFHLYISTAPCGDGFALTPRENTDLSKSDKICRFIEPVYLESLLTYLYDHGHLARAVCCRLQDLGAELSVNWESFKELQRTDREYSQAKQMAFQNAKRELFE

>K1PWV0\_CRAGI/737-1070  
SIGTGNRCITGPQLSLEGNVNDSHAEIITRRGFIRMFYKQLQALFEPSPGKLRKDNITFHLYISTAPCGDGFALSPRDSNNACTDKLRLMDPVYLDLSTLLYDHGHLARAMCCRLARDINSLSVNWDNFQVADLKGQYKAKTAFAQTAKKALIK

>T1J5P4\_STRMM/754-1087  
SMGTGNRCISGERLSQELVNDSHAEIVTRRGLRFLYKQIEFEPSENKFRVQPDVTFHLYISTAPCGDGFALSKTDVSELSKSDKIARVDPYIYITLTYLYDHGHLARAVCCRLSELDTLHLSWASFKACIKHQRDYLYVKTAAQKAKVLLLE

>M4A7Z3\_XIPMA/994-1320  
SLGTGNRCVKEGELSLKGETVNDCHAEIISRRGFIRFLYSELKIFEPAEENKLIKPDITFHLYISTAPCGDGFALDCSEKSCDKILRFLHPYIKSITLYSHGHLTRAVCCRLARAFQNSVNWFLRCLRQCRCRGTYAQAQTSFAQLAQQFFE

>M3XGS0\_LATCH/812-1140  
SIGTGNRCVKEGELSLKGETVNDCHAEIISRRGFIRFLYSELKMFLEVSDGRMKIKTGVTFHLYISTAPCGDGFALDCSEKSCDKILRFLHPVYLSVTLTYLYSQHGLARAIICRMSRAFAQEGSSVNWQLFQOICTKTRDYQEAKEAFAKAVHFVQ

>U3IQ71\_ANAPL/729-1061  
SIGTGNRCVKEGELSLKGETVNDCHAEIISRRGFIRFLYSELKMFIEPAGKRLKIKSNVTFHLYISTAPCGDGFALDCSDKSCDKILRFLHPVYLSVTLTYLYSQHGLTRAIICRMRVLRQKRSVNWALFQOLCAKNKRYSEAKAAYQEAQRFFS

>F6ZMB0\_XENTR/760-1089  
SIGTGNRCVKEGELSLRGETVNDCHAEIVSRGFISNTIXSQLMKIFEEAGDLLRVRPGVTFHLYISTAPCGDGFALDCSDKSCDKILRFLHPVYLSVTLTYLYSQHGLTRAIICRMSRAFAQNSVNWTLFQQLSVLRGRHYSOVKATAYQAKGQLFR

>F7GM99\_MACMU/591-920  
SLGTGNRCVKGDSLSLKGETVNDCHAEIISRRGFIRFLYSELKMFIEPAGKGEKLIKQIKTVPFHLYISTAPCGDGFALDCSDKSCDKILRFLHPVYLSVTLTYLYSQHGLTRAIICRMRVLRQKRSVNWALFQOLCAKNKRYSEAKAAYQEAQRFFS

>C3YCU6\_BRAFL/320-659  
AMGTGNSCYMGNKIGTDGRTLNDCHAEVVRRLRFLYRELKIFEKHSLSLLYKEGVSFHLTYLTPAGDAAHTITRDRVQSCSDKLAKEFIEPVYLSVTFITNYDHGQLSRALCCRDIHISADISLNMWFRKAMCTLARRQYNQAKMCMYQEAQRQLYD

>H3ABU2\_LATCH/179-499  
ALGTGNSCYAGWLAFLDGRLLHDCHALVVRRLRFLYKQLLLIFCSPGGSLSLRPFIFFHLVYKVPGEAARTFMYPAPRNPSESDKMTFRFIQPIYITSVLHFVDRNTVSVQVINKRLEGALIRKSSLNWSSFRKVAEKTGRSYHSVKLRAQYKVKQVNC

>H9G4E7\_ANOCA/55-372  
ALGTGIDYICEGWMEFNGRRVDMHGMVARRVLLRFLYKQLLLIFCPAGDILAKPKYFLHLYSRTPSGASENFHLPVQSGSDKLRILPVIYITSVLPYQDHTVLHEVNDRVQLGPNGLSLNWSMFRKVVQEMKREYHKGVQAYQSAKLQMYT

>G1NZA7\_MYOLU/269-591  
ALGTGSSCAGWLEFSGRQLHDCHGLVARRALLRFLYRQLLLVLPQPGPFVLPKPRIFHYIYISNTPKGAAHDYPPAASADKLSRFLPPLYATSLVLPCHDPPTLSSAIHTRLDVRSVGSCLSLNWRARFQAAGALGKSYEAKAYQEARQQLS

>F1MBB2\_RAT/237-552  
ALGTGSSCAGWLEFSGRRLHDCHGLVIARRALLRFFRQLLLVLPQPGSGFALKPGVFLHLYVSNTPKGAADHYLSPASADKLARFLPPLYATSLVLPCHDPPTLNRHAIHRLDVLGCLSLNWRARFQVAVARALEKPYEAKAYQEARQQLS

>H0X0C9\_OTOGA/275-589  
ALGTGNSCAGWLEFSGRQLHDCHALVARRALLRFLYRQLLLVLPQPGPFVLPKPRIFHYIYISNTPKGAAHDYIYASSTASADKLARFLPPLYATSLVLPCHDPSTLRAIHSRLDGLGVLNWRARFQAAGALGKPYEAKAYQEARRRLS

>F6QYL4\_MACMU/258-573  
ALGTGSSCAGWLEFSGQQLHDCHGLVIARRALLRFLYRQLLLVLPQPGPFVLPKPRVFLHLYISNTPKGAARDYIYSPASADKLARVPLVYSTSLILSCHEDPPTLRAIHTRLDVLGCLSLNWRARFQVAVARALEKPYEAKAYQEARQQLS

>H3A635\_LATCH/258-579  
ALGTGDFNYSQCICRDRVHDSHGVMMARRSLRFLYRQLLLIFCIEPTSKLTIPNANIHLNQLPKGAAQIKSQRPSQSASDKLTRFQIPVYISSVLIANCTDRGLEIAVKQRVDDALTSKLSLNWSRFLNLAKEAKYHAACKMSYQEAQCKLKS

>H2PE88\_PONAB/193-512  
AIGTGEYNSQDIKPNRVLHDTHAVTARRSLRFLYRQLLLIFCIEPTSNLTKQINICLYMNLPKGSAQIKSQRPHSESSDKLTRFQIPVYISSILVGNCSDRGLEIAIKQRVDDALTSKLSLNWSRFLNLAKEAKYHAACKMSYQEAQCKLKS

>H0VR27\_CAVPO/289-609  
AVGTGEYNSQCICPNRVLHDTHGVVARRSLRFLYRQLLLIFCIEPTASDLTKQDINIYLMNQLPKGSAQIKSQRPNSESSDKLTRFQIPVYISSILVGNCSDRGLEIAIKQRVDDALTSKLSLNWSRFLNLAKEAKYHAACKMSYQEAQCKLKS

>G1NDQ0\_MELGA/165-484  
ALGTGDCNYSNDYSPGRVHDSHAIVTARRSLRFLYRQLLLIFCTAPDSKLTLRNISIYLMNQLPKGSAQIKSQRPNSESSDKLTKFIEPVYISNTLGNCRSLKLEIAIRQRIDDALTSKLSLNWSRFLNLAKEAKYHAACKMSYQEAQCKLKS

>U3IGD7\_ANAPL/256-575  
ALGTGDCNYSQDYPNQRVLDHSHAVTARRSLRFLYRQLLLIFCTAPGSKLTKRNITSLYMNQLPKGSAQIKSQRPNSESSDKLTKFIEPVYISNTLGNCRSLKLEIAIRQRIDDALTSKLSLNWSRFLNLAKEAKYHAACKMSYQEAQCKLKS

>H0YU0\_TAEQU/165-484  
ALGTGECNYSRRFESCGRLLHDHSHAVTARRSLRFLYRQLLLIFCTAPGSKLTKRNITSLYMNQLPKGSAQIKSQRPNSESSDKLTKFIEPVYISNTLGNCRSLKLEIAIRQRIDDALTSKLSLNWSRFLNLAKEAKYHAACKMSYQEAQCKLKS

>W5M4T6\_LEPOC/238-558  
AIGTGDNTNQHATANGRLLHDHSHAVTARRSLRFLYRQLLLIFQDLNSQLTKRNITSLYMNQLPKGSAQIKSQRPNSESSDKLTKFIEPVYISNTLGNCRSLKLEIAIRQRIDDALTSKLSLNWSRFLNLAKEAKYHAACKMSYQEAQCKLKS

>F1RC56\_DANRE/229-549  
ALGTGSSNTKASPAPTGRILHDHSHAVTARRSLRFLYRQLLLIFQDDETTKLSFNHITLHLYSLQPKGSAQIKSQRPNSESSDKLTKFIEPVYISNTLGNCRSLKLEIAIRQRIDDALTSKLSLNWSRFLNLAKEAKYHAACKMSYQEAQCKLKS

>W5LAE0\_ASTMX/254-574  
ALGTGNLTKESLTPSGRILHDHSHAVTARRSLRFLYRQLLLIFQDQNTKLSKSHITLHLYLNQLPKGAAQIPSHLRPLNSATDKITQFIEPVYISSILIESCSDTRGMEVAINQRVDGITSKLSLNWSRFLNLAKEAKYHAACKMSYQEAQCKLKS

>H2NZY7\_ORYLA/166-486  
ALGTGDFNTRESISDGRVHDSHAVTARRSLRFLYRQLLLIFQDQNTKLSKSHITLHLYLNQLPKGAAQIPSHLRPLNSATDKITQFIEPVYISSILIESCSDTRGMEVAINQRVDGITSKLSLNWSRFLNLAKEAKYHAACKMSYQEAQCKLKS

>G3PWS7\_GASAC/162-482  
ALGTGNFNAKESASTGGRVHDSHALVSARRSLRFLYRQLLLIFQDQNTKLSKSHITLHLYLNQLPKGAAQIPSHLRPLNSATDKITQFIEPVYISSILVGVCSQSDVRLGKMSVSRVEGITSQLGINWHRFKLVAKEARRLYREAKRMAYQEAQCKLKS

>E4WSB5\_OIKDI/481-800  
ALGTGKTMTDYISSIGTAVIDCHGEIISRRNLKRYFAELQKIFERKDGQFALRDGKIFHLYINTTCDGARVFNPNDFESSCSDKVMRLIEPIYLSISGLYHRQHPFRAMFERIDDGLDFINWQLLYGATKIYLDKLNLSYQSVKNGLYE

>X1WRM4\_ACYPI/235-549  
CLATGKICIGSGLSLSGESLHDCHAEIITRCLLKFFYKELMEIFVSGDKFKLAEDIAFHYINTAPCGEARVFSFCDENSCSDKLTFLIEPTYESISVFNINHMKRTYIGRVENSIDKYCVNWKEYIKLCSLSTLYDLKKNKYIAAKNQILS

>H3EE4\_XPRIPA/256-594  
SLATGNKICIKATSLSFDGCAVNDCHAEIITRGLRVLRYLTVQVLLVEQEGEGLKLRKRFSLHLFISTAPCGDGRVYQFSGNKNDCSDKVLKFLHLLICLSIYLSLALHFTRESCIRACRYGRVARFKPVSANWTRFAALTPYDKVRSAYSKTQFELIR

>H2W2W9\_CAEJA/169-490  
SLSTGNKGLRGDKVSDGTALIDCHAEIITRGLRVLRYLTVQVLLVEQEGEGLKLRKRFSLHLFISTAPCGDGRVYQFSGNKNDCSDKVLKFLHLLICLSIYLSLALHFTRESCIRACRYGRVARFKPVSANWTRFAALTPYDKVRSAYSKTQFELIR

>A8WK36\_CAEBR/168-488  
SLATGNKGLRGDQITSDGSALIDCHAEIITRGLRVLRYLTVQVLLVEQEGEGLKLRKRFSLHLFISTAPCGDGRVYQFSGNKNDCSDKVLKFLHLLICLSIYLSLALHFTRESCIRACRYGRVARFKPVSANWTRFAALTPYDKVRSAYSKTQFELIR

>G0MG92\_CAEBE/170-489

SLATGNKGLSGDKIRSDGSLDICHAEILAKRGLMRFLYSEVLFKIFLESGLILKLGTFHLINTAPCGTARVDKMKRNPESSCDKLLRFMNPYYSSIAVEKSNFERMNRAVNDRAAGSMNWELMKVCTLAKIYEELKAGSYAATKKEFYA

>E3NFH7\_CAERE/177-503  
SLSTGNKGLRGDKIVNDGSLDICHAEILARRGLRFLYSEVLIKIFERGLTVLKKGLHFLINTAPCGTARVDRMKTAEASCSDKLLRFIEPIYYSIAVEQNNFDRLNKAVFARAANGSMNWELMMACTKLTQYDELKAGSYLNAKQSFIK

>ADR2\_CAEL/167-486  
ALSTGNKGLRGDKIVNDGSLDICHAEILARRGLRFLYSEVLIKIFTKGKLVKPGISFHLINTAPCGVARIDKLLKTSNDCSDKLLRFIDPIYYSIAVELNADRLRKAVYSRAATSSMNWELMITICTLTKTYEELKAGSYAAAKKSFT

>A7SFG1\_NEMVE/255-570  
SIGTGTKFISGEYISDKYAVNDCHGEIARRGLRFLYQLELIFELFKPSYGLKDQVEFHLIYSTPCGDARVFSPEHEEKSCSDKICKFIEPYYTSSILSLRYNHMARAMYERVPVEDHSLNWTFLALWARQYDEAKLSAYQKAKASLM

>T1100\_RHOPR/253-578  
SVGTGTKCVGGEHISVKGAVLNDCHAEIARRGLRFLYQLELIFIRNEDGQFCKLPEIRFHLIYSTPCGDARIFSPHDNTSSCDKVAKFIPIYHSIVSLFHQTHLRRALYGRIENTLGHISINWIKFHELLRKTGITYSDAKELVYKDAKTYMIA

>D6X3T2\_TRICA/272-590  
SVTTGTKISGEHISMNGCSLNDMAEILSRRLTYFYDQLELIFQREDEGKYLKPGLDFHLINTAPCGDARIFSPHEEASCSKDIARFIEPIYKLSIVLSLMREAHMYRALCGRIENTIQGFVAVWKRFRALVGSVTEIYCDVKDAVYKAAKTNLYE

>E2BL35\_HARSA/335-651  
CVTTGTKCVSGEHLSVSGGAVNDCHAEIVARRCLCEYLKQLELILEPAKKGFKLKQIQFHLINTAPCGDARIFSPHEEASCSKDIARFIEPIYHSIVLSLNPESHMYRAVCGRIENTIQGFSVNWRRFNLLGTIEDVYLEAKLSVYSLAKRQLKD

>B4MGV3\_DROVI/350-668  
SVSTGTKCVSGEHMSVNGAVLNDCHAEIVARRCLKLYLAQDLIFVRNTDQYKLSVGFHLYINTAPCGDARIFSPHETGASCSDKIARFIEPIYVFDLSLHSDHLSRAVYSRISNIEFVNWKRFLQLCGLTGOSYADAKVYVYQAKQMLF

>Q1709\_AEDAE/283-612  
SLATGTKCVSGEHMSVTGSVNDCHAEIARRGLDFYQDLIFVAPTDTGYLKDGIHFLINTAPCGDARVFSPHENMDASCSDKISRVEPIYHSIVLSLHPAHMYRAICRIENSQIGFSINWRRFAVIEHARYGETKMCVYQAKKELFA

>K1QNQ5\_CRAGI/353-676  
SVSTGTKCVSGEHMSVNGAVLNDCHAEIVARRCLMRYLQKQIFQEGGFKLKNPHIFHLIYSTPCGDARIFSPHETGASCSDKIARFIEPIYVFDLSLHSDHLSRAVYSRISNIEFVNWKRFLQLCGLTGOSYADAKVYVYQAKQMLF

>C3XSL3\_BRAFL/39-363  
SLATGTKCINGEYMSDQGMALNDCHAEIVARRCLRYLYSQLDLVFEPEKDGKYLKDNQIFHLIYSTPCGDARIFSPHETDASCSDKIARFVEPIYHSIVLSLHSDHLSRAVYQRLGELEQFSVNWQCNKLGTTGRHYSEAKLLNQAQKEMVK

>H2QL5\_PANTR/370-731  
SVSTGTKCINGEYMSDRGLALNDCHAEIVARRCLRFLYQLELIFQKSERGFRLKENVQFHLIYSTPCGDARIFSPHELEASCSKDIARFVEPIYSSILSLYHGDHLSRAMYQRISNIEDFSVNWCRWVRVHGLLRSYHESKLAAYQAAKARLFT

>F7DBJ2\_HORSE/369-690  
SISTGTKCINGEYMSDRGLALNDCHAEIARRSLLRFLYQLELIFQKSERGFRLKENVQFHLIYSTPCGDARIFSPHELEASCSKDIARFVEPIYSSILSLYHGDHLSRAMYQRISNIEDFSVNWCRWVRVHGLLRSYHESKLAAYQAAKACLFK

>H3CU13\_TETNG/420-741  
CVSTGTKCINGEYMSDRGLALNDCHAEIARRSLLRFLYQLELIFVHYEKYRKLKNVQFHLIYSTPCGDARIFSPHEEASCSKDIARFVEPIYSSILSLYHADHLSRAMYQRIADIEDFSVNWCRWVRVHGLLRSYHESKLAAYQAAKALIK

>H2NZD8\_ORYLA/315-637  
CISTGTCIDIGEHLSDEGLVNDCHAEIVARRCLRFLYQLELIFRGECEGRFRLKDKQVHLYSASPCGDACIFSPHDVETSCKDKMARFTEPIYSSIVLSYHAAHMSRAMYGRIGLEPFSENWCRWMLHSSFLRVYHQAKRAAYCSAKHTLYR

>I3JK85\_ORENI/388-710  
CVSTGTKCINGEYMSDRGLALNDCHAEIVARRSLLRFLYQLELIFRMRCDNSQFVRKENVQFHLIYSTPCGDARIFSPHEEASCSKDIARFVEPIYSSILSLYHADHLSRAMYQRIEIEEFSVNWCRWVRVHGLLRSYHESKLAAYQAAKATLFR

>H2N9L5\_PONAB/404-725  
ALSSGTKCISGEHLSQDGLVNDCHAEIVARRAFHLFLYQLELIFVRLKEGYRLRENILFHLIYSTPCGDARLHSPYETDFSCDCKIARFVEPIYLSIVLSLHHTGHLARVMSHRMEVGFQFSVNWCRWVRVHGLLRSYHESKLAAYQAAKQQLFK

>F6VCE0\_XENTR/367-729  
ALSSGTKCINGEYMSDQGLVNDCHAEIIVRAFLHFLYQLELIFIRLKEGYRLRENILFHLIYSTPCGDARLHSPYETDFSCDCKITRIFIDPIYLSIVLSLHHTGHLARVMSHRMIEDLGNFSLNWRWARLYGRIGNYQDAKLAHYQSVKQKQMKF

>H3CF5\_TETNG/393-715  
ALSTGTKCINGEYMSDQGLVNDCHAEIVARRRALLRFLYQLELIFIRKERYRLDNHIFMYISTPCGDARLHSPYETDFSCDCKITRIFVEPIYLSIVLSLHHTGHLARVMSHRMIEDLGNFSLNWRWARLYGRIGNYQDAKLAHYQSVKQKQWFR

>W5L18\_ASTMX/382-706  
ALSTGTKCINGEYMSDQGLVNDCHAEIVARRRALLRFLYQLELIFIRKERYRLDNHIFMYISTPCGDARLHSPYETDFSCDCKITRIFVEPIYLSIVLSLHHTGHLARVMSHRMIEDLGNFSLNWRWARLYGRIGNYQDAKLAHYQSVKQKQWFR

>X2BQ53\_DANRE/411-730  
ALSSGTKCINGEYMSDQGLVNDCHAEIITRRALLRFLYQLELIFIRKEDSLRLENLIFHMYISTPCGDARLHSPYETDFSCDCKITRIFVEPIYLSIVLSLHHTGHLARVMSHRMIEDLGNFSLNWRWARLYGRIGNYQDAKLAHYQSVKQKQWFR

>W5N363\_LEPOC/428-750  
AISTGTKCINGEYMSDRGLVNDCHAEIARRAFVFLYQLELIFIRKERYRLDNHIFMYISTPCGDARLHSPYETDFSCDCKITRIFVEPIYLSIVLSLHHTGHLARVMSHRMIEDLGNFSLNWRWARLYGRIGNYQDAKLAHYQSVKQKQWFR

>H2LP25\_ORYLA/349-671  
SLATGTKCLDESDSGRILRDCHAEIVARRRALLRFLYQLELIFVRNKDNFRLEQEGILFHMYSVSSPCGDARLHSPYETDFSCDCKIARFVEPIYLSIVLSLHHTGHLARVMSHRMIEDLGNFSLNWRWARLYGRIGNYQDAKLAHYQSVKQKQWFR

>I3KJ4\_ORENI/382-706  
SLATGTKCLDGGVSDSGCTLDCHAEIVARRRALLRFLYQLELIFIPNCSGDFRLREGVFFHMYSVSSPCGDARLHSPYETDFSCDCKIARFVEPIYLSIVLSLHHTGHLARVMSHRMIEDLGNFSLNWRWARLYGRIGNYQDAKLAHYQSVKQKQWFR

>M3Z42\_XIPMA/284-606  
SLATGTKCLDLDLDRNEDGWTLRDCHAEIVARRRALLRFLYQLELIFVPDKDSTHFRLOEGRIFHMYSVSSPCGDARLHSPYETDFSCDCKIARFVEPIYLSIVLSLHHTGHLARVMSHRMIEDLGNFSLNWRWARLYGRIGNYQDAKLAHYQSVKQKQWFR

>G3PZQ1\_GASAC/403-718  
SLATGTKCRSDGVGDREGTLDCHAEIVARRRALLRFLYQLELIFVNTAGFRLRDGVFFHMYSVSSPCGDARLHSPYETDFSCDCKIARFVEPIYLSIVLSLHHTGHLARVMSHRMIEDLGNFSLNWRWARLYGRIGNYQDAKLAHYQSVKQKQWFR

>H3CRD2\_TETNG/277-601  
SLATGTKCRDRGSAADGAGSLDCHAEIVARRRALLRFLYQLELIFVNTAGFRLRDGVFFHMYSVSSPCGDARLHSPYETDFSCDCKIARFVEPIYLSIVLSLHHTGHLARVMSHRMIEDLGNFSLNWRWARLYGRIGNYQDAKLAHYQSVKQKQWFR

>H2SOX8\_TAKRU/296-626  
SLATGTRCPGRAGARDRAGTLDCHAEIVARRRALLRFLYQLELIFTPNSGGCRLRDGVLFMFVSSPCGDARLHSPYETDFSCDCKIARFVEPIYLSIVLSLHHTGHLARVMSHRMIEDLGNFSLNWRWARLYGRIGNYQDAKLAHYQSVKQKQWFR

>K1RR67\_CRAGI/135-316  
KYPSTRYYKQTCIVCNITTGENTLFLAKSDGKHAEELEELKLVKPKDSTITIFMNDTPCSLHAGDCAKQVQYKTAKVDLTVLTSCESSKKDIIHKLGLKQCTVSPNRDAWQEFIMDLNDWKYKQEKQDGIK

>K1QUE8\_CRAGI/4-176  
NLDHQDWDKAKSCLICKIDNITVEKTEGTHAEFFLQLEKRVNVTIFMNSPCSTPNHTCADKLLKLVDASEVNRMTYVTRLYMIARDGHHAGLQRLKQHACEINAFNKNWEELITKMEFKEYNVRSRKEED

>A0A0W0VFJ2\_9GAMM/61-217  
YGNSKEQLFMLAKIPELFPESRHAENILGFSGIEQFPPEQIRKIDIFLSHSPCSEQGVKCSGSLYNGCDQKLIAGKNDLRSFLFLENSVQVRYHRQFDSAVENFIIQAEKLDKWN

>A0A0W0XR23\_9GAMM/33-206  
ISNELQVSAPKKQRLFLDNDVPAVFPESNHAENLIRFPDVSQFPQIINIFLSHSPCCAEGEKSDARPINGCNKLSVFFKGNALDASLVNFKVQYLYRFNHTVEPFIQAPLLH

>A0A0W0S272\_9GAMM/47-207  
IGNELSKQDTPRKQHFMIKAVPQLFPQHAQHAENLIRGFSIPNKYFNQISQIFLTHSPCSEEGKHSQNSVNGCDKLLTVFVKGNASADVQLFNRTKVVYVYHNFDFKSAVDFEIKAP

>A0A098GDC1\_TATMI/41-209  
IGNELKNSDLDRKQKLFMIGGVQFPFRHSQHAENLIRFPDVSQFPQIINIFLSHSPCCAEGEKSDARPINGCNKLSVFFKGNALDASLVNFKVQYLYRFNHTVEPFIQAPLLH

>A0A0M0LPN3\_9EUKA/47-262  
ERFLNAPLVRKPNLMLRVQSEEMYLCYTRYGANSQHAENLIRFPDVSQFPQIINIFLSHSPCCAEGEKSDARPINGCNKLSVFFKGNALDASLVNFKVQYLYRFNHTVEPFIQAPLLH

>C1E186\_MICCC/53-299  
FFHCSPTEARKTGVVVAALRRGDLRSNSHAEYVVRDEELVRAVAPEDAGTLTYLQRLQPCGHSSDRNCSGSDAVAGHRELLGVSLRVAVSYTYRAHVRGFREGIRVFAADVTEALNAEDWALCEDYAAAFGGVFTAVAHRRAMDE

>A0A0M0K2Z4\_9EUKA/249-414  
PPPNFLAQTREREATGLRLLLYMQPCHSGGRPKALGTCSESLRDFYIKELGVALELVLADYKATEELHREGMRMLAEGITMRAMPADWLDCEPEWAKRGAGPFSKH

>R1E5J9\_EMIHU/273-492  
CGKVVVALEHWRAGSSENVHAESVIADETILSAVVAELTYLQYSPCHSGGRGGGQARQSCTEELIAYHERELNPLSVVADLYKVMELMREGIRRLMSPGMSMRATGEEDWALCDQSYERRGGSFAFGPHVALRAKLD

>A0A0M0LPN3\_9EUKA/390-614  
RGRRRDGPVIVARVLQGSADLYVAYARGRSENVHAEFEMLADPQLLALLDAGGARILRLYMSYQPCHHSGGRKTPEDARKSCSERLAFYEAEMAISELVADLYKAMEDLMRQGILLMVPAGVTMRATDENDWALCDPAYTRGGSFAFSRH

>A0A0M0JB66\_9EUKA/269-499  
VDTRDKTKAQVIVARVLQGNADLYVAYARGRSENVHAEFEMLADPQLLALLDASGARILRLYMSYQPCHHSGGRKTPEDARKSCSERLAFYEAEMAISELVADLYKAMEDLMRQGILLMVPAGVTMRATDENDWALCDPAYETRGGSFAFSRHE

>A0A183I21\_9BILA/199-397  
SCKSFDERGASTMVAACLRTTNGTYQEYRATDNDRRHPEEIFHKMLQARTYVPLTHIIVLPTSPCFHQDCEPQCDVLDACAELAIQVYRQAKTDLKMSVKFLASYGDLYKQGITMMMNAGIDVEPLGMRDWIELVHNDSTYYSWKGLLTSYIRQSEIYI

>A0A077Z854\_TRITR/190-389  
RKLQYRGSSALVAQLTETATYRAFVYSEKTIHVEQKFYHQLMDAANFTMPLREVILYLPSPCFHQDCEPQCDVLDACAELAIQVYRQAKTDLKMSVKFLASYGDLYKQGITMMMNAGIDVEPLGMRDWIELVHNDSTYYSWKGLLTSYIRQSEIYI

>A0A085NPE0\_9BILA/206-389  
AQLTETATYRAFVYSEKTIHVEQKFYHQLMDAANFTMPLREVILYLPSPCFHQDCEPQCDVLDACAELAIQVYRQAKTDLKMSVKFLASYGDLYKQGITMMMNAGIDVEPLGMRDWIELVHNDSTYYSWKGLLTSYIRQSEIYI

>A0A0V0XXU8\_TRIPS/513-708  
LNEQVQKWEHRGASVMVAKLSDDQVYADYFVGDGKPOHQVEQIFYTELMNADQCMATLRQICLFMPTSPCFHQDCEPQCDVLDACAELAIQVYRQAKTDLKMSVKFLASYGDLYKQGITMMMNAGIDVEPLGMRDWIELVHNDSTYYSWKGLLTSYIRQSEIYI

>A0A0V1MSE5\_9BILA/488-683  
LNEQVQKWEHRGASVMVAKLSDDQVYADYFVGDGKPOHQVEQIFYTELMNADQCMATLRQICLFMPTSPCFHQDCEPQCDVLDACAELAIQVYRQAKTDLKMSVKFLASYGDLYKQGITMMMNAGIDVEPLGMRDWIELVHNDSTYYSWKGLLTSYIRQSEIYI

>E5S9I2\_TRISP/108-302  
PNEQVQKWEHRGASVMVAKLSDDQVYADYFVGDGKPOHQVEQIFYTELMNADQCMATLRQICLFMPTSPCFHQDCEPQCDVLDACAELAIQVYRQAKTDLKMSVKFLASYGDLYKQGITMMMNAGIDVEPLGMRDWIELVHNDSTYYSWKGLLTSYIRQSEIYI

>A0A183CD28\_GLOPA/474-665  
VPKHVQNCHEKHESGLIVLTDGDDYVYDFYHESHPHVEEQLVAAIYDLSKYKVDLVEIYFVSKSPCFHQDCEPQCDVLDACAELAIQVYRQAKTDLKMSVKFLASYGDLYKQGITMMMNAGIDVEPLGMRDWIELVHNDSTYYSWKGLLTSYIRQSEIYI

>H3FBK6\_PRIPA/51-311  
FHVPHVQSCHEKHESGLIVLTDGDDYVYDFYHESHPHVEEQLVAAIYDLSKYKVDLVEIYFVSKSPCFHQDCEPQCDVLDACAELAIQVYRQAKTDLKMSVKFLASYGDLYKQGITMMMNAGIDVEPLGMRDWIELVHNDSTYYSWKGLLTSYIRQSEIYI

>A0A0N5AZH9\_9BILA/14-264  
FHIPKHVQSCHEKHESGLIVLTDGDDYVYDFYHESHPHVEEQLVAAIYDLSKYKVDLVEIYFVSKSPCFHQDCEPQCDVLDACAELAIQVYRQAKTDLKMSVKFLASYGDLYKQGITMMMNAGIDVEPLGMRDWIELVHNDSTYYSWKGLLTSYIRQSEIYI

>A0A0B2VFT1\_TOXCA/106-363  
FHVPHVQSCHEKHESGLIVLTDGDDYVYDFYHESHPHVEEQLVAAIYDLSKYKVDLVEIYFVSKSPCFHQDCEPQCDVLDACAELAIQVYRQAKTDLKMSVKFLASYGDLYKQGITMMMNAGIDVEPLGMRDWIELVHNDSTYYSWKGLLTSYIRQSEIYI

>A0A158Q5D3\_DRAME/117-306  
IPKHVQNCHEKHESGLIVLTDGDDYVYDFYHESHPHVEEQLVAAIYDLSKYKVDLVEIYFVSKSPCFHQDCEPQCDVLDACAELAIQVYRQAKTDLKMSVKFLASYGDLYKQGITMMMNAGIDVEPLGMRDWIELVHNDSTYYSWKGLLTSYIRQSEIYI

>A0A0N5CVT8\_THECL/156-346  
VPKHVQNCHEKHESGLIVLTDGDDYVYDFYHESHPHVEEQLVAAIYDLSKYKVDLVEIYFVSKSPCFHQDCEPQCDVLDACAELAIQVYRQAKTDLKMSVKFLASYGDLYKQGITMMMNAGIDVEPLGMRDWIELVHNDSTYYSWKGLLTSYIRQSEIYI

>J0XJ9\_LOALO/138-380  
FHLPHVQSCHEKHESGLIVLTDGDDYVYDFYHESHPHVEEQLVAAIYDLSKYKVDLVEIYFVSKSPCFHQDCEPQCDVLDACAELAIQVYRQAKTDLKMSVKFLASYGDLYKQGITMMMNAGIDVEPLGMRDWIELVHNDSTYYSWKGLLTSYIRQSEIYI

>A0A0K0EN59\_STREER/201-391  
VPKHVQNCHEKHESGLIVLTDGDDYVYDFYHESHPHVEEQLVAAIYDLSKYKVDLVEIYFVSKSPCFHQDCEPQCDVLDACAELAIQVYRQAKTDLKMSVKFLASYGDLYKQGITMMMNAGIDVEPLGMRDWIELVHNDSTYYSWKGLLTSYIRQSEIYI

>H2W477\_CAEJA/255-446  
VPKHVQNCHEKHESGLIVLTDGDDYVYDFYHESHPHVEEQLVAAIYDLSKYKVDLVEIYFVSKSPCFHQDCEPQCDVLDACAELAIQVYRQAKTDLKMSVKFLASYGDLYKQGITMMMNAGIDVEPLGMRDWIELVHNDSTYYSWKGLLTSYIRQSEIYI

>A0A0K0DCY3\_ANGCA/157-328  
IPKHVQNCHEKHESGLIVLTDGDDYVYDFYHESHPHVEEQLVAAIYDLSKYKVDLVEIYFVSKSPCFHQDCEPQCDVLDACAELAIQVYRQAKTDLKMSVKFLASYGDLYKQGITMMMNAGIDVEPLGMRDWIELVHNDSTYYSWKGLLTSYIRQSEIYI

>A0A158PLA6\_ANGCS/132-323  
IPKHVQNCHEKHESGLIVLTDGDDYVYDFYHESHPHVEEQLVAAIYDLSKYKVDLVEIYFVSKSPCFHQDCEPQCDVLDACAELAIQVYRQAKTDLKMSVKFLASYGDLYKQGITMMMNAGIDVEPLGMRDWIELVHNDSTYYSWKGLLTSYIRQSEIYI

>U6NTW9\_HAECO/157-347  
VPKHVQNCHEKHESGLIVLTDGDDYVYDFYHESHPHVEEQLVAAIYDLSKYKVDLVEIYFVSKSPCFHQDCEPQCDVLDACAELAIQVYRQAKTDLKMSVKFLASYGDLYKQGITMMMNAGIDVEPLGMRDWIELVHNDSTYYSWKGLLTSYIRQSEIYI

>A0A158R0Z7\_NIPBR/52-302  
FVVPKHVQNCHEKHESGLIVLTDGDDYVYDFYHESHPHVEEQLVAAIYDLSKYKVDLVEIYFVSKSPCFHQDCEPQCDVLDACAELAIQVYRQAKTDLKMSVKFLASYGDLYKQGITMMMNAGIDVEPLGMRDWIELVHNDSTYYSWKGLLTSYIRQSEIYI

>A0A0C2D4B7\_9BILA/130-292  
VPKHVQNCHEKHESGLIVLTDGDDYVYDFYHESHPHVEEQLVAAIYDLSKYKVDLVEIYFVSKSPCFHQDCEPQCDVLDACAELAIQVYRQAKTDLKMSVKFLASYGDLYKQGITMMMNAGIDVEPLGMRDWIELVHNDSTYYSWKGLLTSYIRQSEIYI

>A0A183IMD0\_9BILA/141-363  
FAVTNKTGCGQKNETAAIIVLGGGNIIEFHESLHPEEQFLTALMELSEYQVNLLEEVLVYCSKSPCYHQDCEPQCDVLDACAELAIQVYRQAKTDLKMSVKFLASYGDLYKQGITMMMNAGIDVEPLGMRDWIELVHNDSTYYSWKGLLTSYIRQSEIYI

>A0A0N5DEG0\_TRIMR/83-275  
FLVSRSTQCEKHESGLIVLTDGDDYVYDFYHESHPHVEEQLVAAIYDLSKYKVDLVEIYFVSKSPCFHQDCEPQCDVLDACAELAIQVYRQAKTDLKMSVKFLASYGDLYKQGITMMMNAGIDVEPLGMRDWIELVHNDSTYYSWKGLLTSYIRQSEIYI

>A0A085LQT5\_9BILA/165-355  
ISRTTQHCHEKHESGLIVLTDGDDYVYDFYHESHPHVEEQLVAAIYDLSKYKVDLVEIYFVSKSPCFHQDCEPQCDVLDACAELAIQVYRQAKTDLKMSVKFLASYGDLYKQGITMMMNAGIDVEPLGMRDWIELVHNDSTYYSWKGLLTSYIRQSEIYI

>A0A077ZDL7\_TRITR/175-365  
VSRRTTQHCHEKHESGLIVLTDGDDYVYDFYHESHPHVEEQLVAAIYDLSKYKVDLVEIYFVSKSPCFHQDCEPQCDVLDACAELAIQVYRQAKTDLKMSVKFLASYGDLYKQGITMMMNAGIDVEPLGMRDWIELVHNDSTYYSWKGLLTSYIRQSEIYI

>E5SVP6\_TRISP/124-300  
SRGQQCEQKHESEVILVLTGDDYVYDFYHESHPHVEEQLVAAIYDLSKYKVDLVEIYFVSKSPCFHQDCEPQCDVLDACAELAIQVYRQAKTDLKMSVKFLASYGDLYKQGITMMMNAGIDVEPLGMRDWIELVHNDSTYYSWKGLLTSYIRQSEIYI

>A0A0V1MU51\_9BILA/171-360  
SRGQQCEQKHESEVILVLTGDDYVYDFYHESHPHVEEQLVAAIYDLSKYKVDLVEIYFVSKSPCFHQDCEPQCDVLDACAELAIQVYRQAKTDLKMSVKFLASYGDLYKQGITMMMNAGIDVEPLGMRDWIELVHNDSTYYSWKGLLTSYIRQSEIYI

>A0A067QK96\_ZOONE/50-213  
WTAFYINGRPKLKCITLCHVVFNETATAEQWEISYSHGPHAEIKVLRNIKARELCLGQYTRIVTLFSLYSPCANCANFIEFSRTRPQCTVYIRFTCLFRHPEEIHDRGLRRLNAPGISLGVFTVYVWRRLAEAGMPFRPWDSKWK

>H3B7Z9\_LATCH/181-343  
FYGKFNTRKNGRNLCSLEGENKPKWGYAHNSKHAENIVREVASYKPLNFHYSYGPCSNCCDKILDFQKFKIKIMIKISRLYKDESSVFQNSIKKLMQMGVSVQVMNRGDFEQCFKGFVQDGFQVPALEPTSEKCAANLEA

>H3B7Z9\_LATCH/4-168  
FEAEFNNTVNSFRLLCFSLQENKTWNWGYAHNNSHAEILVREIEKYEKADHEIRQRVTLVYTCSPCNRCTKILEFFRQRFQFMDIKISKIYDLSLQDLKQLGVSLKVMDSDFKECDFLVHTAEFEFVPGLEEKTKQLNAVFL

>W5M7A0\_LEPOC/25-192  
FYQFCNTLRTCRLLCFSLQENKTWNWGYAHNNSHAEILVREIEKYEKADHEIRQRVTLVYTCSPCNRCTKILEFFRQRFQFMDIKISKIYDLSLQDLKQLGVSLKVMDSDFKECDFLVHTAEFEFVPGLEEKTKQLNAVFL

>G1K46\_ANOCA/8-175  
FEENFNNTLVKRLTLFSLQENKTWNWGYAHNNSHAEILVREIEKYEKADHEIRQRVTLVYTCSPCNRCTKILEFFRQRFQFMDIKISKIYDLSLQDLKQLGVSLKVMDSDFKECDFLVHTAEFEFVPGLEEKTKQLNAVFL

>G3V578\_SARHA/14-179  
FYEYFNKTRPHQTLFSLQENKTWNWGYAHNNSHAEILVREIEKYEKADHEIRQRVTLVYTCSPCNRCTKILEFFRQRFQFMDIKISKIYDLSLQDLKQLGVSLKVMDSDFKECDFLVHTAEFEFVPGLEEKTKQLNAVFL

>K7E403\_MONDO/13-175  
FHRNFSTKASHQTLFSLQENKTWNWGYAHNNSHAEILVREIEKYEKADHEIRQRVTLVYTCSPCNRCTKILEFFRQRFQFMDIKISKIYDLSLQDLKQLGVSLKVMDSDFKECDFLVHTAEFEFVPGLEEKTKQLNAVFL

>A0A091G380\_9AVES/2-125  
LFEAGGYLDAVTCENIRCIILYSSYSPCNEVPHCCVSKIYNFLSKYPEITLCIYFSQLYHTQCPASAREALRSLWSPRVTLQRRPQGPGLWPSFVCGGSLSHPLRTS

>A0A091WIF8\_OPIHO/3-124  
FEVGGYLDVAVYKNIIRCIILYANYSPCNEAYHCCISKIYNFLSKYPEITLCIYFSQLYHTQCPASAREALRSLWSPRVTLQRRPQGPGLWPSFVCGGSLSHPLRTS

>A0A099ZXL0\_CHAVO/4-126  
EVGGYLDVAVYENIRCIILYANYSPCNEAYHCCVSKIYNFLSKYPEITLCIYFSQLYHTQCPASAREALRSLWSPRVTLQRRPQGPGLWPSFVCGGSLSHPLRTS



>A0A091KL2\_9GRUI/4-128  
EVGGYLDVAVAYENIRWILYSNYSNPCNEAHHCVCISKIYNFLKYPEIRLCIYFSQLYHTEFPTAREALRSLSSPRVLQRLPGGMWHYFVYGGSLYHLRSLTQQ

>A0A093ITV6\_FULGA/4-127  
EVGGYLDVAVAYENIRWILYSNYSNPCNEAHHCVCISKIYNFLKYPEITLCIYFSQLYHTEFPTAREALRSLSSPRVLQRLPGGARRYFVYGGALYHPSRTL

>A0A087QVF4\_APTFO/2-125  
LFEMGGYLDVAVAYENIRWILYSNYSNPCNEAHHCVCISKIYNFLKYPEITLCIYFSQLYHTEFPTAREALRSLSSPRVLQRLPAGAQRVYFVYGGSLYHPSRTL

>A0A091LC91\_CATAU/4-127  
EVGGYLDVAVAYENIRWILYSNYSNPCNEAHHCVCISKIYNFLKYPEITLCIYFSQLYHTEFPTAREALRSLSSPRVLQRLPGGAWRYFVYGGSLYHPSRTL

>A0A091UX9\_PHALP/7-125  
GYLDAVACENIGCIIYSNYSNPCNEAHHCVCISKIYNFLKYPEIALCIYFSQLYHTEFPTAREALRSLSSPRVLQRLPGGTWRVYFVYGGSLYHPPRTL

>E1BTD6\_CHICK/49-244  
RAFQFPQCRAPQTHLLFYELKFSFGTVQKGHATSEDNHPESMLFEADGYLDAVAYRNICITLISNYSNPCNEAHHCVCISKIYNFLKYPEITLCIYFSQPYHTEFPTARQALHSLASPVTLQPLPTGTWCHVYGGSLQHPPTLRQNPQHINNFRG

>G3UV61\_MELGA/48-245  
LRAFQFPQRAAQTHLLFYELRSFGTVQKGHASSEDSPESMLFEADGYLDAVAYRNICITLISNYSNPCNEAHHCVCISKIYNFLKHPETLCLYFSQPYHIEFPTARQALRSLASPVTLQPLPMGTGRCHFVYGGSLQHPPTVGVQNPQHINNFRG

>A0A093DVS1\_9AVES/2-85  
LFEVGSYLDVAHAVENMGCIILYSNYSNPCNEAHHCVCISKIYNFLKYPEITLCIYFSQLYHTQFCATRKALQSFSSN

>A0A091O6M3\_LEPDC/5-125  
VGGYLDVAVAYENIGCIIYSNYSNPCNEAHHCVCISKIYNFLKYPEIIRIYFSQLYHTEFPTACRALWLSLSSPRVLQRLPGGAWHYFVHGGSFYHPSRTL

>A0A093HKT8\_STRCA/2-124  
LFEAGGYLDSVYTESIGHIILYSNYSNPCNEADHCCISKIYNFLKHPETLCLYFSQLYHTEFPTAREALRSLSSPHVTLPLSGGIRHYFVYGRSLYHPSRTL

>A0A099Z1L5\_TINGU/2-122  
LFEAGGYLDAVYEDIGIILYSNYSNPCNEADHCCISKIYSFLTKYQVTLCIYFSKLYHIELPTAHEVLKSLSSPHVTLHPLCGGWIHYFVHGGSLYHPSR

>H9GLZ8\_ANOCA/51-241  
FHQAFGFPYTHQNKHLIFYELRHSFGTKMGKHATNEDIHPESMLFETGGYLDINWENVMYIILYSNYSNPCNEAECCISKIYNFLKMPYGITLCIYFSQLYHTELPISCEALQSLASPVTLNPLCGGLWHSFVTSQACYHPIRALRQNAQINNITG

>M7B925\_CHEMY/46-257  
FHKAQFPYMPQNKHLIFYELRSFGTVQKGHATNKNIHPESMLFEMGGYLDALDYDSIRYIILYSNYSNPCNEAECCISKIYNFLKYPITLCIYFSQLYHMEFPVSCALRSLASPHVTLNPLCGGWHFVSGEALYHPARALQNSYKINNITG

>H3B3J0\_LATCH/47-227  
FYEAFGFPYTPRNKHLIFYELRNSIGTLQKGOATNLNLHPSTFLDGLDYDSIYDNISYITLISNYSNPCNEAHHCVCISKIYNFLKYPITLCIYFSQLYHTEFPESREALRSLASPVTLNPLCGGWHFVSGEALYHPARALQNSYKINNITG

>F6ZR34\_XENTR/47-234  
FYEAFGFPYTPENKQILFYELKFSFGTVQKGHATNEDIHPESMLFEDSGYLDALHGGVGYITLYANTPCNEYGHYKISKIYNFLKYPITLCIYFSQLYHTEFPESREALRSLASPVTLNPLCGGWHFVSGEALYHPARALQNSYKINNITG

>F6VU78\_ORNAN/48-231  
FYQTFGFPYMPQPEHLIFYELKFSGAPVQKGOATNSQIHPESMLFEEGGYLDVYDSDIGHILYSNYSNPCNEAECCISKIYNFLKMPYGITLCIYFSQLYHTEFPASRKALRSLASPVTLNPLCGGWHFVSGEALYHPARALQNSYKINNITG

>G3WLB3\_SARHA/47-227  
FYQIFGFPYTPQTKHLIFYELKTSGLVQKGHASGDTHPESMLFEMDYSLEAVNNDNIEHVLISNYSNPCNEAHHCVCISKIYNFLKMPYGITLCIYFSQLYHTEFPASRKALRSLASPVTLNPLCGGWHFVSGEALYHPARALQNSYKINNITG

>H0VBH8\_CAVPO/47-214  
FHQIFGFPYTPQTKHLIFYELKTSGLVQKGHASGDTHPESMLFEMNGYLDASANNIRHILYSNYSNPCNEAHHCVCISKIYNFLKMPYGITLCIYFSQLYHTEFPASRKALRSLASPVTLNPLCGGWHFVSGEALYHPARALQNSYKINNITG

>G5B444\_HETGA/47-231  
FHQVFGFPYTPQTKHLIFYELKTSGLVQKGHASGDTHPESMLFEMNGYLDASANNIRHILYSNYSNPCNEAHHCVCISKIYNFLKMPYGITLCIYFSQLYHTEFPASRKALRSLASPVTLNPLCGGWHFVSGEALYHPARALQNSYKINNITG

>ABEC4\_MOUSE/47-263  
FHQTFGFPYTPQTKHLIFYELKTSGLVQKGHASGDTHPESMLFEMNGYLDASANNIRHILYSNYSNPCNEAHHCVCISKIYNFLKMPYGITLCIYFSQLYHTEFPASRKALRSLASPVTLNPLCGGWHFVSGEALYHPARALQNSYKINNITG

>ABEC4\_RAT/47-256  
FHQTFGFPYTPQTKHLIFYELKTSGLVQKGHASGDTHPESMLFERDGYLDSLHDSNIRHILYSNYSNPCNEAHHCVCISKIYNFLKMPYGITLCIYFSQLYHTEFPASRKALRSLASPVTLNPLCGGWHFVSGEALYHPARALQNSYKINNITG

>F7D911\_HORSE/47-232  
FYQIFGFPYTPQTKHLIFYELKTSGLVQKGHASGDTHPESMLFEMNGYLDASANNIRHILYSNYSNPCNEAHHCVCISKIYNFLKMPYGITLCIYFSQLYHTEFPASRKALRSLASPVTLNPLCGGWHFVSGEALYHPARALQNSYKINNITG

>G1NXW1\_MYOLU/47-231  
FYQIFGFPYTPQTKHLIFYELKTSGLVQKGHASGDTHPESMLFEMNGYLDASANNIRHILYSNYSNPCNEAHHCVCISKIYNFLKMPYGITLCIYFSQLYHTEFPASRKALRSLASPVTLNPLCGGWHFVSGEALYHPARALQNSYKINNITG

>F1S657\_PIG/47-239  
FYQLFGFPYTPQTKHLIFYELKTSGLVQKGHASGDTHPESMLFERNGYLDASANNIRHILYSNYSNPCNEAHHCVCISKIYNFLKMPYGITLCIYFSQLYHTEFPASRKALRSLASPVTLNPLCGGWHFVSGEALYHPARALQNSYKINNITG

>S9WFU5\_CAMFR/54-199  
FYQLFGFPYTPQTKHLIFYELKTSGLVQKGHASGDTHPESMLFERNGYLDASANNIRHILYSNYSNPCNEAHHCVCISKIYNFLKMPYGITLCIYFSQLYHTEFPASRKALRSLASPVTLNPLCGGWHFVSGEALYHPARALQNSYKINNITG

>H0WM53\_OTOGA/47-232  
FYQIFGFPYTPQTKHLIFYELKTSGLVQKGHASGDTHPESMLFERNGYLDASANNIRHILYSNYSNPCNEAHHCVCISKIYNFLKMPYGITLCIYFSQLYHTEFPASRKALRSLASPVTLNPLCGGWHFVSGEALYHPARALQNSYKINNITG

>G3MWJ4\_BOVIN/47-233  
FYQIFGFPYTPQTKHLIFYELKTSGLVQKGHASGDTHPESMLFERNGYLDASANNIRHILYSNYSNPCNEAHHCVCISKIYNFLKMPYGITLCIYFSQLYHTEFPASRKALRSLASPVTLNPLCGGWHFVSGEALYHPARALQNSYKINNITG

>W5P5G7\_SHEEP/47-235  
FYQIFGFPYTPQTKHLIFYELKTSGLVQKGHASGDTHPESMLFERNGYLDASANNIRHILYSNYSNPCNEAHHCVCISKIYNFLKMPYGITLCIYFSQLYHTEFPASRKALRSLASPVTLNPLCGGWHFVSGEALYHPARALQNSYKINNITG

>G1L6U8\_AILME/47-234  
FYQIFGFPYTPQTKHLIFYELKTSGLVQKGHASGDTHPESMLFERNGYLDASANNIRHILYSNYSNPCNEAHHCVCISKIYNFLKMPYGITLCIYFSQLYHTEFPASRKALRSLASPVTLNPLCGGWHFVSGEALYHPARALQNSYKINNITG

>M3YK05\_MUSPF/47-239  
FHQIFGFPYTPQTKHLIFYELKTSGLVQKGHASGDTHPESMLFERNGYLDASANNIRHILYSNYSNPCNEAHHCVCISKIYNFLKMPYGITLCIYFSQLYHTEFPASRKALRSLASPVTLNPLCGGWHFVSGEALYHPARALQNSYKINNITG

>M3WE63\_FELCA/47-233  
FYQIFGFPYTPQTKHLIFYELKTSGLVQKGHASGDTHPESMLFERNGYLDASANNIRHILYSNYSNPCNEAHHCVCISKIYNFLKMPYGITLCIYFSQLYHTEFPASRKALRSLASPVTLNPLCGGWHFVSGEALYHPARALQNSYKINNITG

>E2RD46\_CANLF/47-236  
FYQIFGFPYTPQTKHLIFYELKTSGLVQKGHASGDTHPESMLFERNGYLDASANNIRHILYSNYSNPCNEAHHCVCISKIYNFLKMPYGITLCIYFSQLYHTEFPASRKALRSLASPVTLNPLCGGWHFVSGEALYHPARALQNSYKINNITG

>L9L463\_TUPCH/47-264  
FYQIFGFPYTPQTKHLIFYELKTSGLVQKGHASGDTHPESMLFERNGYLDASANNIRHILYSNYSNPCNEAHHCVCISKIYNFLKMPYGITLCIYFSQLYHTEFPASRKALRSLASPVTLNPLCGGWHFVSGEALYHPARALQNSYKINNITG

>A0A09SA64\_CHLSB/47-231  
FCQIFGFPYTPQTKHLIFYELKTSGLVQKGHASGDTHPESMLFERNGYLDASANNIRHILYSNYSNPCNEAHHCVCISKIYNFLKMPYGITLCIYFSQLYHTEFPASRKALRSLASPVTLNPLCGGWHFVSGEALYHPARALQNSYKINNITG

>F7GWZ1\_CALJA/47-228  
FCQIFGFPYTPQTKHLIFYELKTSGLVQKGHASGDTHPESMLFERNGYLDASANNIRHILYSNYSNPCNEAHHCVCISKIYNFLKMPYGITLCIYFSQLYHTEFPASRKALRSLASPVTLNPLCGGWHFVSGEALYHPARALQNSYKINNITG

>H2N4F1\_PONAB/47-228  
FCQIFGFPYTPQTKHLIFYELKTSGLVQKGHASGDTHPESMLFERNGYLDASANNIRHILYSNYSNPCNEAHHCVCISKIYNFLKMPYGITLCIYFSQLYHTEFPASRKALRSLASPVTLNPLCGGWHFVSGEALYHPARALQNSYKINNITG

>G3R253\_GORGO/47-228  
FCQIFGFPYTPQTKHLIFYELKTSGLVQKGHASGDTHPESMLFERNGYLDASANNIRHILYSNYSNPCNEAHHCVCISKIYNFLKMPYGITLCIYFSQLYHTEFPASRKALRSLASPVTLNPLCGGWHFVSGEALYHPARALQNSYKINNITG

>K7G199\_PELSI/28-181

DPSVLRVRQYLLYEVKWSNSRKLTCQCHSTRTEHAEIYFLEDVFRQRYDPSDHCSLTWYMSWSPGCECKAIRDFLKEQPNVNLVIYVARIYCHEEENRQGLRSLVNVITIRMDLPVSYCWRTFVCEDEKDEDYVPRHFAPWIMLYS

>K7G211\_PELSI/1-118  
HAEIYFLKDFVNRQRNDPSDHCSLTWYMTWSPGCECKAIRDFLKEQPNVNLVIYVARIYCHEEENRQGLRSLVNVITIRMDLPVSYCWRTFVCEDEDFPGSEPGSHHKSMLLT

>A0A093I8Y9\_STRCA/1-74  
ITWYLSWSPCRNCCYEMQYFLKHPNVNICIYLARLYTTEDEEICKALKDLSEKVIISVMKIEDIYCWKTFV

>A0A091MHU6\_9PASS/1-63  
ITWYLSWSPCVNCCYKIRDFLNRHSYVIRIYVARLCYRGFHRNRKGLRNLVSLRVTVNME

>A0A093S6Z3\_9PASS/1-65  
ITWYLSWSPCVNCCNEILDFLERHENVNIDIHVARLYFKDSKRTHRALKELARSTVSINVNMME

>R4GDA3\_ANOCA/18-173  
QRNFDPREFPECTLLLYEIHWDNNTSRNWCTNKGLHAEENFLQIFNEKIDIRQDTPCSITWFLSWSPCYPCSQAIFLEAHPNVLSLEIKARLYMHQIDCNKEGLRNLGRNRSIMNLPDYRHCWTTFFVPRNEDYWPQDFLATNYSREL

>A0A091ETZ4\_CORBR/1-64  
ITWYLSWSPCMTCYIIRNFLVRHPNVNIEIHVARLYNTRWAGTRRGLRELARLVRTIDVME

>U3JXR8\_FICAL/12-171  
FDPRTYPSSETYLLCELQWGGSGRFFWIHWARNDEDSHVEHYFLEQIFEPRESYVCDITWYLSWSPCANCCDIOEFLEEQHNVLDIRVARVYNEHIRENRAALRQLANFQAIRAMDVEDYMYCWDTFLOQGGYDFDTAGSFRSAVERTRLRLE

>H0ZSB5\_TAEGU/1-76  
DMTWYLSWSPGCECCDIQDFLEEQPNVNIIRVARLYYTRASNKGLRELASSPVTLEIMDAEDYNYCWETFI

>A0A091R868\_9GRUI/1-65  
ITWYLSWSPCANCCYEIVDFLQRHSYVNIKIFVARLYDRERNRQGLRDLMSAVTIDVMDIE

>A0A091QH63\_MERNU/1-65  
ITWYLSWSPCANCCYRIVQFLMKHSYVIDIRVARLYFIEDETTRQGLEELVSCAVRLTVMDE

>A0A091KM1\_CALAN/1-70  
ITWYLSWSPCACCCCKIQDFLKMNSYVNTDIDVAQLYGNQEQCNQGLKNLKS LAVTIAVMRIEDIKSC

>A0A094K7N8\_ANTCR/1-65  
ITWYLSWSPCANCCRKIRNFKKHSYVYDIYVARLYIDDEENRRGLRNLQSLDVTIAVMEIE

>A0A091GQ55\_BUCRH/1-65  
ITWYLSWSPCADCCCKIVNFKKHSYVNMRIYVARLYPEYETNRRLGNLRLNLAIVIAVMEIE

>A0A151P7C9\_ALLMI/18-177  
FEKNYKIDGTKEAHLLECEIKWGWYKGPWLHWCQNRNIHAEDYFMNFIKAKKHPVHCYVWYLSWSPCADCASKIVKFLERPYLKLTIVYLAQLYHTEENRGLRLLRSKKVIIRVMDISDYNWCWVFSVSNQNGEDYWPQDFPWVWKENYSRL

>A0A093CT04\_TAUER/1-65  
ITWYLSWSPCARCCYKILDFLKEHSYVNLHIYVARLYCIEDEKTRRGLKLNLEVTIAVMEIE

>A0A091V1W3\_PHORB/1-65  
ITWYLSWSPCAKCCYEILNFKKHPNVNIDYVARLYDIEKEKTRQGLKLNLRVLTIAVMEIE

>A0A091V9F4\_NIPNI/1-65  
ITWYLSRSPCAKCCYEILDFLNKHSNVNIDYIYQYKIKNEENCQGLRNLVSLAVTIAVMEIE

>A0A151P6H5\_ALLMI/36-174  
SELTWGRGRPKHWYENTEHECHAEIHFLENFSSKNGSCITWYLSWSPCAECASARIADFMKENTNKIINHVARLYLHDDKTRQGLRYLMKMKVTIQIMTIPDYKYCWNTFLEDDGEDESDDYGGYAGVHEDEDES

>A0A099ZZR5\_CHAVO/1-65  
ITWYLSWSPCAECCCKILNLEENSNVNIDIHARIYQIDERNRQGLRELVSSEVTIAVMGIE

>A0A093J6I5\_FULGA/1-65  
ITWYLSWSPCAKCCRKILNFKKHSNVKIDYVARLYYIEDEKNRQGLKLNLSLAVKIAVMEIE

>A0A091PTE0\_LEPDC/1-75  
VTWYLSWSPCVNCCRKILNFKKHSNVNIDMHVARLYYIEDERIRQGLKLNLSLAVTIAVMEIEDYTYCWKNFI

>A0A093JP51\_EURHL/1-65  
ITWYLSWSPCAHCCRKILNFKKHSNVNIDYIYARLYYIENEEIRQGLKLNLSLEVKIAVMEIE

>A0A091RWG2\_NESNO/1-65  
ITWYLSWSPCVNCCRKILNFKKHSYVNIKIYVARLYYIDDEIRQGLKLNLSLAVTIAVMDIE

>A0A0Q3WRD0\_AMAAE/72-248  
LKYHFDPREVXRDTYLLCILRWGETGTPWWSHWKNRYHAEVYFLEKIFQTRKSSKNINCSITWYLSWSPCAKCCRKILNFKKHSYVSIKIHVARLFRIDDKETXQNLKGLSVTVSVMEXYDNCWKTFRIGHADGSDWIDDLKSEIRKRLKFO

>A0A091PR75\_HALAL/1-65  
ITWYLSWSPCADCCHKILNFKKHSNVNIDIHVARLYYAEDEKVRQGLKLNLSLAVTIAVMETK

>A0A087QNJ4\_APTFO/1-65  
ITWYLSWSPCADCCRKILNFKKHSNVNIDYVARLYYIEDEKIRQGLQNLVSLAVTIAVMEIE

>A0A087VRL2\_BALRE/1-66  
ITWYLSWSPCADCCHKILNFKKHSNVNIDYVARLYYIEDEIRQGLKLNLSLAVTIAVMKIE

>A0A093F6R6\_GAVST/1-69  
ITWYLSWSPCANCCRKILRFLKHSNVNIDIHVARLYYIEDENIRQGLKLNLSLAVTIAVMEIEGKVF

>A0A091TH63\_PHALP/1-65  
ITWYLSWSPCADCCHKILNFKKHSNVNIIYVARLYYKEDEKIRQGLKLNLSLAVTIAVMEIE

>A0A093QYH8\_PHACA/1-65  
ITWYLSWSPCECCCKILNFKKHSNVNIDYVARLYYIEDEKIRQGLKLNLSLAVTIAVMGIE

>Clipboard\_Contents  
FEVFFDPRELKRETCLLYEINWGRHSIWRHTSQNTNKHVEVNFIEKFTTERYFCPNTRCSITWFLSWSPGCECSRAITEFLSRYPHVTLFIYARLYHADPRNRQGLRDLISSGVTIQIMTEQESGYCWRNFVNYSPNEAHWPYPHLLVWRL

>L5KGJ8\_PTEAL/30-187  
FEVFFDPRELKREACLLYEIQWGTSHKIWRNSGKNTTKHVELNFIEKFTSERHFCSVSCSIWFLSWSPCEWCSKAIREFLSQRPTVTLVIFVSRFQHMDDQNQRGLRDLINSVGTIQIMRASEYDHCWRNFVNYPPGKEAHWPYPHLLVWRLKLYA

>L5LUG3\_MYODS/37-228  
IFDRELKREACLLYEIKWGTGKHWRSNGKNTTRHVEVNFIEKFTSERQFCSSSTSCSIWFLSWSPCEWCSKAIREFLRQRPVTLVYVARLYYHMDQNRQGLRDLVSGVTVQIMTPEYDYCWRNFVNYPPGKETHCPYPLLMKLYALEHL

>F6WR88\_HORSE/9-168  
FEAFFDPRELKREACLLYEIKWGMSHNIWRYSKNTTKHVEVNFIEKFTSERHLRPSISCSIVWFLSWSPCEWCSKAIREFLSQHPNVTLVYVARLFQHMMDLRNQRGLRDLINSVGTIQIMRTSEYDHCWRNFVNYPPGKEAHWPYPHLLVWRLKLYA

>F1SLW4\_PIG/25-176  
VFFDPRELKRETCLLYELQWGRSDTWRHTGKNTTKHVERNFLAKITSERHFSPVHCSIVWFLSWSPCEWCSKAIREFLDQHPVTLVYVARLFQHMMDPQNQRGLRDLVNHGVTIQIMGAPEYDYCWRNFVNYPPGKEAHWPYPHLLVWRL

>W5NVH9\_SHEEP/27-179  
FDPNRFCKEAYLLEIQWGNRSDVWRHSGKNTTKHVERNFIEKIASERHFRPISCSISWYLSWSPCEWCSKAIREFLNQHPNVTLVYVARLFQHMMDPQNQRGLKDLFHSVGTIQIMRDEYDYCWRNFVNYPPGKEAHWPYPHLLVWRLKLYA

>M3WB96\_FELCA/23-178  
FEVFFDPRELKREACLLYEIKWGTSHRIWRNSGRNTANHVELNFIEKFTSERHFCSVSCSIWFLSWSPCEWCSKAIREFLSQHPVTLVYVSRFLWHLDDQNQRGLRDLVNSVGTIQIMRPEYDHCWRNFVNYPPGEEHWPYPHLLVWRLKLYA

>F1PUJ5\_CANLF/23-183  
FEFFFDPRELRKETCLLYEIQWGTSHKTWRNSGKNTNHVEVNFIEKFTAERHFCPSISCSITWFLSWSPWCWECNSAIRGLFSQHPVTLVIYVARLFWHTDQPNRQGLRDLNSGVTIQIMTVPEYDHCWRNFVNYPPGKEDHWPRVPLWMLYALELH

>I3N301\_ICTTR/12-175  
FEVFFNPGVLRKETCLLYEIQWGTSRKIWRNSKNTNHVEVNFIEKFTAERHFCPSISCSITWFLSWSPWCWECNSAIRGLFSQHPVTLVIYVARLFWHTDQPNRQGLRDLNSGVTIQIMTVSDSLTCWLHFLSHRVYVILMKKCGNLV

>G1TVM9\_RABIT/50-205  
FEVFFDPRQLRKEACLLYEIKWGASSKTWRSSGKNTNHVEVNFLEKLTSEGRLPSTCCSITWFLSWSPWCWECNSAIRGLFSQHPVTLVIYVARLFWHTDQPNRQGLRDLNSGVTIQIMTVSEYCYWENFVNYPPGKAAQWPRPFRPRR

>H0VV31\_CAVPO/20-179  
FEASFDPRQLRKEACLLSEVRWGSPTWRRESGLNTTSHVEVNFIEKFTSGRSLRPAIRCSITWFLSWSPWCWECNSAIRGLFSQHPVTLVIYVARLFWHTDQPNRQGLRDLNSGVTIQIMTVSEYCHWCRNFVNYPPGQEAQWPRFPPMWTTLYA

>H0W6W5\_CAVPO/16-179  
FEAYFDPRQLRKEACMLSEVRWGSPTWRRESGLNTTSHVEVNFIEKFTSGRSLRPAIRCSMTWFLSWSPWCWECNSAIRGLFSQHPVTLVIYVARLFWHTDQPNRQGLRDLNSGVTIQIMTVSEYCHWCRNFVNYPPGQEAQWPRFPPMWTTLYA

>F7F6M6\_CALJA/24-178  
YISYDPKELCKETCLLYEIKWGMSSKIWRSSGKNTNHVEVNFIEKFTSERHFHLSVCSITWFLSWSPWCWECNSAIRGLFSQHPVTLVIYVARLFWHTDQPNRQGLRDLNSGVTIQIMTVSEYCHWCRNFVNYPPGEEAHWPRHPPLWMLY

>A0A096MWB4\_PAPAN/24-177  
DIFYDPRLELRKEACLLYEIKWGMSPKIWRSSGKNTNHVEVNFIEKFTSERHFHLSVCSITWFLSWSPWCWECNSAIRGLFSQHPVTLVIYVARLFWHTDQPNRQGLRDLNSGVTIQIMTVSEYCHWCRNFVNYPPGEEAHWPRHPPLWMLY

>G1QZV0\_NOMLE/24-177  
DVYFDPRLELRKEACLLYEIKWGMSSKIWRSSGKNTNHVEVNFIEKFTSEGRFQSSISCSITWFLSWSPWCWECNSAIRGLFSQHPVTLVIYVARLFWHTDQPNRQGLRDLNSGVTIQIMTVSEYCHWCRNFVNYPPGEEAHWPRHPPLWMLY

>H2Q5C6\_PANTR/23-177  
FDVYFDPRLELRKEACLLYEIKWGMSSKIWRSSGKNTNHVEVNFIEKFTSERHFHLSVCSITWFLSWSPWCWECNSAIRGLFSQHPVTLVIYVARLFWHTDQPNRQGLRDLNSGVTIQIMTVSEYCHWCRNFVNYPPGEEAHWPRHPPLWMLY

>K7G211\_PELSI/189-300  
ERSLNPLTCSVTWFLSWSPWCWCSQSVVEFRKAYPKVNLVIYVARLFRHEEENRQGLRDLVNMNGVTIRVMNLSAYNYCWRTFVSHQDDYWPWHLT

>A0A151P6M4\_ALLMI/21-173  
FQENYMPSTWPKVTHLLYEIRWKGSKVWRNWCNSLNTQHAEVNCLNENAFKGLQFNPPVCHITWFLSWSPWCWECNSAIRGLFSQHPVTLVIYVARLFWHTDQPNRQGLRDLNSGVTIQIMTVSEYCHWCRNFVNYPPGEEAHWPRHPPLWMLY

>A0A091EQ78\_CORBR/9-142  
FQINYSPSQHRRGVYLLYEIRWRRGSIWRNWCNSNTHRQHAEVNCLNENAFKGLQFNPPVCHITWFLSWSPWCWECNSAIRGLFSQHPVTLVIYVARLFWHTDQPNRQGLRDLNSGVTIQIMTVSEYCHWCRNFVNYPPGEEAHWPRHPPLWMLY

>U3JXR8\_FICAL/251-385  
FQRNYSFSPQNGRNVYLLYEIRWKGSIWRNWCNSNPEQHAENFLNENRNDPOTSCSITWFLSTPCGKCSRRILEFLRHPNVTLKIYAKLFRHHDIRNREGCLNLMGHTIHMNLEDYSYCWRFVAY

>H0ZSB3\_TAEGU/8-142  
FQRNYSFPROHGRVYLLYEIRWRRGSIWRNWCNSNTHRQHAEVNCLNENAFKGLQFNPPVCHITWFLSWSPWCWECNSAIRGLFSQHPVTLVIYVARLFWHTDQPNRQGLRDLNSGVTIQIMTVSEYCHWCRNFVNYPPGEEAHWPRHPPLWMLY

>A0A093PWR2\_9PASS/7-142  
FKRNYLPGQHPQVYLLYEIRWRRGSIWRNWCNSNTHRQHAEVNCLNENAFKGLQFNPPVCHITWFLSWSPWCWECNSAIRGLFSQHPVTLVIYVARLFWHTDQPNRQGLRDLNSGVTIQIMTVSEYCHWCRNFVNYPPGEEAHWPRHPPLWMLY

>A0A091MEP8\_9PASS/7-142  
FQRNYPDQHPQVYLLYEIRWRRGSIWRNWCNSNTHRQHAEVNCLNENAFKGLQFNPPVCHITWFLSWSPWCWECNSAIRGLFSQHPVTLVIYVARLFWHTDQPNRQGLRDLNSGVTIQIMTVSEYCHWCRNFVNYPPGEEAHWPRHPPLWMLY

>A0A091RF60\_9GRUI/11-129  
RNYLPGCYPKVYLLYEIKWRRGTTWRNWCNSNTHRQHAEVNCLNENAFKGLQFNPPVCHITWFLSWSPWCWECNSAIRGLFSQHPVTLVIYVARLFWHTDQPNRQGLRDLNSGVTIQIMTVSEYCHWCRNFVNYPPGEEAHWPRHPPLWMLY

>A0A091IIG0\_CALAN/8-142  
FKRNYPQGRRRNVYLLYEIRWRRGSIWRNWCNSNTHRQHAEVNCLNENAFKGLQFNPPVCHITWFLSWSPWCWECNSAIRGLFSQHPVTLVIYVARLFWHTDQPNRQGLRDLNSGVTIQIMTVSEYCHWCRNFVNYPPGEEAHWPRHPPLWMLY

>A0A091QEK6\_MERNU/8-142  
FKTNYSPDHRPRVYLLYEIRWRRGSIWRNWCNSNTHRQHAEVNCLNENAFKGLQFNPPVCHITWFLSWSPWCWECNSAIRGLFSQHPVTLVIYVARLFWHTDQPNRQGLRDLNSGVTIQIMTVSEYCHWCRNFVNYPPGEEAHWPRHPPLWMLY

>A0A093GVH6\_PICPB/10-142  
KLNYPVGRPRVYLLYEIRWRRGSIWRNWCNSNTHRQHAEVNCLNENAFKGLQFNPPVCHITWFLSWSPWCWECNSAIRGLFSQHPVTLVIYVARLFWHTDQPNRQGLRDLNSGVTIQIMTVSEYCHWCRNFVNYPPGEEAHWPRHPPLWMLY

>A0A091PSV3\_HALAL/7-142  
FKRNYLPGQHPKVVYLLYEIRWRRGSIWRNWCNSNTHRQHAEVNCLNENAFKGLQFNPPVCHITWFLSWSPWCWECNSAIRGLFSQHPVTLVIYVARLFWHTDQPNRQGLRDLNSGVTIQIMTVSEYCHWCRNFVNYPPGEEAHWPRHPPLWMLY

>A0A091M4D7\_CARIC/8-142  
FKRNYLPGQHPVYLLYEIKWNSGTWRNWCNSNTHRQHAEVNCLNENAFKGLQFNPPVCHITWFLSWSPWCWECNSAIRGLFSQHPVTLVIYVARLFWHTDQPNRQGLRDLNSGVTIQIMTVSEYCHWCRNFVNYPPGEEAHWPRHPPLWMLY

>A0A099ZZX4\_CHAVO/10-142  
IRNYLPGKHPNVYLLYEIRWRRGSIWRNWCNSNTHRQHAEVNCLNENAFKGLQFNPPVCHITWFLSWSPWCWECNSAIRGLFSQHPVTLVIYVARLFWHTDQPNRQGLRDLNSGVTIQIMTVSEYCHWCRNFVNYPPGEEAHWPRHPPLWMLY

>A0A094MFH1\_ANTCR/11-142  
RNYLPGYQPNVYLLYEIRWRRGSIWRNWCNSNTHRQHAEVNCLNENAFKGLQFNPPVCHITWFLSWSPWCWECNSAIRGLFSQHPVTLVIYVARLFWHTDQPNRQGLRDLNSGVTIQIMTVSEYCHWCRNFVNYPPGEEAHWPRHPPLWMLY

>A0A093FY71\_TYTAL/8-142  
FKRNYLPGQHPKVVYLLYEIRWRRGSIWRNWCNSNTHRQHAEVNCLNENAFKGLQFNPPVCHITWFLSWSPWCWECNSAIRGLFSQHPVTLVIYVARLFWHTDQPNRQGLRDLNSGVTIQIMTVSEYCHWCRNFVNYPPGEEAHWPRHPPLWMLY

>A0A091TCM6\_PHALP/7-142  
FKRNYSPGQHPKVVYLLYEIRWRRGSIWRNWCNSNTHRQHAEVNCLNENAFKGLQFNPPVCHITWFLSWSPWCWECNSAIRGLFSQHPVTLVIYVARLFWHTDQPNRQGLRDLNSGVTIQIMTVSEYCHWCRNFVNYPPGEEAHWPRHPPLWMLY

>A0A093CIQ8\_9AVES/5-130  
FKINNLPGQHPRVCLLYAIRWRRGSIWRNWCNSNTHRQHAEVNCLNENAFKGLQFNPPVCHITWFLSWSPWCWECNSAIRGLFSQHPVTLVIYVARLFWHTDQPNRQGLRDLNSGVTIQIMTVSEYCHWCRNFVNYPPGEEAHWPRHPPLWMLY

>A0A093FR4\_GAVST/8-142  
FKRNYLPAQHPKVVYLLYEIRWRRGSIWRNWCNSNTHRQHAEVNCLNENAFKGLQFNPPVCHITWFLSWSPWCWECNSAIRGLFSQHPVTLVIYVARLFWHTDQPNRQGLRDLNSGVTIQIMTVSEYCHWCRNFVNYPPGEEAHWPRHPPLWMLY

>A0A093LP85\_FULGA/9-142  
FKRNYLPSKYPKVVYLLYEIRWRRGSIWRNWCNSNTHRQHAEVNCLNENAFKGLQFNPPVCHITWFLSWSPWCWECNSAIRGLFSQHPVTLVIYVARLFWHTDQPNRQGLRDLNSGVTIQIMTVSEYCHWCRNFVNYPPGEEAHWPRHPPLWMLY

>A0A091SSF0\_9AVES/7-142  
FKRNYLPGQHPKVVYLLYEIRWRRGSIWRNWCNSNTHRQHAEVNCLNENAFKGLQFNPPVCHITWFLSWSPWCWECNSAIRGLFSQHPVTLVIYVARLFWHTDQPNRQGLRDLNSGVTIQIMTVSEYCHWCRNFVNYPPGEEAHWPRHPPLWMLY

>A0A093JI54\_EURHL/9-142  
FKRNYMPSQYKVVYLLYEIRWRRGSIWRNWCNSNTHRQHAEVNCLNENAFKGLQFNPPVCHITWFLSWSPWCWECNSAIRGLFSQHPVTLVIYVARLFWHTDQPNRQGLRDLNSGVTIQIMTVSEYCHWCRNFVNYPPGEEAHWPRHPPLWMLY

>A0A087QNJ5\_APTFO/8-142  
FKRNYLPGQHPKVVYLLYEIRWRRGSIWRNWCNSNTHRQHAEVNCLNENAFKGLQFNPPVCHITWFLSWSPWCWECNSAIRGLFSQHPVTLVIYVARLFWHTDQPNRQGLRDLNSGVTIQIMTVSEYCHWCRNFVNYPPGEEAHWPRHPPLWMLY

>A0A093RC01\_PHACA/9-142  
FKRNYSPCQHPKVVYLLYEIRWRRGSIWRNWCNSNTHRQHAEVNCLNENAFKGLQFNPPVCHITWFLSWSPWCWECNSAIRGLFSQHPVTLVIYVARLFWHTDQPNRQGLRDLNSGVTIQIMTVSEYCHWCRNFVNYPPGEEAHWPRHPPLWMLY

>A0A091V7F8\_NIPNI/10-142  
RSNYLPCQHPRVYLLYEIRWRRGSIWRNWCNSNTHRQHAEVNCLNENAFKGLQFNPPVCHITWFLSWSPWCWECNSAIRGLFSQHPVTLVIYVARLFWHTDQPNRQGLRDLNSGVTIQIMTVSEYCHWCRNFVNYPPGEEAHWPRHPPLWMLY

>A0A091XJL0\_OPIHO/7-142  
FKRNYLPGQHPKVVYLLYEIRWRRGSIWRNWCNSNTHRQHAEVNCLNENAFKGLQFNPPVCHITWFLSWSPWCWECNSAIRGLFSQHPVTLVIYVARLFWHTDQPNRQGLRDLNSGVTIQIMTVSEYCHWCRNFVNYPPGEEAHWPRHPPLWMLY

>A0A091RU17\_NESNO/8-142  
FKRNYLPGYQHPKVVYLLYEIRWRRGSIWRNWCNSNTHRQHAEVNCLNENAFKGLQFNPPVCHITWFLSWSPWCWECNSAIRGLFSQHPVTLVIYVARLFWHTDQPNRQGLRDLNSGVTIQIMTVSEYCHWCRNFVNYPPGEEAHWPRHPPLWMLY

>A0A0Q3WQU9\_AMAAE/56-187  
FKRNYLPNRHPKVVYLLYEIRWRRGSIWRNWCNSNTHRQHAEVNCLNENAFKGLQFNPPVCHITWFLSWSPWCWECNSAIRGLFSQHPVTLVIYVARLFWHTDQPNRQGLRDLNSGVTIQIMTVSEYCHWCRNFVNYPPGEEAHWPRHPPLWMLY

>A0A094LEL8\_9AVES/8-141  
FKGNYLPGKHPRVYLLYEIRWRRGSIWRNWCNSNTHRQHAEVNCLNENAFKGLQFNPPVCHITWFLSWSPWCWECNSAIRGLFSQHPVTLVIYVARLFWHTDQPNRQGLRDLNSGVTIQIMTVSEYCHWCRNFVNYPPGEEAHWPRHPPLWMLY

>A0A087VMP5\_BALRE/8-142  
FKRNYLPGKHPRVYVLLYEIRWRSRGTWRSWCSNNAQHAIEINFLCTFLARTSVSCSITWVLTSTPCGKCSRRIEFLNAYPNVTLEIYAAKLFRLDNRNRQGLRNLAMKGVRIHIMNLADYSYFVKIFVAY

>A0A091GLR0\_BUCRH/7-142  
FTRNYLPGHPRVYVLLYEIRWRRGTWIRNWCNSNNAQHAIEKLEFNCFNATTSVCSIIWFLSTPCGKCSRTRILEFLRAHPNVTLEIYAAKLFKHHNDRNRRLWNLAMNGVKLHIMNPADYSYCWKMFVAY

>I3M955\_ICTTR/250-417  
FHLQFNHLHRPCKRYTYLCYQLRGLSLCDQDYFNKDLHAEIRFIKIRSLDLQSHNYEVTCTYLTWSPCPDCAQELVALTRSHPHVRLTFTSRLYFHWLWRFQEGRLLRWSGVQIRVMSLREFTHCWVFKVNHGGCPPEFPWDGLEQRSQIQNRLNR

>G3I2J2\_CRIGR/230-389  
NRHRVYRQRKTYLCYLLLEQNGQPLKGLQNKKGKHAIEIFIDEMRSELGQVQITCYLTWSPCPNCAQELAAFKSDHPDLVRIYTSRLYFHWRRKYQEGLCCLWRSQIQVDVMDLPQFADCWTFNFGVSPFPWPNWLNKNSRQIRRLRR

>F7EWS7\_RAT/229-389  
NSHRVYRKRKSYLCYQLERNQGEPLKGYLLYKQGHVEILFLEKMRSMELSQVRITCYLTWSPCPNCAQELAAFKSDHPDLVRIYTSRLYFHWRRKYQEGLCCLWRSQIQVDVMDLPQFADCWTFNFGVSPFPWPNWLNKNSRQIRRLRR

>ABEC3\_RAT/241-405  
FYSQFYNQRVHGKPYLYCYLEQNGQAPLKGCLLSEGOHAIEILDKIRSMELSQVITCYLTWSPCPNCAQELAAFKSDHPDLVRIYTSRLYFHWRRKYQEGLCCLWRSQIQVDVMDLPQFADCWTFNFGVSPFPWPNWLNKNSRQIRRLRR

>A0A091EM42\_FUKDA/548-715  
FRIOFNNAKPHRRVYTYLCYQKNGNLLTKGLRKTGYHAESRFKIKRSLGLDQAQSYQVTCFLTWSPCPNCAQELVLFKSSHPHLYRIFTARLYFHWRRKYQEGLCCLWRSQIQVDVMDLPQFADCWTFNFGVSPFPWPNWLNKNSRQIRRLRR

>G5AYU5\_HETGA/236-403  
FRVQFNNAKPHRRVYTYLCYQLEQNGDPLTKGLRKTGYHAESRFKIKRSMGLDQDQSYQVTCFLTWSPCPNCAQELVLFKSSHPHLYRIFTARLYFHWRRKYQEGLCCLWRSQIQVDVMDLPQFADCWTFNFGVSPFPWPNWLNKNSRQIRRLRR

>TONH8\_CAMFR/587-753  
FNKQFGNQPRYRKYTYLCYQLKNGSILAQGCVRNQRHAEIRFIDKINMNLNPNQSYEICYVTWSPCPTCAELVDLINDQVHLKQIFASRLYFHWRRKYQEGLCCLWRSQIQVDVMDLPQFADCWTFNFGVSPFPWPNWLNKNSRQIRRLRR

>B7T155\_BOVIN/34-200  
FKQQFGNQPRYRKYTYLCYQLKNDLTLDRGCFRNQRHAEIRFIDKINSLDLNPSQSYKICYVTWSPCPNCAQELVLFKSSHPHLYRIFTARLYFHWRRKYQEGLCCLWRSQIQVDVMDLPQFADCWTFNFGVSPFPWPNWLNKNSRQIRRLRR

>F7I99\_CALJA/10-175  
NIQLNTPYKRYTYLCYQMPNGSTPTRYFKNKNRHAIEIFIDEISMGDKTQCYEVTCTYLTWSPCPNCAQELVAFKAQVHLNLRIFASRLYHWHLLSCKKGLQLLWKSQIPVEVMGLPEFTDCWENFVHGPPFPNPEKLELDSRAIKRRLRR

>A0A096NK51\_PAPAN/9-179  
FSLQFNKRRPYPRKALLCYQLTPNGSTPTRYFKNKNRHAIEIRFINKIKSMGLDETQCYQVTCYLTWSPCPNCAQELVAFKAQVHLNLRIFASRLYHWHLLSCKKGLQLLWKSQIPVEVMGLPEFTDCWENFVHGPPFPNPEKLELDSRAIKRRLRR

>A0A092R222\_CHLSB/9-179  
FSLQFNKRRPYPRKALLCYQLTPNGSTPTRYFKNKNRHAIEIRFINKIKSMGLDETQCYQVTCYLTWSPCPNCAQELVAFKAQVHLNLRIFASRLYHWHLLSCKKGLQLLWKSQIPVEVMGLPEFTDCWENFVHGPPFPNPEKLELDSRAIKRRLRR

>F6S145\_MACMU/9-179  
FSLQFNKRRPYPRKALLCYQLTPNGSTPTRYFKNKNRHAIEIRFINKIKSMGLDETQCYQVTCYLTWSPCPNCAQELVAFKAQVHLNLRIFASRLYHWHLLSCKKGLQLLWKSQIPVEVMGLPEFTDCWENFVHGPPFPNPEKLELDSRAIKRRLRR

>G1RYZ5\_NOMLE/9-179  
FRLQFNKRRPYPRKALLCYQLTPNGSTPTRYFKNKNRHAIEIRFINKIKSMGLDETQCYQVTCYLTWSPCPNCAQELVAFKAQVHLNLRIFASRLYHWHLLSCKKGLQLLWKSQIPVEVMGLPEFTDCWENFVHGPPFPNPEKLELDSRAIKRRLRR

>H2P4F3\_PONAB/9-179  
FSLQFNKRRPYPRKALLCYQLTPNGSTPTRYFKNKNRHAIEIRFINKIKSMGLDETQCYQVTCYLTWSPCPNCAQELVAFKAQVHLNLRIFASRLYHWHLLSCKKGLQLLWKSQIPVEVMGLPEFTDCWENFVHGPPFPNPEKLELDSRAIKRRLRR

>H2QLQ0\_PANTR/9-179  
FRLQFNKRRPYPRKALLCYQLTPNGSTPTRYFKNKNRHAIEIRFINKIKSMGLDETQCYQVTCYLTWSPCPNCAQELVAFKAQVHLNLRIFASRLYHWHLLSCKKGLQLLWKSQIPVEVMGLPEFTDCWENFVHGPPFPNPEKLELDSRAIKRRLRR

>M4W6S4\_HUMAN/9-179  
FRLQFNKRRPYPRKALLCYQLTPNGSTPTRYFKNKNRHAIEIRFINKIKSMGLDETQCYQVTCYLTWSPCPNCAQELVAFKAQVHLNLRIFASRLYHWHLLSCKKGLQLLWKSQIPVEVMGLPEFTDCWENFVHGPPFPNPEKLELDSRAIKRRLRR

>F7AL88\_MONDO/6-173  
FLYHFNKVRWAGRHEITYLCYVVKRDSATSLDFGLRNLKNGCHVELLFLRYISDWLDPGRYRVWTFWSPCYDCARHVANFLRCPNLSRIFTARLYFCEDRKEPEGLRRLHRAGVQIAIMTFKDYFCWNTFVENERTFKAWEGHLENSVRLSRQLRR

>G3W3P5\_SARHA/11-178  
FLYHFNKVRWAGRHEITYLCYVVKRDSATSLDFGLRNLKNGCHVELLFLRYISDWLDPGRYRVWTFWSPCYDCARHVANFLRCPNLSRIFTARLYFCEDRKEPEGLRRLHRAGVQIAIMTFKDYFCWNTFVENERTFKAWEGHLENSVRLSRQLRR

>F7A0K1\_HORSE/11-178  
FLYHFNKVRWAGRHEITYLCYVVKRDSATSLDFGLRNLKNGCHVELLFLRYISDWLDPGRYRVWTFWSPCYDCARHVANFLRCPNLSRIFTARLYFCEDRKEPEGLRRLHRAGVQIAIMTFKDYFCWNTFVENERTFKAWEGHLENSVRLSRQLRR

>G3SM91\_LOXAF/9-176  
FLYQFNKVRWAGRHEITYLCYVVKRDSATSLDFGLRNLKNGCHVELLFLRYISDWLDPGRYRVWTFWSPCYDCARHVANFLRCPNLSRIFTARLYFCEDRKEPEGLRRLHRAGVQIAIMTFKDYFCWNTFVENERTFKAWEGHLENSVRLSRQLRR

>L9KY18\_TUPCH/51-185  
MYPLWGRHEITYLCYVVKRDSATSLDFGLRNLKNGCHVELLFLRYISDWLDPGRYRVWTFWSPCYDCARHVANFLRCPNLSRIFTARLYFCEDRKEPEGLRRLHRAGVQIAIMTFKDYFCWNTFVENERTFKAWEGHLENSVRLSRQLRR

>W5N585\_SHEEP/11-181  
FIYQFNKVRWAGRHEITYLCYVVKRDSATSLDFGLRNLKNGCHVELLFLRYISDWLDPGRYRVWTFWSPCYDCARHVANFLRCPNLSRIFTARLYFCEDRKEPEGLRRLHRAGVQIAIMTFKDYFCWNTFVENERTFKAWEGHLENSVRLSRQLRR

>H0W743\_CAVPO/11-178  
FLYQFNKVRWAGRHEITYLCYVVKRDSATSLDFGLRNLKNGCHVELLFLRYISDWLDPGRYRVWTFWSPCYDCARHVANFLRCPNLSRIFTARLYFCEDRKEPEGLRRLHRAGVQIAIMTFKDYFCWNTFVENERTFKAWEGHLENSVRLSRQLRR

>G3QLD2\_GORGO/11-168  
FLYQFNKVRWAGRHEITYLCYVVKRDSATSLDFGLRNLKNGCHVELLFLRYISDWLDPGRYRVWTFWSPCYDCARHVANFLRCPNLSRIFTARLYFCEDRKEPEGLRRLHRAGVQIAIMTFKDYFCWNTFVENERTFKAWEGHLENSVRLSRQLRR

>AICDA\_HUMAN/11-178  
FLYQFNKVRWAGRHEITYLCYVVKRDSATSLDFGLRNLKNGCHVELLFLRYISDWLDPGRYRVWTFWSPCYDCARHVANFLRCPNLSRIFTARLYFCEDRKEPEGLRRLHRAGVQIAIMTFKDYFCWNTFVENERTFKAWEGHLENSVRLSRQLRR

>G5BPM7\_HETGA/64-219  
FLYHFNKVRWAGRHEITYLCYVVKRDSATSLDFGLRNLKNGCHVELLFLRYISDWLDPGRYRVWTFWSPCYDCARHVANFLRCPNLSRIFTARLYFCEDRKEPEGLRRLHRAGVQIAIMTFKDYFCWNTFVENERTFKAWEGHLENSVRLSRQLRR

>L5KIU3\_PTEAL/6-173  
FLYHFNKVRWAGRHEITYLCYVVKRDSATSLDFGLRNLKNGCHVELLFLRYISDWLDPGRYRVWTFWSPCYDCARHVANFLRCPNLSRIFTARLYFCEDRKEPEGLRRLHRAGVQIAIMTFKDYFCWNTFVENERTFKAWEGHLENSVRLSRQLRR

>F1SLW5\_PIG/11-179  
FLYQFNKVRWAGRHEITYLCYVVKRDSATSLDFGLRNLKNGCHVELLFLRYISDWLDPGRYRVWTFWSPCYDCARHVANFLRCPNLSRIFTARLYFCEDRKEPEGLRRLHRAGVQIAIMTFKDYFCWNTFVENERTFKAWEGHLENSVRLSRQLRR

>S7N9P5\_MYOBR/10-177  
FLYHFNKVRWAGRHEITYLCYVVKRDSATSLDFGLRNLKNGCHVELLFLRYISDWLDPGRYRVWTFWSPCYDCARHVANFLRCPNLSRIFTARLYFCEDRKEPEGLRRLHRAGVQIAIMTFKDYFCWNTFVENERTFKAWEGHLENSVRLSRQLRR

>G1TZP8\_RABIT/6-173  
FLYHFNKVRWAGRHEITYLCYVVKRDSATSLDFGLRNLKNGCHVELLFLRYISDWLDPGRYRVWTFWSPCYDCARHVANFLRCPNLSRIFTARLYFCEDRKEPEGLRRLHRAGVQIAIMTFKDYFCWNTFVENERTFKAWEGHLENSVRLSRQLRR

>G3V7Y8\_RAT/11-178  
FLYHFNKVRWAGRHEITYLCYVVKRDSATSLDFGLRNLKNGCHVELLFLRYISDWLDPGRYRVWTFWSPCYDCARHVANFLRCPNLSRIFTARLYFCEDRKEPEGLRRLHRAGVQIAIMTFKDYFCWNTFVENERTFKAWEGHLENSVRLSRQLRR

>G1KTX0\_ANOCA/12-179  
FLYHFNKVRWAGRHEITYLCYVVKRDSATSLDFGLRNLKNGCHVELLFLRYISDWLDPGRYRVWTFWSPCYDCARHVANFLRCPNLSRIFTARLYFCEDRKEPEGLRRLHRAGVQIAIMTFKDYFCWNTFVENERTFKAWEGHLENSVRLSRQLRR

>F7EGY6\_XENTR/13-181  
FLYHFNKVRWAGRHEITYLCYVVKRDSATSLDFGLRNLKNGCHVELLFLRYISDWLDPGRYRVWTFWSPCYDCARHVANFLRCPNLSRIFTARLYFCEDRKEPEGLRRLHRAGVQIAIMTFKDYFCWNTFVENERTFKAWEGHLENSVRLSRQLRR

>H3ALQ6\_LATCH/20-149  
FLYHFNKVRWAGRHEITYLCYVVKRDSATSLDFGLRNLKNGCHVELLFLRYISDWLDPGRYRVWTFWSPCYDCARHVANFLRCPNLSRIFTARLYFCEDRKEPEGLRRLHRAGVQIAIMTFKDYFCWNTFVENERTFKAWEGHLENSVRLSRQLRR

>A0A0P7ULF7\_9TELE/8-184  
FIYHFNKVRWAGRHEITYLCYVVKRDSATSLDFGLRNLKNGCHVELLFLRYISDWLDPGRYRVWTFWSPCYDCARHVANFLRCPNLSRIFTARLYFCEDRKEPEGLRRLHRAGVQIAIMTFKDYFCWNTFVENERTFKAWEGHLENSVRLSRQLRR

>B3DGZ0\_DANRE/15-191

FIFHYKNVRWAGRHEHYLFCVVKRIGPDSLDFGHLRNRGCHVELLFLRHLGALCPGLCSYVTFWCSWSPSCAKQAHLFSQTPNLRIRFVSRLYFCDEEDSREGLRHLKRAQVQISVMTYKDFYCWQTFVARERSFKAWDGLHENSVRVLRKLNQ  
>I3K4U3\_ORENI/15-191  
FLYHYKNVRWAGRNETYLCVVKRIGPDSLDFGHLRNRGCHVELLFLRQLGTLCPGLSYITWFCWSPANCSSRLAQFLKQTPNLRIRFVSRLYFCDEEDSREGLRLLKVKVGHITVMSYKDFYCWQTFVARERSFKAWDGLHENSVRVLRKLNQ  
>A0A0F8AS01\_LARCR/15-192  
FIFHYKNVRWAGRHEHYLFCVVKRIGPDSLDFGHLRNRGCHVELLFLRHLGALCPGLCSYVTFWCSWSPCADCSFRLSOFLNRTNPNLRIRFVSRLYFCDEEDSREGLRMLKAGAHITVMSYKDFYCWQTFVARERSFKAWDGLHENSVRVLRKLNQ  
>H2SYA6\_TAKRU/15-192  
FIFHYKNVRWAGRHEHYLFCVVKRIGPDSLDFGHLRNRGCHVELLFLRHLGALCPGLCSYVTFWCSWSPCNCISQLCLNNTNPNLRIRFVSRLYFCDEEDSREGLRMLTKAGVSRVMSYKDFYCWQTFVARERSFKAWDGLHENSVRVLRKLNQ  
>G3P8J1\_GASAC/15-192  
FIFHYKNVRWAGRHEHYLFCVVKRIGPDSLDFGHLRNRGCHVELLFLRHLGALCPGLCSYITWFCWSPCNCISLSQFLSRTNPNLRIRFVSRLYFCDEEDSREGLRMLTKAGVQVTVMSYKDFYCWQTFVARERSFKAWDGLHENSVRVLRKLNQ  
>W5L8S5\_ASTMX/15-190  
FIFHYKNVRWAGRHEHYLFCVVKRIGPDSLDFGHLRNRGCHVELSEIQSFAFCPALVQNDKSKRISTDESLEHQIETSLDKTPKIKVFLSLFVTLANHSHPQMSADLCLCVPIFLTFDFYCWQTFVARERSFKAWDGLHENSVRVLRKLNQ  
>H2M862\_ORYLA/11-188  
FIFHYKNVRWAGRHEHYLFCVVKRIGPDSLDFGHLRNRGCHVELLFLRHLGALCPGLCSYITWFCWSPCANCISRLAQFLSRTNPNLRIRFVSRLYFCDEEDSREGLRMLTKVGHITVMSYKDFYCWQTFVARERSFKAWDGLHENSVRVLRKLNQ  
>A0A096M3S2\_POEFO/26-203  
FIFHYKNVRWAGRHEHYLFCVVKRIGPDSLDFGHLRNRGCHVELLFLRHLGALCPGLCSYITWFCWSPCANCISRLAQFLSRTNPNLRIRFVSRLYFCDEEDSREGLRMLTKAGVHITVMSYKDFYCWQTFVARERSFKAWDGLHENSVRVLRKLNQ  
>A0A087XZ4\_POEFO/119-308  
FIFHYKNVRWAGRHEHYLFCVVKRIGPDSLDFGHLRNRGCHVELLFLRHLGALCPGLCSYITWFCWSPCANCISRLAQFLSRTNPNLRIRFVSRLYFCDEEDSREGLRMLTKAGVHITVMSYKDFYCWQTFVARERSFKAWDGLHENSVRVLRKLNQ  
>K7G3N4\_PELSI/9-176  
FLYFNKLRWAGRHEHYLFCVVKRIGPDSLDFGHLRNRGCHVELFLRYISAWDLDPGRYRITWFTSWSPCYDCARHVADFLRAYPNLTRIFAARLYFCEDRPEGLRRLHRAGAHIAIMTKDFYCWQTFVARERSFKAWDGLHENSVRVLRKLNQ  
>A0A151P6G3\_ALLMI/11-178  
FLYFNKLRWAGRHEHYLFCVVKRIGPDSLDFGHLRNRGCHVELFLRYISAWDLDPGRYRITWFTSWSPCYDCARHVADFLRAYPNLTRIFAARLYFCEDRPEGLRRLHRAGAHIAIMTKDFYCWQTFVARERSFKAWDGLHENSVRVLRKLNQ  
>A0A091GPU6\_BUCRH/9-176  
FLYFNKLRWAGRHEHYLFCVVKRIGPDSLDFGHLRNRGCHVELFLRYISAWDLDPGRYRITWFTSWSPCYDCARHVADFLRAYPNLTRIFAARLYFCEDRPEGLRRLHRAGAHIAIMTKDFYCWQTFVARERSFKAWDGLHENSVRVLRKLNQ  
>A0A093H5I2\_PICPB/9-176  
FLYFNKLRWAGRHEHYLFCVVKRIGPDSLDFGHLRNRGCHVELFLRYISAWDLDPGRYRITWFTSWSPCYDCARHVADFLRAYPNLTRIFAARLYFCEDRPEGLRRLHRAGAHIAIMTKDFYCWQTFVARERSFKAWDGLHENSVRVLRKLNQ  
>A0A099Y9C6\_TINGU/9-176  
FLYFNKLRWAGRHEHYLFCVVKRIGPDSLDFGHLRNRGCHVELFLRYISAWDLDPGRYRITWFTSWSPCYDCARHVADFLRAYPNLTRIFAARLYFCEDRPEGLRRLHRAGAHIAIMTKDFYCWQTFVARERSFKAWDGLHENSVRVLRKLNQ  
>A0A091RVC9\_NESNO/9-176  
FLYFNKLRWAGRHEHYLFCVVKRIGPDSLDFGHLRNRGCHVELFLRYISAWDLDPGRYRITWFTSWSPCYDCARHVADFLRAYPNLTRIFAARLYFCEDRPEGLRRLHRAGAHIAIMTKDFYCWQTFVARERSFKAWDGLHENSVRVLRKLNQ  
>A0A091MHE0\_9PASS/9-176  
FLYFNKLRWAGRHEHYLFCVVKRIGPDSLDFGHLRNRGCHVELFLRYISAWDLDPGRYRITWFTSWSPCYDCARHVADFLRAYPNLTRIFAARLYFCEDRPEGLRRLHRAGAHIAIMTKDFYCWQTFVARERSFKAWDGLHENSVRVLRKLNQ  
>A0A093PQH0\_9PASS/9-176  
FLYFNKLRWAGRHEHYLFCVVKRIGPDSLDFGHLRNRGCHVELFLRYIAAWDLDPGRYRITWFTSWSPCYDCAQHVANFLRSPNLTRIFAARLYFCEDRPEGLRRLHRAGAHIAIMTKDFYCWQTFVARERSFKAWDGLHENSVRVLRKLNQ  
>A0A091EUR4\_CORBR/9-176  
FLYFNKLRWAGRHEHYLFCVVKRIGPDSLDFGHLRNRGCHVELFLRYIAAWDLDPGRYRITWFTSWSPCYDCAQHVANFLRSPNLTRIFAARLYFCEDRPEGLRRLHRAGAHIAIMTKDFYCWQTFVARERSFKAWDGLHENSVRVLRKLNQ  
>TONHJ8\_CAMFR/146-317  
FTFNHNRKTRKTHKTYLCEVEIHGDSGIPDKGFLCNKCHEVLLYLLGRIRSWKDRKLCRHLTCFISWTPCGTCAELAEFLKENSHVSLCIFASRIYSLNDYEAGLRQLTQEAQAIAIMTKDFYCWQTFVARERSFKAWDGLHENSVRVLRKLNQ  
>H9GWR3\_CANLF/15-197  
FTQNFNDNPKTYLCEVEIHDGSSGVLDKGSAPFGGQAEWFLLEHRSRNLQDLKSYKTCFLSWTPCEKAEIIRFLAKNRHVSLSIASRIYTMGPYVKGRELYDAGVHISIMTFRDFEYCWQTFVARERSFKAWDGLHENSVRVLRKLNQ  
>H0XN38\_OTOGA/18-197  
FTSNFTNPAIGRRQTYLCEVEIHDGSSGVLDKGSAPFGGQAEWFLLEHRSRNLQDLKSYKTCFLSWTPCEKAEIIRFLAKNRHVSLSIASRIYTMGPYVKGRELYDAGVHISIMTFRDFEYCWQTFVARERSFKAWDGLHENSVRVLRKLNQ  
>G3SVX3\_LOXAF/11-178  
FRFNFINDASVGGQTYLCEVEIHDGSSGVLDKGSAPFGGQAEWFLLEHRSRNLQDLKSYKTCFLSWTPCEKAEIIRFLAKNRHVSLSIASRIYTMGPYVKGRELYDAGVHISIMTFRDFEYCWQTFVARERSFKAWDGLHENSVRVLRKLNQ  
>G3TLG1\_LOXAF/31-201  
QQLNFINDASVGGQTYLCEVEIHDGSSGVLDKGSAPFGGQAEWFLLEHRSRNLQDLKSYKTCFLSWTPCEKAEIIRFLAKNRHVSLSIASRIYTMGPYVKGRELYDAGVHISIMTFRDFEYCWQTFVARERSFKAWDGLHENSVRVLRKLNQ  
>G1TLT9\_RABIT/18-182  
FMDHFANEDGGGLNETYLCYVEIHDGSSGVLDKGSAPFGGQAEWFLLEHRSRNLQDLKSYKTCFLSWTPCEKAEIIRFLAKNRHVSLSIASRIYTMGPYVKGRELYDAGVHISIMTFRDFEYCWQTFVARERSFKAWDGLHENSVRVLRKLNQ  
>S7N2R7\_MYOB/2-126  
CFDGNRRPRAELCFALFQSWHLNEGQYRLTYWYSSWSPYDPCVPLVEFLGDNNSVLRIFAAGHSIFTGYKRELRLRDAGAQAIAIMTLEELRWELGEMATWRWQEN  
>L7N100\_MYOLU/15-180  
FKENFANTWENETELCYEVEIHDGSSGVLDKGSAPFGGQAEWFLLEHRSRNLQDLKSYKTCFLSWTPCEKAEIIRFLAKNRHVSLSIASRIYTMGPYVKGRELYDAGVHISIMTFRDFEYCWQTFVARERSFKAWDGLHENSVRVLRKLNQ  
>G1Q326\_MYOLU/19-187  
EWNFGHDWEKTYLCEVEIHDGSSGVLDKGSAPFGGQAEWFLLEHRSRNLQDLKSYKTCFLSWTPCEKAEIIRFLAKNRHVSLSIASRIYTMGPYVKGRELYDAGVHISIMTFRDFEYCWQTFVARERSFKAWDGLHENSVRVLRKLNQ  
>G1PQB2\_MYOLU/4-177  
FKDNFGHNWETKYLYEVEIHDGSSGVLDKGSAPFGGQAEWFLLEHRSRNLQDLKSYKTCFLSWTPCEKAEIIRFLAKNRHVSLSIASRIYTMGPYVKGRELYDAGVHISIMTFRDFEYCWQTFVARERSFKAWDGLHENSVRVLRKLNQ  
>L5M566\_MYODS/4-175  
FKDNFGITWANETKYLYEVEIHDGSSGVLDKGSAPFGGQAEWFLLEHRSRNLQDLKSYKTCFLSWTPCEKAEIIRFLAKNRHVSLSIASRIYTMGPYVKGRELYDAGVHISIMTFRDFEYCWQTFVARERSFKAWDGLHENSVRVLRKLNQ  
>G1QB54\_MYOLU/17-183  
FKRNFNRKCKNQTLYEVEIHDGSSGVLDKGSAPFGGQAEWFLLEHRSRNLQDLKSYKTCFLSWTPCEKAEIIRFLAKNRHVSLSIASRIYTMGPYVKGRELYDAGVHISIMTFRDFEYCWQTFVARERSFKAWDGLHENSVRVLRKLNQ  
>G1NTH0\_MYOLU/7-175  
EVNFGHDWEKTYLCEVEIHDGSSGVLDKGSAPFGGQAEWFLLEHRSRNLQDLKSYKTCFLSWTPCEKAEIIRFLAKNRHVSLSIASRIYTMGPYVKGRELYDAGVHISIMTFRDFEYCWQTFVARERSFKAWDGLHENSVRVLRKLNQ  
>L7N100\_MYOLU/194-364  
KRRNFNRKCKNQTLYEVEIHDGSSGVLDKGSAPFGGQAEWFLLEHRSRNLQDLKSYKTCFLSWTPCEKAEIIRFLAKNRHVSLSIASRIYTMGPYVKGRELYDAGVHISIMTFRDFEYCWQTFVARERSFKAWDGLHENSVRVLRKLNQ  
>G1QB54\_MYOLU/248-406  
AEKLFKLLQVYCYFLGKIEGRDQPRHAELCFDRVRSWHLDEGQYRLTYCISWSPCDCAQKLEFLGNSHVSLRIFAARIYKRDYKHWLRQLRDAGAQAIAIMTLEELRWELGEMATWRWQEN  
>G1PBV8\_MYOLU/144-276  
FRVNFYSYRERKTYLCEVEIHDGSSGVLDKGSAPFGGQAEWFLLEHRSRNLQDLKSYKTCFLSWTPCEKAEIIRFLAKNRHVSLSIASRIYTMGPYVKGRELYDAGVHISIMTFRDFEYCWQTFVARERSFKAWDGLHENSVRVLRKLNQ  
>G1Q0Q6\_MYOLU/140-315  
FKDNFSHRRARRTYLYEVEIHDGSSGVLDKGSAPFGGQAEWFLLEHRSRNLQDLKSYKTCFLSWTPCEKAEIIRFLAKNRHVSLSIASRIYTMGPYVKGRELYDAGVHISIMTFRDFEYCWQTFVARERSFKAWDGLHENSVRVLRKLNQ  
>G1Q0G3\_MYOLU/13-186  
FKENFSHRRARRTYLYEVEIHDGSSGVLDKGSAPFGGQAEWFLLEHRSRNLQDLKSYKTCFLSWTPCEKAEIIRFLAKNRHVSLSIASRIYTMGPYVKGRELYDAGVHISIMTFRDFEYCWQTFVARERSFKAWDGLHENSVRVLRKLNQ  
>A0A096NK44\_PAPAN/18-195  
FTFNFNDSVGRHQTYLCEVEIHDGSSGVLDKGSAPFGGQAEWFLLEHRSRNLQDLKSYKTCFLSWTPCEKAEIIRFLAKNRHVSLSIASRIYTMGPYVKGRELYDAGVHISIMTFRDFEYCWQTFVARERSFKAWDGLHENSVRVLRKLNQ  
>A0A09R289\_CHLSB/198-375  
FTFNFNDSVGRHQTYLCEVEIHDGSSGVLDKGSAPFGGQAEWFLLEHRSRNLQDLKSYKTCFLSWTPCEKAEIIRFLAKNRHVSLSIASRIYTMGPYVKGRELYDAGVHISIMTFRDFEYCWQTFVARERSFKAWDGLHENSVRVLRKLNQ

>F7FXK1\_MACMU/18-195  
FTSNFNNDVSVGRHQTYLCEVEVDNGTWMVMDRGLNQGCHAEFLCFLGWVSPWQLDPAQTYRVTFWISWSPCFSWGCAEQVRAFLQENTHVRHLIFAARIYDPLYQALRTLDRDAGAQSIMTYDEFYCWDTFVDCGCPFPWDGLDEHSQALSERLRA

>G1RY77\_NOMLE/198-375  
FTFNFNNDPLVGRHQTYLCEVEVDNGTWMVMDRGLNQGRRHTELFLGLIPYWLQDLAQTYRVTFWISWSPCFSWGCAEQVRAFLQENTHMLRIFAARIYDPLYKEALQMLRGAGAQSIMTYDEFYCWDTFVDHGRFPFPWDGLEEHSQALSGLRLQA

>H2P4E7\_PONAB/198-375  
FTFNFNNDPFRRHQTYLCEVEVDNGTWMVMDRGLNQGRRHAEFLGLLPLWQDPAQTYRVTFWISWSPCFSWGCAEQVRAFLQENTHVRHLIFAARIYDPLYKEALQMLRDAGAQSIMTYDEFYCWDTFVDHGRFPFPWDGLEEHSQALSGLKLA

>G1RY74\_NOMLE/16-192  
FTSNFNNGRWHKTYLCEVEVDNGTWMVMDRGLNQGRRHAEFLDLVPSLQDPAQTYRVTFWISWSPCFSWGCAEQVRAFLQENTHVRHLIFAARIYDPLYKEALQMLRDAGAQSIMTYHEFKHCWDTFVDHGRFPFPWDGLEEHSQALSGLRLQA

>H2QLP4\_PANTR/16-192  
FTSNFNNGRRKTYLCEVEVDNGTVMVMDRGLNQGRRHAEFLDLVPSLQDPAQTYRVTFWISWSPCFSWGCAEQVRAFLQENTHVRHLIFAARIYDPLYKEALQMLRDAGAQSIMTYDEFKHCWDTFVDHGRFPFPWDGLEEHSQALSGLRLRA

>G3S2J9\_GORGO/18-195  
FTSNFNNDLLVRRHQTYLCEVEVDNGTWMVMDRGLNQGRRHAEFLDLVPSLQDPAQTYRVTFWISWSPCFSWGCAEQVCEFLQENTHMLRIFAARIYDPLYKALQMLRDAGAQSIMTYDEFKHCWDTFVYRGCPFPFPWDGLEEHSQALSGLRLQA

>H2QLP5\_PANTR/198-375  
FTFNFNNDPLVRRHQTYLCEVEVDNGTWMVMDRGLNQGRRHAEFLDLVPSLQDPAQTYRVTFWISWSPCFSWGCAEQVRAFLQENTHVRHLIFAARIYDPLYKEALQMLRDAGAQSIMTYDEFYCWDTFVYRGCPFPFPWDGLEEHSQALSGLRLRA

>G3QV16\_GORGO/198-375  
FTFNFNNDPLVRRHQTYLCEVEVDNGTWMVMDRGLNQGRRHAEFLDLVPSLQDPAQTYRVTFWISWSPCFSWGCAEQVCEFLQENTHMLRIFAARIYDPLYKALQMLRDAGAQSIMTYDEFKHCWDTFVYRGCPFPFPWDGLEEHSQALSGLRLQA

>A0A096N7U5\_PAPAN/178-346  
FTYNTNDPSVGHQHTYLCYKVECDNDTWLWDLKGPINQHAEQYFLYLISFWKLDQAQCYRVTFWISWSTCFSCAQQVATFHWHENRCVSLHIFARIYNYLPGYEGLCMLQRAGTQISIMTSKFRHCWTFVDHGHFPFPWDGLDEHSQALSGLRLQA

>F6QU3\_MACMU/171-340  
FTYNTNDPSVGHQHTYLCYKVECDNDTWLWDLKGPINQHAEQYFLYLISFWKLDQAQCYRVTFWISWSTCFSCAQQVATFHWHENRCVSLHIFACIYNYLPGYEGLCMLQRAGTQISIMTSKFRHCWTFVDHGHFPFPWDGLDEHSQALSGLRLQA

>H9KW44\_CALJA/143-282  
FTYNTNDPSVGRHQTYLCEVEHHNGTWWLHRGFLNQRHAEFLCLLDLIFWKLDAQRYVTCFISWSPCFCAEKVAEFLQENPHVNLRIFAARIYQYRQYKGRRLNRAGAPISMMKY

>F7CUA6\_CALJA/202-377  
FTYNTNDPSVGHQHTYLCYVEHHNGTWWLHRGFLNQRHAEFLCLLDLISFWKLDQAQYVTCFISWSPCFCAEKVAEFLQENPHVNLHIFAARIYQYRQYKGRRLNRAGAPISMMKYSEFSYCWDTFVDHEHPFPWEGLEDEYTAQALSGLKLA

>A0A09R229\_CHLSB/213-376  
FTSNFNKFPWVGRQRETYLCYKVERHNDTWLNRGLNQRHAEFLDLIPFWKLDQAQYVTCFISWSPCFSCAOKMAKFSKNKHVSLCIFAARIYDQGRCOEGLRTLHRDGAKIAMNMYSEFEYCWDTFVDRGXXXLVGKPCD

>ABC3G\_PAPAN/202-376  
FTSNFNKFPWVGHQHTYLCYKVERHNGTWWLNRGLNQRHAEFLDLIPFWKLDQAQYVTCFISWSPCFSCAOKMAKFSKNKHVSLCIFAARIYDQGRCOEGLRTLHRDGAKIAMNMYSEFEYCWDTFVDRGRRFPFPWDGLDEHSQALSGLRLRA

>ABC3G\_MACMU/195-369  
FTSNFNKFPWVGHQHTYLCYKVERHNDTWLNRGLNQRHAEFLDLIPFWKLDQAQYVTCFISWSPCFSCAOKMAKFSKNKHVSLCIFAARIYDQGRCOEGLRALHRDGAKIAMNMYSEFEYCWDTFVDRGRRFPFPWDGLDEHSQALSGLRLRA

>H2P4E9\_PONAB/216-391  
FTSNFNNEPCVGRHETLYCYKVERHNDTWLNRGLNQRHAEFLDVIPIFWKLDQAQYVTCFISWSPCFCAEQMAKFSKNKHVSLCIFAARIYDQGRCKEGLRTLDEAEAKISIMTYSEFKHCWDTFVDHGRFPFPWDGLEEHSQALSGLKLA

>ABC3G\_GORGO/202-377  
FTSNFNNEHWGRHETLYCYVEERHNDTWLNRGLNQRHAEFLDVIPIFWKLDLHQDYRVTCFISWSPCFSCAOKMAKFSKNKHVSLCIFAARIYDQGRCKEGLRTLAEGAKISIMTYSEFKHCWDTFVYHGGFPFPWDGLEEHSQALSGLRLQA

>G3SF86\_GORGO/202-375  
FTSNFNNEHWGRHETLYCYVEERHNDTWLNRGLNQRHAEFLDVIPIFWKLDLHQDYRVTCFISWSPCFSCAOKMAKFSKNKHVSLCIFAARIYDQGRCKEGLRTLAEGAKISIMTYSEFKHCWDTFVDHGGFPFPWDGLEEHSQALSGLDRA

>L9KAV2\_TUPCH/18-186  
FNHFYKMLQRAGRRKTYLCLLEEREGAIVDGVLHNQEHAEERRFLSSPDILQLDGGRRYRVTWYLSWSPCSQCARAVAGFLAQHGNVSLRIFARLYNHEDPENRQGLRTLSTGTPIRVMNTREFALCWERFVRHQGAFAEPWAGLRENADLLGLQLED

>Q8D1S6\_XENTR/55-231  
FMFQFNVEYSGRNKTLCLYVTRPEQGQVHGYLEDESAHAEEAFFTLPQLTSGSVTVTCVSSSPCVNCAAAVQQLRRNKTRIVLQAVARLQWEEPEIRALKGLRSAGCQVRRMKGADYVYVWKNFVDPHQDFIPWEDLEENARYEYKLEKE

>A0A0P7WY8\_9TELE/108-272  
FKFQFNVEYSGRNKTLCLFLVDVQSSGGEGRLGYLEDEGAHAEEAFFQVQLPQDSALHYMVTWYVSSSPCAACTAKVLEIKARKTMRITFSARLFMWEPEIQVGLKALAAAGCKLRMMKPTDFYVWDTFVENDQTFPWPEDCOENYEEYQEKLAD

>F1RAQ7\_DANRE/104-270  
FKFQFNVEYSGRNKTLCLFLVDVQSSGGEGRLGYLEDEGAHAEEAFFQVQLPQDSALHYMVTWYVSSSPCAACTAKVLEIKARKTMRITFSARLFMWEPEIQVGLKALAAAGCKLRMMKPTDFYVWDTFVENDQTFPWPEDCOENYEEYQEKLAD

>H2LVW2\_ORYLA/81-243  
FKFQFNVEYSGRNKTLCLFRVDTAGGSTEPLRGYMEDETAHAEEAFFQVQLPNSQYEVDTWYVSSSPCVCAAKLTSILQQRKRLSVFCRSLFDWEEPEIQVGLKALVQAGCKLQMMKPADFQHWVWETVYKQDSFTLWEDCKENYEEYKLEKLD

>A0A087X5U3\_POEFO/101-263  
FKFQFNVEYSGRNKTLCLFRVDTAGGSTEPLRGYMEDETAHAEEAFFQVQLPNSQYEVDTWYVSSSPCVCAAKLTSILQQRKRLSVFCRSLFDWEEPEIQVGLKALVQAGCKLQMMKPADFQHWVWETVYKQDSFTLWEDCKENYEEYKLEKLD

>G3P582\_GASAC/83-245  
FKFQFNVEYSGRNKTLCLFRVDTAGGSTEPLRGYMEDETAHAEEAFFQVQLPNSQYEVDTWYVSSSPCVCAAKLTSILQQRKRLSVFCRSLFDWEEPEIQVGLKALVQAGCKLQMMKPADFQHWVWETVYKQDSFTLWEDCKENYEEYKLEKLD

>H2U6E4\_TAKRU/97-259  
FKFQFNVEYSGRNKTLCLFRVDTAGGSTEPLRGYMEDETAHAEEAFFQVQLPNSQYEVDTWYVSSSPCVCAAKLTSILQQRKRLSVFCRSLFDWEEPEIQVGLKALVQAGCKLQMMKPADFQHWVWETVYKQDSFTLWEDCKENYEEYKLEKLD

>A0A0P7V3P5\_9TELE/68-234  
FKFQFNVEYSGRNKTLCLFLVDSQGEDELQRYLEDEGAHAEEAFFQVQLPEDPGRYQVTVYVSSSPCAACAALAEILRARPRTLIFSARLFMWEPEIQVGLKALVQAGCKLQMMKPADFQHWVWETVYKQDSFTLWEDCKENYEEYKLEKLD

>W5KNC9\_ASTMX/26-194  
FRFQFNVEYSGRNKTLCLYLDVQSSGADGLRGLFLEDEGLHAEAFFQLIPQDPSVNTVTVYVSSSPCAHCCSKLEILQERKTLRLNIFARLFMWEPEIQVGLKALVQAGCKLQMMKPADFQHWVWETVYKQDSFTLWEDCKENYEEYKLEKLD

>H2M4W2\_ORYLA/70-234  
FKFQFNVEYSGRNKTLCLYLDVQSSGADGLRGLFLEDEGLHAEAFFQLIPQDPSVNTVTVYVSSSPCAHCCSKLEILQERKTLRLNIFARLFMWEPEIQVGLKALVQAGCKLQMMKPADFQHWVWETVYKQDSFTLWEDCKENYEEYKLEKLD

>H2TE47\_TAKRU/80-244  
FKFQFNVEYSGRNKTLCLYLDVQSSGADGLRGLFLEDEGLHAEAFFQLIPQDPSVNTVTVYVSSSPCAHCCSKLEILQERKTLRLNIFARLFMWEPEIQVGLKALVQAGCKLQMMKPADFQHWVWETVYKQDSFTLWEDCKENYEEYKLEKLD

>I3JAF9\_ORENI/80-244  
FKFQFNVEYSGRNKTLCLYLDVQSSGADGLRGLFLEDEGLHAEAFFQLIPQDPSVNTVTVYVSSSPCAHCCSKLEILQERKTLRLNIFARLFMWEPEIQVGLKALVQAGCKLQMMKPADFQHWVWETVYKQDSFTLWEDCKENYEEYKLEKLD

>A0A0F8B74\_LARCR/500-664  
FKFQFNVEYSGRNKTLCLYLDVQSSGADGLRGLFLEDEGLHAEAFFQLIPQDPSVNTVTVYVSSSPCAHCCSKLEILQERKTLRLNIFARLFMWEPEIQVGLKALVQAGCKLQMMKPADFQHWVWETVYKQDSFTLWEDCKENYEEYKLEKLD

>G3PCV8\_GASAC/21-185  
FKFQFNVEYSGRNKTLCLYLDVQSSGADGLRGLFLEDEGLHAEAFFQLIPQDPSVNTVTVYVSSSPCAHCCSKLEILQERKTLRLNIFARLFMWEPEIQVGLKALVQAGCKLQMMKPADFQHWVWETVYKQDSFTLWEDCKENYEEYKLEKLD

>A0A151P4M1\_ALLMI/14-181  
FKFQFNVEYSGRNKTLCLYLDVQSSGADGLRGLFLEDEGLHAEAFFQLIPQDPSVNTVTVYVSSSPCAHCCSKLEILQERKTLRLNIFARLFMWEPEIQVGLKALVQAGCKLQMMKPADFQHWVWETVYKQDSFTLWEDCKENYEEYKLEKLD

>K7G457\_PELSI/58-225  
FKFQFNVEYSGRNKTLCLYLDVQSSGADGLRGLFLEDEGLHAEAFFQLIPQDPSVNTVTVYVSSSPCAHCCSKLEILQERKTLRLNIFARLFMWEPEIQVGLKALVQAGCKLQMMKPADFQHWVWETVYKQDSFTLWEDCKENYEEYKLEKLD

>M7B9Y3\_CHEMY/50-217  
FKFQFNVEYSGRNKTLCLYLDVQSSGADGLRGLFLEDEGLHAEAFFQLIPQDPSVNTVTVYVSSSPCAHCCSKLEILQERKTLRLNIFARLFMWEPEIQVGLKALVQAGCKLQMMKPADFQHWVWETVYKQDSFTLWEDCKENYEEYKLEKLD

>V8P1W3\_OPHHA/51-183  
FNFFQFNVEYSGRNKTLCLYLDVQSSGADGLRGLFLEDEGLHAEAFFQLIPQDPSVNTVTVYVSSSPCAHCCSKLEILQERKTLRLNIFARLFMWEPEIQVGLKALVQAGCKLQMMKPADFQHWVWETVYKQDSFTLWEDCKENYEEYKLEKLD

>G1KSP1\_ANOCA/17-185  
FKFQFNVEYSGRNKTLCLYLDVQSSGADGLRGLFLEDEGLHAEAFFQLIPQDPSVNTVTVYVSSSPCAHCCSKLEILQERKTLRLNIFARLFMWEPEIQVGLKALVQAGCKLQMMKPADFQHWVWETVYKQDSFTLWEDCKENYEEYKLEKLD

>R7VNA1\_COLLI/52-220  
FKFQFRNVEYSGRNTFLCYVVEVETQGRESVTSRGYLEDEAAHAEAFFNTILPKESSARYNVTVYVSSSPCVTCADRITETLKKKNLRLTIMVGRFLMWEPEMQAALKNMRAAGCKLRIMKPDFFEYVWQNFVEQEAQAFVPWEDIQENFYEEKLAE

>H1A4Q1\_TAEGU/51-219  
FKFQFRNVEYSGRNTFLCYVVEVETQKQEPVTSRGYLEDEAAHAEAFFNTILPQAGARHDVTVYVSSSPCVTCAORICEALRKNLGLRLTIMVGRFLMWEPEMQAALRSMKEAGCKLRIMKPDFFEYVWQNFVEQEAQAFVPWEDIQENFYEEKLAE

>R0L7B9\_ANAPL/57-225  
FKFQFRNVEYSGRNTFLCYVVEVETQKQESVTSRGYLEDEAAHAEAFFNTILPKESSRYNVTVYVSSSPCVTCADRITETLKKKNLRLTIMVGRFLMWEPEMQAALKMKMKSAGCKLRIMKPDFFEYVWQNFVEQEAQAFVPWEDIQENFYEEKLAE

>A0A0Q3TEK9\_AMAAE/51-219  
FKFQFRNVEYSGRNTFLCYVVEVETQKQESATSRGYLEDEAAHAEAFFNTILPKDSSLRYNVTVYVSSSPCVTCAERIIETLKKKNLRLTIMVGRFLMWEPEMQAALKMKMKSAGCKLRIMKPDFFEYVWQNFVEQEAQAFVPWEDIQENFYEEKLAE

>F1NNK5\_CHICK/51-219  
FKFQFRNVEYSGRNTFLCYVVEVETQKQESKTSRGYLEDEASHAEIAFFNTILPKESSRYNVTVYVSSSPCVTCADRISETLKKKNLRLTIMVGRFLMWEPEMQAALKMKMKSAGCKLRIMKPDFFEYVWQNFVEQEAQAFVPWEDIQENFYEEKLAE

>F6PKH9\_ORNAN/19-179  
FKFQFRNVEYSGRNTFLCYVVEVETQKQENQARGYLEDEAAHAEAFFNSILPADQALKYNVTVYVSSSPCAACADRIADTLRRTPNLRLLLVGRFLMWEPEMQAALKMKMKSAGCKLRIMKPDFFEYVWQNFVEQEAQAFVPWEDIQENFY

>F7EXQ1\_MONDO/49-218  
FKFQFRNVEYSGRNTFLCYVVEVQKQGOISRGYLEDEAAHAEAFFKTLPTDPALRYNVTVYVSSSPCAACADRISSLTKTKNLMKLLVGRFLMWEPEIKTALKKESGCKLRIMKPDFFEYVWQNFVEQESKAFVPWEDIQENFYEEKLAE

>G3WZU9\_SARHA/50-219  
FKFQFRNVEYSGRNTFLCYVVEVQKQGOISRGYLEDETAHAEIAFFKTLPTDPALRYNVTVYVSSSPCAACADRISSLTKTKNLMKLLVGRFLMWEPEIKALKRLEAGCKLRIMKPDFFEYVWQNFVEQESKAFVPWEDIQENFYEEKLAE

>I3N5I3\_ICTTR/52-221  
FKFQFRNVEYSGRNTFLCYVVEAQKQVQASRGYLEDEAAHAEIAFFNTILPTDPSLRNVTVYVSSSPCAACADRIKTLGKTKNLMKLLVGRFLMWEPEIQTALKKESGCKLRIMKPDFFEYVWQNFVEQESKAFEPWEDIQENFYEEKLAE

>A0A0B4J21\_PONAB/52-221  
FKFQFRNVEYSGRNTFLCYVVEAQKQVQASRGYLEDEAAHAEIAFFNTILPADPALRYNVTVYVSSSPCAACADRIKTLGKTKNLMKLLVGRFLMWEPEIQDALKKESGCKLRIMKPDFFEYVWQNFVEQESKAFEPWEDIQENFYEEKLAE

>F6QZ00\_CALJA/52-221  
FKFQFRNVEYSGRNTFLCYVVEAQKQVQATRGYLEDEAAHAEIAFFNTILPADPALRYNVTVYVSSSPCAACADRIKTLGKTKNLMKLLVGRFLMWEPEIQALKKLEAGCKLRIMKPDFFEYVWQNFVEQESKAFEPWEDIQENFYEEKLAE

>G3TH88\_LOXAF/52-221  
FKFQFRNVEYSGRNTFLCYVVEAQKQVQASRGYLEDEAAHAEIAFFNTILPADPALRYNVTVYVSSSPCAACADRIKTLGKTKNLMKLLVGRFLMWEPEIQALKKLEAGCKLRIMKPDFFEYVWQNFVEQESKAFEPWEDIQENFYEEKLAE

>H0WL56\_OTOGA/52-221  
FKFQFRNVEYSGRNTFLCYVVEAQKQVQASRGYLEDEAAHAEIAFFNTILPADPALRYNVTVYVSSSPCAACADRIKTLGKTKNLMKLLVGRFLMWEPEIQALKKLEAGCKLRIMKPDFFEYVWQNFVEQESKAFEPWEDIQENFYEEKLAE

>L9KUD0\_TUPCH/52-221  
FKFQFRNVEYSGRNTFLCYVVEAQKQVQATRGYLEDEAAHAEIAFFNTILPADPALRYNVTVYVSSSPCAACADRIKTLGKTKNLMKLLVGRFLMWEPEIQALKRMREAGCKLRIMKPDFFEYVWQNFVEQESKAFEPWEDIQENFYEEKLAE

>G3I9V7\_CRIGR/52-221  
FKFQFRNVEYSGRNTFLCYVVEAQKQVQATRGYLEDEGAHAEIAFFNTILPADPALRYNVTVYVSSSPCAACADRIKTLGKTKNLMKLLVGRFLMWEPEIQALKKLEAGCKLRIMKPDFFEYVWQNFVEQESKAFEPWEDIQENFYEEKLAE

>ABEC2\_MOUSE/52-221  
FKFQFRNVEYSGRNTFLCYVVEAQKQVQATRGYLEDEGAHAEIAFFNTILPADPALRYNVTVYVSSSPCAACADRIKTLGKTKNLMKLLVGRFLMWEPEIQALKKLEAGCKLRIMKPDFFEYVWQNFVEQESKAFEPWEDIQENFYEEKLAE

>F7AZT6\_HORSE/52-221  
FKFQFRNVEYSGRNTFLCYVVEAQKQVQASRGYLEDEAAHAEIAFFNTILPADPALRYNVTVYVSSSPCAACADRIKTLGKTKNLMKLLVGRFLMWEPEIQALKKLEAGCKLRIMKPDFFEYVWQNFVEQESKTFEPWEDIQENFYEEKLAE

>ABEC2\_BOVIN/52-221  
FKFQFRNVEYSGRNTFLCYVVEAQKQVQASRGYLEDETNHAEIAFFNSIMPTDPALRYNVTVYVSSSPCAACADRIKTLGKTKNLMKLLVGRFLMWEPEIQALKKLEAGCKLRIMKPDFFEYVWQNFVEQESKAFEPWEDIQENFYEEKLAE

>S9WK76\_CAMFR/64-233  
FKFQFRNVEYSGRNTFLCYVVEAQKQVQATRGYLEDEAAHAEIAFFNTIMPTDPALRYNVTVYVSSSPCAACADRIKTLGKTKNLMKLLVGRFLMWEPEIQALKKLEAGCKLRIMKPDFFEYVWQNFVEQESKAFEPWEDIQENFYEEKLAE

>F1RVM1\_PIG/52-221  
FKFQFRNVEYSGRNTFLCYVVEAQKQVQATRGYLEDEAAHAEIAFFNTILPADPAVRYNVTVYVSSSPCAACADRIKTLGKTKNLMKLLVGRFLMWEPEIQALKKLEAGCKLRIMKPDFFEYVWQNFVEQESKAFEPWEDIQENFYEEKLAE

>H0V2E8\_CAVPO/56-225  
FKFQFRNVEYSGRNTFLCYVVEAQKQVQASRGYLEDEAAHAEIAFFNSVLPADPALRYNVTVYVSSSPCAACADRIKTLGKTKNLMKLLVGRFLMWEPEIQALKKLEAGCKLRIMKPDFFEYVWQNFVEQESKAFEPWEDIQENFYEEKLAE

>A0A091DJF3\_FUKDA/59-228  
FKFQFRNVEYSGRNTFLCYVVEAQKQVQASRGYLEDEAAHAEIAFFNTILPADPALRYNVTVYVSSSPVACADRIKTLGKTKNLMKLLVGRFLMWEPEIQALKKLEAGCKLRIMKPDFFEYVWQNFVEQESKAFEPWEDIQENFYEEKLAE

>G5BNG8\_HETGA/56-225  
FKFQFRNVEYSGRNTFLCYVVEAQKQVQASRGYLEDEAAHAEIAFFNTILPADPALRYNVTVYVSSSPVACADRIKTLAKTKNLMKLLVGRFLMWEPEMQAALRKLKEAGCKLRIMKPDFFEYVWQNFVEHESKAFEPWEDIQENFYEEKLAE

>G1PHZ8\_MYOLU/58-227  
FKFQFRNVEYSGRNTFLCYVVEAQKQVQASRGYLEDETAHAEIAFFNTVPTDPALRYNVTVYVSSSPVACADRIKMLGKTKNLMKLLVGRFLMWEPEMQAALRKLKEAGCKLRIMKPDFFEYVWQNFVEQESKAFEPWEDIQENFYEEKLAE

>G1U7Q3\_RABIT/55-224  
FKFQFRNVEYSGRNTFLCYVVEAQKQVQATRGYLEDEAAHAEIAFFNTILPADPALRYNVTVYVSSSPCAACADRIKTLGKTKNLMKLLVGRFLMWEPEIQALKKLEAGCKLRIMKPDFFEYVWQNFVEQEAQAFEPWEDIQENFYEEKLAE

>M3W1K8\_FELCA/61-230  
FKFQFRNVEYSGRNTFLCYVVEAQKQVQASRGYLEDEAAHAEIAFFNTILPADPAVRYNVTVYVSSSPCAACADRIKTLGKTKNLMKLLVGRFLMWEPEVQAALRKLKEAGCKLRIMKPDFFEYVWQNFVEQESKAFEPWEDIQENFYEEKLAE

>G1LCS0\_AILME/80-249  
FKFQFRNVEYSGRNTFLCYVVEAQKQVQATRGYLEDEAAHAEIAFFNTILPADPALRYNVTVYVSSSPCAACADRIARTLGKTKNLMKLLVGRFLMWEPEVQAALRKLKEAGCKLRIMKPDFFEYVWQNFVEQEAQAFEPWEDIQENFYEEKLAE

>M3YQH9\_MUSPF/61-230  
FKFQFRNVEYSGRNTFLCYVVEAQKQVQATRGYLEDETNHAEIAFFNTILPSPALRYNVTVYVSSSPCAACADRIARTLGKTKNLMKLLVGRFLMWEPEVQAALRKLKEAGCKLRIMKPDFFEYVWQNFVEQESKAFEPWEDIQENFYEEKLAE

>E2RDL7\_CANLF/52-221  
FKFQFRNVEYSGRNTFLCYVVEAQKQVQASRGYLEDEAAHAEIAFFNTILPTDPALRYNVTVYVSSSPCAACADRIARTLGKTKNLMKLLVGRFLMWEPEVQAALRKLKEAGCKLRIMKPDFFEYVWQNFVEQESKAFEPWEDIQENFYEEKLAE

>S7PKW6\_MYOBR/115-291  
FYFHKNCPDHGRNGCYLYEVKQRGLPLVGTGFENEPKHTEICFLNWFKTQQNLSSREEKYHVTWFMWSWPCFQCARQVVEFLKDHEYVQLSIFVARLYYSSRPEYQQLRSLQGAGAQAAMTDDFAYCRKVFVHDHKPFRYWKGIYNSCSLSTKLEDE

>S7NDM8\_MYOBR/6-177  
FNSFNKLDGGCKSTFLCFEVERDEGSVLYQNGVFRNQHAEICFLIEWHERKLCDAQYHVTWYISWSPCFEAEQVADFLNENENVDLSISAARLYCEDEDEQGLQDLVATGAKVAMMAPEDFKYCWDFNYVNGWQFTYWKVNRNRYGRLOEKLEDE

>S7PKW6\_MYOBR/281-406  
NSCSLSTEDILRHAECLFDWFRKVLCPDAQYHVTWYISWSPCFEAEQVADFLNENENVDLSISAARLYCEDEDEQGLQDLVATGAKVAMMAPEDLTKMVPDETPMDFPS

>TONH8\_CAMFR/406-573  
FSFHFKNLMAFGRNCTYLCYQVQKREHCSVPDKGVQNEPCHAECLFSLWFKNRLSPDECYHITWFMWSWPCFQVAKFLEKNRNVLSIFAARLYYVWQPAVQQLRRLHGVAGCVGMSYQDFKYCWENFYVNRMPFKPWEKQENKSLVTKLEE

>F7DDE1\_HORSE/12-179  
FSFHFKNLMAFGRNCTYLCYQVQKREHCSVPDKGVQNEPCHAECLFSLWFKNRLSPDECYHITWFMWSWPCFQVAKFLEKNRNVLSIFAARLYYVWQPAVQQLRRLHGVAGCVGMSYQDFKYCWENFYVNRMPFKPWEKQENKSLVTKLEE

>F7B644\_HORSE/190-346  
FSFHFKNLMAFGRNCTYLCYQVQKREHCSVPDKGVQNEPCHAECLFSLWFKNRLSPDECYHITWFMWSWPCFQVAKFLEKNRNVLSIFAARLYYVWQPAVQQLRRLHGVAGCVGMSYQDFKYCWENFYVNRMPFKPWEKQENKSLVTKLEE

>F1MP61\_BOVIN/29-199  
FYFQCNLLYARRNCSYICYKVERKYSRAFWDVGFVHNQRCHTELRLFSWFHAEKLRPNERYHITWFMWSWPCMKCAKEVADFLGRHQNVTLSIFTARLYNFQEEGRQGLLRLSDQGAHVDMISYQEFKYCWKFKVNSRRPFRPWKLYRYNQRVLEED

>L5K8J0\_PTEAL/256-426  
FFFEQNLLYAGRKSSYLQCFQVERQHSPPVSDWGFVENQPYHAELCFLNWFRAEKLSPEYHYDVTWFLSWSPCSTCAEIAFLSNHKNRVLISFVSRYYFWKPAFRQGLQELDHLGVLQDAMSDFDFKYCWENFYVNDGMPFRCKWVHRNRYKFLVRLKLE

>M3W3R0\_FELCA/20-189

FRHFPPNLLYAGRKLCYLFCQVETDYFSCDSDRGVFRNKRCHAEQCFLSWFRDQYPCRDYEYVNTVFLWSWSPCTCAEEVVEFLEEYRNLTLISFTSRLLYFYHPNYQQGLRKLWDAGVQLDIMSCDDFEHCWDFNVHDGMRFRQRNLLKDYFLAAELQE

>G1LWD3\_AILME/20-186  
FFFQFPSLCYAGRKFCYLCFQVGRGHPSDWGVFRNKPYHAESCFLSWFRAQLSPDEYHTVWFSWSPCHTCADEVVEFLGQYRHVTLISAFIARLYYFWDPPFQGLRRLQASQVRLDIMSFADYKRCWENFVDHGMFRQRNLLRHRDLASRLN

>L9KTG4\_TUPCH/9-177  
FYFHFQNLFLFAGRNFTFLCCRVDKERHGTVLVSGVFTHQYHAESHLLWFQKNFLSKDFQVWYVLSWSPCPACAKQVADFLAVHRNVSLTIFARSARLYYFWDPEFRDGLHRLFEKARVAIMSPKDFENCWEGFVNGRDFRPWDNMVENYQSLRITLQE

>I3M955\_ICTTR/14-186  
FLFHFNRNLWAGRNNTFLCYQVDRERDSTVIHRGVFKTQRLHAELCFYLWHLDPYDQHFHITWIFISWSPCSDCAQQAAFLASHNSLTVYTYARLYYFVFKHSYQEGLRALQREGARVEIMSIREFEHCWENFVYGRPFPRWKNLFRNYFYQVKKLQK

>G3I2J2\_CRIGR/40-210  
FYFHFKNLRYALRKNFTFLCYEVNRECNELVLCQGVFRKENLHAEVCFYLWFHTQVLPDDEKYKITWYVSWSPCNECAEKVAFSLDTHRNLSLAIFSSRLYFWDPDYQDLRRLNQAGAQAAMDFPEFEKWCWKFVNDGKSFPRWKRKINFRFQDNKLRD

>F7EWS7\_RAT/40-210  
FYFHFKNVRYAGRKNFLCYEVNGDPCALVLRQGVFRKQHIHAELCFYVFDKVLSPMEEFKVTWYMSWSPCKCAEQVARFLAHRNLSLAIFSSRLYLLPNYQQGLRQLRQIEGVHVAAMDLPFKKWCWKFVNDGQFPWMLRINFYSFYDCKLQE

>ABEC3\_RAT/26-195  
KFHFKNLRYADRKDTFLCYEVTRDCCSPVLHGGVFNKNIHAELCFYLWFDKVLSPREEFKITWYMSWSPCECAEQVRLATHHNLSDIFSSRLYNIRDPENQNLRLVQEGAQAAMDLPEFKKWCWKFVNDGRRFRPWKLLTNFRYQDSKLQE

>ABEC3\_MOUSE/26-195  
KFHFKNLRYAGRKDTFLCYEVTRDCCSPVLHGGVFNKNIHAELCFYLWFDKVLSPREEFKITWYMSWSPCECAEQVRLATHHNLSDIFSSRLYNVQDPETQNLRLVQEGAQAAMDLPEFKKWCWKFVNDGRRFRPWKLLTNFRYQDSKLQE

>F6XHA6\_MACMU/213-383  
FYFHFENLQKAGRNETWLCFAVEIKQSTVWTKGVFRNQHCHAERCFLSWFCODNLSPKKNYQVTWYVSWSPCECAGEVAEFLATHSNVKTITARLYYFWDTDYQEGRLSLEEGASMEIMGYEDFKYCWENFVYNGEFPKPKWGINTNFRFLRRLWK

>A0A096NK50\_PAPAN/213-383  
FYFHFKNLRTADRNETWLCFAVEIKQSTVWTKGVFRNQHCHAERCFLSWFRDNLSPKKNYQVTWYVSWSPCECAGEVAEFLARYSNVQLTYTARLYYFWDTDYQEGRLSLEEGASVQIMGYEDFKYCWENFVYNGEFPKPKWGINTNFRFLRRLWK

>G3RD21\_GORGO/200-370  
FYFHFKNLRYAGRNETWLCFAVEIKQSTVWTKGVFRNQHCHAERCFLSWFCODILSPNTNYQVTWYVSWSPCECAGEVAEFLARHSNVNLTITARLYYFWDTDYQEGRLSLEEGASVKIMGYKDFKYCWENFVYNDPEFPKPKWGLKYNFLDLSKLQE

>A0A096NK49\_PAPAN/167-388  
FYFHFKNLRYAGRNETWLCFAVEIKQSTVWTKGVFRNQHCHAERCFLSWFCEDILSPNTDYQVTWYVSWSPCLDCAGEVAEFLARHSNVNLTITARLYYFWDTDYQEGRLSLEEGASVQIMGYEDFKYCWENFVYNDPEFPKPKWGLKYNFLDLSKLQE

>A0A0D9R238\_CHLSB/197-367  
FYFHFKNLRYAGRNETWLCFAVEIKQSTVWTKGVFRNQHCHAERCFLSWFCEDILSPNTDYQVTWYVSWSPCLDCAGEVAEFLARHSNVNLTITARLYYFWDTDYQEGRLSLEEGASVQIMGYEDFKYCWENFVYNDPEFPKPKWGLKYNFLDLSKLQE

>G3RRB4\_GORGO/39-209  
FYFQFKNLWEADRNETWLCFTEVGKRRSVVWTKGVFRNQHCHAERCFLSWFCODILSPNTNYQVTWYVSWSPCECAGEVAEFLARHSNVNLTITARLYYFWDTDYQEGRLSLEEGASVKIMGYKDFKYCWENFVYNDPEFPKPKWGLKYNFLDLSKLQE

>G3RUE8\_GORGO/17-187  
FYFQFKNLWEADRNETWLCFTEVGKRRSVVWTKGVFRNQHCHAERCFLSWFCODILSPNTNYEVWYVSWSPCECAGVAEFLARHSNVNLTITARLYYFWDTDYQEGRLSLEEGASVKIMGYKDFVSCWKNFVYNDPEFPKPKWGLQTNFRLLKRLRE

>Q6ICH2\_HUMAN/17-199  
FYDNFENEPILGRSYTWLCEYEVKIRGRNSLWDTGVFRGEHCHAERCFLSWFCODILSPNTNYEVWYVSWSPCECAGEVAEFLARHSNVNLTITARLYYFWDTDYQEGRLSLEEGASVKIMGYKDFVSCWKNFVYNDPEFPKPKWGLQTNFRLLKRLRE

>ABC3D\_HUMAN/213-383  
FYFHFKNLRYAGRNETWLCFTEVMEVHSAVRKGVFRNQHCHAERCFLSWFCODILSPNTNYEVWYVSWSPCECAGEVAEFLARHSNVNLTITARLYYFWDTDYQEGRLSLEEGASVKIMGYKDFVSCWKNFVYNDPEFPKPKWGLQTNFRLLKRLRE

>ABC3C\_GORGO/17-187  
FYFQFKNLWEADRNETWLCFTEVGKRRSVVWTKGVFRNQHCHAERCFLSWFCODILSPNTNYQVTWYVSWSPCECAGEVAEFLARHSNVNLTITARLYYFQDQYQEGRLSLEEGASVAVKIMDYEDFKYCWENFVYNDPEFPKPKWGLKYNFRLLKRLRE

>ABC3C\_HUMAN/17-187  
FYFQFKNLWEADRNETWLCFTEVGKRRSVVWTKGVFRNQHCHAERCFLSWFCODILSPNTNYQVTWYVSWSPCECAGEVAEFLARHSNVNLTITARLYYFQYPCYQEGRLSLEEGASVAVKIMDYEDFKYCWENFVYNDPEFPKPKWGLKYNFRLLKRLRE

>H2P4E8\_PONAB/17-187  
FYFQFKNLWEADRNETWLCFTEVKEHHTVWTKGVFRNQHCHAERCFLSWFCODILSPNTNYQVTWYVSWSPCECAGEVAEFLARHSNVNLTITARLYYFQYPCYQEGRLSLEEGASVAVKIMDYEDFKYCWENFVYNDPEFPKPKWGLKYNFRLLKRLRE

>A0A096NK46\_PAPAN/17-187  
FYFQFKNLWEADRNETWLCFTEVKEHHTVWTKGVFRNQHCHAERCFLSWFCODILSPNTNYQVTWYVSWSPCECAGEVAEFLARHSNVNLTITARLYYFQYPCYQEGRLSLEEGASVAVKIMDYEDFKYCWENFVYNDPEFPKPKWGLKYNFRLLKRLRE

>A0A0D9R255\_CHLSB/17-187  
FYFQFKNLWEADRNETWLCFTEVGRHHTVWTKGVFRNQHCHAERCFLSWFCODILSPNTNYQVTWYVSWSPCECAGEVAEFLARHSNVNLTITARLYYFQYPCYQEGRLSLEEGASVAVKIMDYEDFKYCWENFVYNDPEFPKPKWGLKYNFRLLKRLRE

>F6XHB3\_MACMU/37-207  
FYFQFKNLWEADRNETWLCFAVEIKQSTVWTKGVFRNQHCHAERCFLSWFCODILSPNTNYQVTWYVSWSPCLDCAGEVAEFLARHSNVNLTITARLYYFQYPCYQEGRLSLEEGASVAVKIMDYEDFKYCWENFVYNDPEFPKPKWGLKYNFRLLKRLRE

>HOVE76\_CAVPO/1-121  
LHAELSFLSWFDTELSFDENYKVTWYMSWSPCECAEIVFLDNHNNVLTITARLYYHWPNTYKELRGLVQGGTRLYTMAFPEFEDCWSLNVNETFRPWFNFHKKCSLQDKTLQK

>G5AYU4\_HETGA/17-183  
FYFHFENLRYAGRNETWLCFTEVKEHHTVWTKGVFRNQHCHAERCFLSWFCODILSPNTNYQVTWYVSWSPCECAEIVFLDNHNNVLTITARLYYHWPNTYKELRGLVQGGTRLYTMAFPEFEDCWSLNVNETFRPWFNFHKKCSLQDKTLQK

>HOVZF7\_CAVPO/17-183  
FYFHFENLRYAGRNETWLCFTEVKEHHTVWTKGVFRNQHCHAERCFLSWFCODILSPNTNYQVTWYVSWSPCECAEIVFLDNHNNVLTITARLYYHWPNTYKELRGLVQGGTRLYTMAFPEFEDCWSLNVNETFRPWFNFHKKCSLQDKTLQK

>G5AYU3\_HETGA/12-181  
FYFHFENLRYAGRNETWLCFTEVKEHHTVWTKGVFRNQHCHAERCFLSWFCODILSPNTNYQVTWYVSWSPCECAEIVFLDNHNNVLTITARLYYHWPNTYKELRGLVQGGTRLYTMAFPEFEDCWSLNVNETFRPWFNFHKKCSLQDKTLQK

>G5AYU5\_HETGA/20-189  
FRFYFNRNLRCAGRNETWLCFTEVKEHHTVWTKGVFRNQHCHAERCFLSWFCODILSPNTNYQVTWYVSWSPCECAEIVFLDNHNNVLTITARLYYHWPNTYKELRGLVQGGTRLYTMAFPEFEDCWSLNVNETFRPWFNFHKKCSLQDKTLQK

>A0A091EM42\_FUKDA/42-211  
KFHFENLRYAGRNETWLCFTEVKEHHTVWTKGVFRNQHCHAERCFLSWFCODILSPNTNYQVTWYVSWSPCECAEIVFLDNHNNVLTITARLYYHWPNTYKELRGLVQGGTRLYTMAFPEFEDCWSLNVNETFRPWFNFHKKCSLQDKTLQK

>A0A091EM42\_FUKDA/225-394  
FYFHFENLRYAGRNETWLCFTEVKEHHTVWTKGVFRNQHCHAERCFLSWFCODILSPNTNYQVTWYVSWSPCECAEIVFLDNHNNVLTITARLYYHWPNTYKELRGLVQGGTRLYTMAFPEFEDCWSLNVNETFRPWFNFHKKCSLQDKTLQK

>HOXYD2\_OTOGA/17-183  
FNCFHNNRPLRRNDTWLCEVKTSSNPGFYSQVGNPWHTELCILTWARPMLSHHHFYQITWYMSWSPCANCAQWAAFLATHENSVLTIYTAHIYMYRQDYRQGLRMIEEGTRVYIMFSKEFHQHCWENFVDHGMCWNRVKNKYFLVTLQLNE

>HOXYD2\_OTOGA/192-348  
FYNQFNNTVPVGRDITWLCFEVKNNSNSPGFHRGSSENRHAEGVFLTFQKEMPPNHHYEVWYVSWSPCECAEIVFLDNHNNVLTITARLYYHWPNTYKELRGLVQGGTRLYTMAFPEFEDCWSLNVNETFRPWFNFHKKCSLQDKTLQK

>A0A096N7U5\_PAPAN/17-167  
FYFHFENLRYAGRNETWLCFTEVKEHHTVWTKGVFRNQHCHAERCFLSWFCODILSPNTNYQVTWYVSWSPCECAEIVFLDNHNNVLTITARLYYHWPNTYKELRGLVQGGTRLYTMAFPEFEDCWSLNVNETFRPWFNFHKKCSLQDKTLQK

>H9KW44\_CALJA/2-132  
QHHPMRFLRHWFRKWLHSDQYEVTVFVSWSPCPCARNVAEFLTEDGKVTITFVARLYYFVWPHYRRELRQLCQPRATMKIMSYGEFQHCWDFVNDRLYKPNWPKPHYTLHLITLGE

>ABC3G\_PAPAN/17-191  
FYFHFENLRYAGRNETWLCFTEVKEHHTVWTKGVFRNQHCHAERCFLSWFCODILSPNTNYQVTWYVSWSPCECAEIVFLDNHNNVLTITARLYYHWPNTYKELRGLVQGGTRLYTMAFPEFEDCWSLNVNETFRPWFNFHKKCSLQDKTLQK

>G7PFK4\_MACFA/13-187  
FYFHFENLRYAGRNETWLCFTEVKEHHTVWTKGVFRNQHCHAERCFLSWFCODILSPNTNYQVTWYVSWSPCECAEIVFLDNHNNVLTITARLYYHWPNTYKELRGLVQGGTRLYTMAFPEFEDCWSLNVNETFRPWFNFHKKCSLQDKTLQK

>A0A0D9R229\_CHLSB/28-202  
FYFHFENLRYAGRNETWLCFTEVKEHHTVWTKGVFRNQHCHAERCFLSWFCODILSPNTNYQVTWYVSWSPCECAEIVFLDNHNNVLTITARLYYHWPNTYKELRGLVQGGTRLYTMAFPEFEDCWSLNVNETFRPWFNFHKKCSLQDKTLQK

>ABC3G\_MACMU/10-184  
FVSNFNNRPLGLNTWLCCEVKTDPSPGLDAKIFGQKYPHPEMRFLRHWFRKWLHSDQYEVTVFVSWSPCECAEIVFLDNHNNVLTITARLYYHWPNTYKELRGLVQGGTRLYTMAFPEFEDCWSLNVNETFRPWFNFHKKCSLQDKTLQK



>H2P4E9\_PONAB/31-202  
FSYNFNRPILRRNTVWLCYEVKTKGSPRPLDAKIFRGQKHPMFRFFHWFWSKWRKLRDQEQCEVTWYMSWSPCTKCTRNVAFLAEDPKVTLTIFVARLYYFWDQDYQEARSLCRPRANMKIMNYDEFQHCWKNKFVYSRELFEPWNNLPKYIPLHKV

>ABC3G\_HUMAN/17-190  
FSYNFNRPILRRNTVWLCYEVKTKGSPRPLDAKIFRGQKYHPEMFRFFHWFWSKWRKLRDQEQYEVTVWYISWSPCTKCTRDMAFLAEDPKVTLTIFVARLYYFWDQDYQEARSLCQPRATMKIMNYDEFQHCWKNKFVYSRELFEPWNNLPKYIPLHMLG

>ABC3G\_GORGO/17-190  
FSYNFNRPILRRNTVWLCYEVKTKGSPRPLDAKIFRGQKYHPEMFRFFHWFWSKWRKLRDQEQYEVTVWYISWSPCTKCTRNVAFLAEDPKVTLTIFVARLYYFWDQDYQEARSLCQPRATMKIMNYDEFQHCWKNKFVYSRELFEPWNNLPKYIPLHMLG

>G3RD21\_GORGO/17-186  
FSYNFNRPILRRNTVWLCYEVKTKGSPRPLDAKIFRGQKYHAEMCFLSWFCGNQLPAYKCFQITVFSWTPCPCDVAKLAFLAEHPNVTLTISAARLYYWERDYRRALRRLRQAGARVKIMDDEEFAYCWENFVYSGQPFMPWHKFDNYAFLHRTLKE

>ABC3F\_HUMAN/17-186  
FSYNFNRPILRRNTVWLCYEVKTKGSPRPLDAKIFRGQEHHAEMCFLSWFCGNQLPAYKCFQITVFSWTPCPCDVAKLAFLAEHPNVTLTISAARLYYWERDYRRALRRLRQAGARVKIMDDEEFAYCWENFVYSGQPFMPWHKFDNYAFLHRTLKE

>A0A096NK49\_PAPAN/1-153  
WFCFEVKTGRSPMPWDKIFRGQKYHAEMCFLSRFCGNQLPAYKRFQITVFSWTPCPCDVAKVAFLAEHPNVTLTISAARLYYWERDYRRALRRLRQAGARVKIMDNEEFAYCWENFVYNGQSFMPWDFDNYAFLHCKLKE

>A0A096NK45\_PAPAN/1-153  
FYYHFENKILGRSYTWLCYEVKIKDPSKLVWTVGFRGQEHHAEMCFLSRFCGNQLPAYKRFQITVFSWTPCPCDVAKVIEFLAEHPNVTLTISAARLYYWRDWRALRRLRQAGARVKIMDDEEFAYCWENFVYNGQSFMPWDFDNYAFLHCKLKE

>F7FXJ2\_MACMU/2-130  
EHHAEMCFLSRFCGNQLPAYKRFQITVFSWTPCPCDVAKVIEFLAEHPNVTLTISAARLYYWRDWRALRRLRQAGARVKIMDDEEFAYCWENFVYNGQSFMPWDFDNYAFLHCKLKE

>A0A0D9R238\_CHLSB/17-183  
FYYNFENEPILGRSYTWLCYEVKIKDPSKLVWTVGFRGQKYHAEMCFLSWFCGNQLPAYKRFQITVFSWTPCPCDVAKVTEFLAEHPNVTLTISAARLYYWRDWRALRRLRQAGARVKIMDDEEFAYCWENFVYNGQSFMPWDFDNYAFLHCKLKE

>A0A096NK50\_PAPAN/17-199  
FDYNFENEPILGRSYTWLCYEVKIKDPSKLVWTVGFRGQKYHAEMCFLSRFCGNQLPAYKRFQITVFSWTPCPCDVAKVTEFLAEHPNVTLTISAARLYYWRDWRALRRLRQAGARVKIMDDEEFAYCWENFVYNGQSFMPWDFDNYAFLHCKLKE

>F6XHA6\_MACMU/17-199  
FNYNFENEPILGRSYTWLCYEVKIKDPSKLVWTVGFRGQKYHAEMCFLSWFCGNQLPAYKRFQITVFSWTPCPCDVAKVTEFLAEHPNVTLTISAARLYYWRDWRALRRLRQAGARVKIMDDEEFAYCWENFVYNGQSFMPWDFDNYAFLHCKLKE

>A0A0D9R289\_CHLSB/17-187  
FYYHFENEPILGRSYTWLCYEVKIKDPSKLVWTVGFRGQEHHAEMCFLSWFCGNQLPAYKRFQITVFSWTPCPCDVAKVAFLAEHPNVTLTISAARLYYWERDYRRALRRLRQAGARVKIMDDEEFAYCWENFVYNGQSFMPWDFDNYAFLHCKLKE

>G1RY77\_NOMLE/17-187  
FYYNFENEPILGRSYTWLCYEVKIKDPSKLVWTVGFRGQEHHAEMCFLSWFCGNQLPAYKRFQITVFSWTPCPCDVAKVAFLAEHPNVTLTISAARLYYWRDWRALRRLRQAGARVKIMDDEEFAYCWENFVYNGQSFMPWDFDNYAFLHCKLKE

>H2P4E7\_PONAB/17-187  
FYYDFENEPILRRNTVWLCYEVKIKDPSKLVWTVGFRGQEHHAEMCFLSWFCGNQLPAYKRFQITVFSWTPCPCDVAKVAFLAEHPNVTLTISAARLYYWERDYRRALRRLRQAGARVKIMDDEEFAYCWENFVYNGQSFMPWDFDNYAFLHCKLKE

>H2QLP5\_PANTR/17-187  
FYYNFENEPILGRSYTWLCYEVKIRGHSNLWTVGFRGQEHHAEMCFLSWFCGNQLPAYKRFQITVFSWTPCPCDVAKLAFLAEHPNVTLTISAARLYYWERDYRRALRRLRQAGARVKIMDDEEFAYCWENFVYNGQSFMPWDFDNYAFLHCKLKE

>ABC3D\_HUMAN/17-199  
FYDNFENEPILGRSYTWLCYEVKIRGRSNLWTVGFRGQEHHAEMCFLSWFCGNQLPAYKRFQITVFSWTPCPCDVAKVVKVTKFLAEHPNVTLTISAARLYYRDRDRWVLLRHLKAGARVKIMDDEEFAYCWENFVYNGQSFMPWDFDNYAFLHCKLKE

>ABC3B\_HUMAN/17-187  
FYDNFENEPILGRSYTWLCYEVKIRGRSNLWTVGFRGQKYHAEMCFLSWFCGNQLPAYKCFQITVFSWTPCPCDVAKLAFLAEHPNVTLTISAARLYYWERDYRRALRRLRQAGARVKIMDDEEFAYCWENFVYNGQSFMPWDFDNYAFLHCKLKE

>G3SFT2\_GORGO/17-187  
FYDNFENEPILGRSYTWLCYEVKIRGRSNLWTVGFRGQEHHAEMCFLSWFCGNQLPAYKCFQITVFSWTPCPCDVAKLAFLAEHPNVTLTISAARLYYWERDYRRALRRLRQAGARVKIMDDEEFAYCWENFVYNGQSFMPWDFDNYAFLHCKLKE

## Supplementary Sequences 2

### Amino acid sequences of BE4, rAPOBEC1, ancestral APOBECs, ABE7.10, and P2A-GFP

Within base editor sequences, NLS sequences are purple, APOBEC sequences are blue, linkers are yellow, Cas9 nickase sequence is green, and UGI sequences are grey.

#### *BE4max and AncBE4max*

MKRTADGSEFESPKKKRKV [APOBEC] SGGSSGGSSGSETPGTSESATPESGGSSGGS DKKYSIGLAIGT  
NSVGWAVITDEYKVPSSKFKVLGNTDRHSIKKNLIGALLFDSGETAEATRLKRTARRRYTRRKNRICYLQEIFSNE  
MAKVDDSFHRLSEESFLVEEDKKHERHPHIFGNIVDEVAYHEKYPTIYHLRKKLVSDTKADLRILIYLAHMIKFR  
GHFLIEGDLNPDNSVDKFLIQLVQTYNQLFEENPINASGVDAKILSARLSKSRRLLENLIAQLPGEKKNGLFGNLI  
ALSLGLTPNFKSNFDLAEDAKLQSKDYYDDLDNLLAQIGDQYADFLAAKNLSDAILLSDILRVNTEITKAPLSA  
SMIKRYDEHHQDLTLLKALVRQQLPEKYKEIFFDQSKNGYAGYIDGGASQEEFYKFIKPILEKMDGTEELLVKLNR  
EDLLRKQRTFDNGSIPHQIHLGELHAILRRQEDFYFPLKDNREKIEKILFRIPYYVGPLARGNSRFAWMTRKSEE  
TITPWNFEVVDKGASAQSFIERMTNFDKNLPNEKVLPKHSLLYEYFTVYNELTKVKYVTEGMRKPAFLSGEQKK  
AIVDLLFKTNRKVTVKQLKEDYFKKIECFDSVEISGVEDRFNASLGTYHDLKIKDKDFLDNEENEDILEDIVLTLTL  
FEDREMIERLKYAHLFDDKVMKQLKRRRYTGWGRLSRKLINGIRDKQSGKTILDFLKSDGFANRNFQMQLI HDD  
SLTFKEDIQKAQVSGQDLSHEHIANLAGSPAIKKGIQTVMVDELVKVMGRHKPENIVIEMARENQTTQKGQK  
NSRERMKRIE EGKELGSQILKEHPVENTQLQNEKLYLYLQNGRDMYVDQELDINRLSDYDVDHIVPQSFLKDD  
SIDNKVLTRSDKNRGKSDNVPSEEVVKKMKNYWRQLLNAKLITQRKFDNLTKAERGGLSELDKAGFIKRQLVET  
RQITKHVAQILD SRMNTKYDENDKLIREVKVITLKSCLVSDFRKDFQFYKREINNYHHAHDAYLNAVVG TALIKKY  
PKLESEFVYGDYKVYDVRKMIKAKSEQEIGKATAKYFFYSNIMNFFKTEITLANGEIRKRPLIETNGETGEIVWDKG  
RDFATVRKVL SMPQVNIVKKTVEVQTGGFSKESILPKRNSDKLIARKKDWDPKYGGFDSPTVAYSVLVVAKVEK  
GKSKKLKSVKELLGITIMERS SFKPNIDFLEAKGYKEVKKDLIILPKYSLFELENGRKRMLASAGELQKGNELAL  
PSKYVNFLYLASHYEKLGSPEDNEQKQLFVEQHKHYLDEIIEQISEFSKRVLADANLDKVL SAYNKHHRDKPIRE  
QAENIIHLFTL TNLGAPAAFYFDTTIDRKRYTSTKEVLDATLIHQ SITGLYETRIDLSQLGGD SGGSSGGSSGGS T  
NLSDIIEKETGKQLVIQESILMLPEEVEEVIGNKPESDILVHTAYDESTDENVMMLTSDAPEYKPPWALVIQDSNGEN  
KIKML SGGSSGGSSGGS TNLSDIIEKETGKQLVIQESILMLPEEVEEVIGNKPESDILVHTAYDESTDENVMMLTSD  
APEYKPPWALVIQDSNGENKIKML SGGSS KRTADGSEFESPKKKRKV [optional P2A-GFP]

#### *Rat APOBEC1*

SSETGPVAVDPTLRRRIEPHEFEVFFDPREL RKETCLLYEINWGGRRHSIWRHTSQNTNKHVEVNFIEKFTTERTYF  
CPNTRCSITWFLSWSPCGECSRAITEFLSRYPHVTLFIYIARLYHHADPRNRQGLRDLISSGVTIQIMTEQESGYC  
WRNFVNYSNSNEAHWPYPHLLWVRLYVLELYCIILGLPPCLNILRRKQPQLTFFTIALQSCHYQRLPPHILWATG  
LK

#### *Anc689 APOBEC*

SSETGPVAVDPTLRRRIEPHEFEVFFDPREL RKETCLLYEIKWGTSHKIWRHSSKNNTTKHVEVNFIEKFTSERHF  
CPSTSCSITWFLSWSPCGECSKAITEFLSQHPNVTLVIYVARLYHHMDQQNRQGLRDLVNSGVTIQIMTAPEYDY  
CWRNFVNYPGKEAHWPYPPLWMLKLYALELHAGILGLPPCLNILRRKQPQLTFFTIALQSCHYQRLPPHILWA  
TGLK

#### *Anc687 APOBEC*

SSETGPVAVDPTLRRRIEPHEFEVFFDPREL RKEACCLLYEIKWGTSHKIWRNSGKNNTTKHVEVNFIEKFTSERHF  
CPSISCSITWFLSWSPCWECSCAIREFLSQHPNVTLVIYVARLFQHMDDQQNRQGLRDLVNSGVTIQIMTASEYDH  
CWRNFVNYPGKEAHWPYPPLWMLKLYALELHAGILGLPPCLNILRRKQPQLTFFTIALQSCHYQRLPPHILWA  
TGLK

#### *Anc686 APOBEC*

SSETGPVAVDPTLRRRIEPEFFNRNYDPREL RKETYLLYEIKWGTSHKIWRHTSNNRTQHAENVNFLENFFNELYF  
NPSTHCSITWFLSWSPCGECSKAIVEFLKEHPNVNLEIYVARLYL CEDERNRQGLRDLVNSGVTIRIMNLPDYN

CWRTFVSHQGGDEDYWPRHFAPWVRLYVLELYCIILGLPPCLNILRRKQPQLTFFTIALQSCHYQRLPPHILWAT  
GLK

*Anc655 APOBEC*

SSETGPVAVDPTLRRRIEFPYFQFNNDPRACRRKTYLCYELKQDGSTWVWKRTLHNKGRHAEICFLEKISSLEK  
LDPAQHRYITWYMSWSPCSNCAQKIVDFLKEHPHVNLRIYVARLYYHEEERYQEGLRNLRRSGVSIRVMDLPDF  
EHCWETFVDNNGGPFQWPWGLEELNSKQLSRRLQAGILGLPPCLNILRRKQPQLTFFTIALQSCHYQRLPPHIL  
WATGLK

*Anc733 APOBEC*

SSETGPVAVDPTLRRRIEFPFHQFNNDPRAYRRKTYLCYELKQDGSTWVLDRTLNRKGRHAEICFLDKINSWER  
LDPAQHRYRTWYMSWSPCSNCAQQVDFLKEHPHVNLRIFAARLYYHEEQRRYQEGLRSLRSGVPPVAVMTLP  
DFEHCWETFVDHGGRRPFQPWDGLEELNSRSLSRRLQAGILGLPPCLNILRRKQPQLTFFTIALQSCHYQRLPPHI  
LWATGLK

*P2A-GFP*

GSGATNFSLLKQAGDVEENPGP\_MVSKGEELFTGVVPILVELDGDVNGHKFSVSGEGEGDATYGKLTCLKFICTT  
GKLPVPWPTLVTTLTYGVCFSRYPDHMKQHDFFKSAMPEGYVQERTIFFKDDGNYKTRAEVKFEGDTLVNRIE  
LKIGDFKEDGNILGHKLEYNYNVSHNVYIMADKQKNGIKVNFKIRHNIEDGSVQLADHYQQNTPIGDGPVLLPDNH  
YLSTQSALS KDPNEKRDHMLLEFVTAAGITLGMDELYKSGGSPKKKRKV

*ABEmax*

MKRTADGSEFESPKKKRKV MSEVEFSHEYWMRHALTLAKRAWDEREVPVGAVLVHNNRVIGEGWNRPIGRH  
DPTAHAEIMALRQGGGLVMQNYRLIDATLYVTLEPCVMCAGAMIHSRIGRVVFGARDAKTGAAGSLMDVLHHPG  
MNRHVEITEGILADECAALLSDFFRMRRQEIKAKKAQSSTD\_SGGSSGGSSGSETPGTSESATPESSGGSSG  
GSS\_EVEFSHEYWMRHALTLAKRARDEREVPVGAVLVLNRRVIGEGWNRRAIGLHDPTAHAEIMALRQGGGLVMQ  
NYRLIDATLYVTLEPCVMCAGAMIHSRIGRVVFGVRNAKTGAAGSLMDVLHYPGMNRHVEITEGILADECAALLC  
YFFRMPRQVFNAQKKAQSSTDSSGGSSGGSSGSETPGTSESATPESSGGSSGGSDKKYSIGLAIGTNSVGWAVI  
TDEYKVPKFKFVLGNTDRHSIKKNLIGALLFDSGETAEATRLKRTARRRYTRRKNRICYLQEIFSNEMAKVDDSF  
FHRLEESFLVEEDKKHERHPIFGNIVDEVAYHEKYPTIYHLRKKLVDSTDKADLRLIYLALAHMIKFRGHFLIEGDL  
NPDNSDVKLFIQLVQTYNQLFEENPINASGVDAKAILSARLSKSRLENLIAQLPGEKKNLFGNLIALSLGLTPN  
FKSNFDLAEDAKLQLSKDTYDDDLNLLAQIGDQYADLFLAAKNLSDAILSDILRVNTEITKAPLSASMIKRYDEH  
HQDLTLLKALVRQQLPEKYKEIFFDQSKNGYAGYIDGGASQEEFYKFIKPILEKMDGTEELLVKLNREDLLRKQRT  
FDNGSIPHQIHLGELHAILRRQEDFYFPLKDNREKIEKILTFRIPYYVGPLARGNSRFAMTRKSEETITPWNFEE  
VVDKGASAQSFIERMTNFDKNLPNEKVLPHKSLLEYFTVYNELTKVKYVTEGMRKPAFLSGEQKKAIVDLLFKT  
NRKVTVKQLKEDYFKKIECFDSVEISGVEDRFNASLGTYHDLLKIIKDKDFLDNEENEDILEDIVLTLTLFEDREMIE  
ERLKYAHLFDDKVMKQLKRRRYTGWGRLSRKLINGIRDKQSGKTILDFLKSDFANRNFMLIHDDSLTFKEDI  
QKAQVSGQGDSLHEHIANLAGSPAIKKILQTVKVVDELVKVMGRHKPENIVIEMARENQTTQKGQKNSRERMK  
RIEIGIKELGSQILKEHPVENTQLQNEKLYLYLQNGRDMYVDQELDINRLSDYDVDHIVPQSFLKDDSIDNKVLT  
RSDKNRGKSDNVPSEEVVKMKMKNYWRQLLNAKLITQRKFDNLTKAERGGSELDKAGFIKRLVETRQITKHVA  
QILDSRMNTKYDENDKLIREVKVITLKSCLVSDFRKDFQFYKREINNYHHAHDAYLNAVVGTAIHKYPKLESEF  
VYGDYKVYDVRKMIKSEQEIGKATAKYFFYSNIMNFFKTEITLANGEIRKRPLIETNGETGEIVWDKGRDFATVR  
KVL SMPQVNIVKKTEVQTGGFSKESILPKRNSDKLIARKKDWDPKKYGGFDSPTVAYSVLVVAKVEKGKSKKLLK  
SVKELLGITIMERSSFENPIDFLEAKGYKEVKDLIIKLPKYSLFELENGRKRMLASAGELQKGNELALPSKYVNF  
LYLASHYEKLGSPEDNEQKQLFVEQHKHYLDEIIEQISEFSKRVLADANLDKVL SAYNKHRDKPIREQAENIIHL  
FTLTNLGAPAAFKYFDTTIDRKRYTSTKEVLDATLIHQSI TGLYETRIDLSQLGGD\_KRTADGSEFEPKKKRKV[opti

onal P2A-GFP]

### Supplementary Sequences 3

#### Codon optimized nucleotide sequences of BE4, rAPOBEC, Ancestral APOBECs, ABE7.10, and P2A GFP

Within base editor sequences, NLS sequences are **purple**, APOBEC sequences are **blue**, linkers are **yellow**, Cas9 nickase sequence is **green**, and UGI sequences are **grey**.

*BE4max and AncBE4max*

ATGAAACGGACAGCCGACGGAAGCGAGTTCGAGTCACCAAAGAAGAAGCGGAAAGTC **APOBEC** TCTGG  
AGGATCTAGCGGAGGATCCTCTGGCAGCGAGACACCAGGAACAAGCGAGTCAGCAACACCAGAGAGCAG  
TGGCGGCAGCAGCGGCGGCAGC **GACAAGAAGTACAGCATCGGCCTGGACATCGGCACCAACTCTGTGG**  
GCTGGGCCGTGATCACCGACGAGTACAAGGTGCCAGCAAGAAATCAAGGTGCTGGGCAACACCGACC  
GGCACAGCATCAAGAAGAACCTGATCGGAGCCCTGCTGTTTCGACAGCGGCGAAACAGCCGAGGCCACCC  
GGCTGAAGAGAACC GCCAGAAGAAGATACACCAGACGGAAGAACC GGATCTGCTATCTGCAAGAGATCTT  
CAGCAACGAGATGGCCAAGGTGGACGACAGCTTCTTCCACAGACTGGAAGAGTCCTTCTGGTGGAAGAG  
GATAAGAAGCACGAGCGGCACCCCATCTTCGGCAACATCGTGGACGAGGTGGCCTACCACGAGAAGTACC  
CCACCATCTACCACCTGAGAAAGAACTGGTGGACAGCACCGACAAGGCCGACCTGCGGCTGATCTATCT  
GGCCCTGGCCACATGATCAAGTTCGGGGCCACTTCTGATCGAGGGCGACCTGAACCCCGACAACAGC  
GACGTGGACAAGCTGTTTCATCCAGCTGGTGCAGACCTACAACCAGCTGTTTCGAGGAAAACCCCATCAACG  
CCAGCGGCGTGGACGCCAAGGCCATCCTGTCTGCCAGACTGAGCAAGAGCAGACGGCTGGAAAATCTGAT  
CGCCAGCTGCCCGGCGAGAAGAAGAATGGCCTGTTTCGAAACCTGATTGCCCTGAGCCTGGGCCTGAC  
CCCCAACTTCAAGAGCAACTTCGACCTGGCCGAGGATGCCAACTGCAGCTGAGCAAGGACACCTACGAC  
GACGACCTGGACAACCTGCTGGCCAGATCGGCGACCACTACGCGACCTGTTTCTGGCCGCAAGAACC  
TGTCCGACGCCATCCTGCTGAGCGACATCCTGAGAGTGAACACCGAGATCACCAAGGCCCCCTGAGCGC  
CTCTATGATCAAGAGATACGACGAGCACCACCAGGACCTGACCCTGCTGAAAGCTCTCGTGCGGCAGCAG  
CTGCCTGAGAAGTACAAAGAGATTTTCTTCGACCAGAGCAAGAACGGCTACGCCGGCTACATTGACGGCG  
GAGCCAGCCAGGAAGAGTTCTACAAGTTCATCAAGCCCATCCTGGAAAAGATGGACGGCACCCGAGGAACT  
GCTCGTGAAGCTGAACAGAGAGGACCTGCTGCGGAAGCAGCGGACCTTCGACAACGGCAGCATCCCCCA  
CCAGATCCACCTGGGAGAGCTGCACGCCATTCTGCGGCGGCAGGAAGATTTTACCCATTCTGAAGGAC  
AACCGGGAAAAGATCGAGAAGATCCTGACCTTCGCATCCCCTACTACGTGGGCCCTCTGGCCAGGGGAA  
ACAGCAGATTGCCTGGATGACCAGAAAGAGCGAGGAAACCATCACCCCTGGAACCTTCGAGGAAGTGGT  
GGACAAGGGCGCTTCCGCCAGAGCTTCATCGAGCGGATGACCAACTTCGATAAGAACCTGCCAACGAG  
AAGGTGCTGCCAAGCACAGCCTGCTGTACGAGTACTTCACCGTGTATAACGAGCTGACCAAAGTGAATA  
CGTGACCGAGGGAATGAGAAAGCCCGCCTTCTGAGCGGCGAGCAGAAAAGGCCATCGTGGACCTGCT  
GTTCAAGACCAACCGGAAAGTGACCGTGAAGCAGCTGAAAGAGGACTACTTCAAGAAAATCGAGTGCTTCG  
ACTCCGTGGAAATCTCCGGCGTGGAAGATCGGTTCAACGCCTCCCTGGGCACATACCACGATCTGCTGAA  
AATTATCAAGGACAAGGACTTCTGGACAATGAGGAAAACGAGGACATTCTGGAAGATATCGTGCTGACC  
TGACACTGTTTGAGGACAGAGAGATGATCGAGGAACGGCTGAAAACCTATGCCACCTGTTTCGACGACAAA  
GTGATGAAGCAGCTGAAGCGGCGGAGATACACCGGCTGGGGCAGGCTGAGCCGGAAGCTGATCAACGGC  
ATCCGGGACAAGCAGTCCGGCAAGACAATCCTGGATTTCTGAAGTCCGACGGCTTCGCCAACAGAACTT  
CATGCAGCTGATCCACGACGACAGCCTGACCTTTAAAGAGGACATCCAGAAAGCCCAGGTGTCCGGCCAG  
GGCGATAGCCTGCACGAGCACATTGCCAATCTGGCCGGCAGCCCCGCCATTAAGAAGGGCATCCTGCAGA  
CAGTGAAGGTGGTGGACGAGCTCGTGAAGTGATGGGCCGGCACAAGCCGAGAACATCGTGATCGAAAT  
GGCCAGAGAGAACCAGACCACCCAGAAGGGACAGAAGAACAGCCGCGAGAGAATGAAGCGGATCGAAGA  
GGGCATCAAAGAGCTGGGCAGCCAGATCCTGAAAGAACACCCCGTGAAAACACCCAGCTGCAGAACGAG  
AAGCTGTACCTGTACTACCTGCAGAATGGGCGGGATATGTACGTGGACCAGGAACTGGACATCAACCGGC  
TGTCCGACTACGATGTGGACCATATCGTGCCTCAGAGCTTTCTGAAGGACGACTCCATCGACAACAAGGTG  
CTGACCAGAAGCGACAAGAACC GGGGCAAGAGCGACAACGTGCCCTCCGAAGAGGTCTGTAAGAAGATG  
AAGAATACTGGCGGACGCTGCTGAACGCCAAGCTGATTACCCAGAGAAAGTTCGACAATCTGACCAAGG  
CCGAGAGAGGCGGCCTGAGCGAACTGGATAAGGCCGGCTTCATCAAGAGACAGCTGGTGGAAACCCGGC

AGATCACAAGCACGTGGCACAGATCCTGGACTCCCGGATGAACACTAAGTACGACGAGAATGACAAGCT  
GATCCGGGAAGTGAAAGTGATCACCTGAAGTCCAAGCTGGTGTCCGATTTCCGGAAGGATTTCCAGTTTT  
ACAAAGTGCGCGAGATCAACAACACCACCACGCCACGACGCCTACCTGAACGCCGTCGTGGGAACCGC  
CCTGATCAAAAAGTACCCTAAGCTGGAAAGCGAGTTCGTGTACGGCGACTACAAGGTGTACGACGTGCGG  
AAGATGATCGCCAAGAGCGAGCAGGAAATCGGCAAGGCTACCGCCAAGTACTTCTTCTACAGCAACATCAT  
GAACTTTTTCAAGACCGAGATTACCCTGGCCAACGGCGAGATCCGGAAGCGGCCTCTGATCGAGACAAAC  
GGCGAAACCGGGGAGATCGTGTGGGATAAGGGCCGGGATTTTCCACCGTGCGGAAAGTGCTGAGCATG  
CCCCAAGTGAATATCGTGAAAAGACCGAGGTGCAGACAGGCGGCTTACGCAAAGAGTCTATCCTGCCCA  
AGAGGAACAGCGATAAGCTGATCGCCAGAAAGAAGGACTGGGACCCTAAGAAGTACGGCGGCTTCGACAG  
CCCACCGTGGCCTATTCTGTGCTGGTGGTGGCCAAAGTGAAAAGGGCAAGTCCAAGAACTGAAGAGT  
GTGAAAGAGCTGCTGGGGATCACCATCATGGAAGAAGCAGCTTCGAGAAGAATCCCATCGACTTTCTGGA  
AGCCAAGGGCTACAAAGAAGTGAAAAGGACCTGATCATCAAGCTGCCTAAGTACTCCCTGTTTCGAGCTGG  
AAAACGGCCGGAAGAGAATGCTGGCCTCTGCCGGCGAACTGCAGAAGGGAAACGAACTGGCCCTGCCCT  
CCAAATATGTGAACTTCTGTACCTGGCCAGCCACTATGAGAAGCTGAAGGGCTCCCCGAGGATAATGAG  
CAGAAACAGCTGTTTGTGGAACAGCACAAGCACTACCTGGACGAGATCATCGAGCAGATCAGCGAGTTCTC  
CAAGAGAGTGATCCTGGCCGACGCTAATCTGGACAAAGTGCTGTCCGCCTACAACAAGCACCCGGGATAAG  
CCCATCAGAGAGCAGGCCGAGAATATCATCCACCTGTTTACCCTGACCAATCTGGGAGCCCCTGCCGCCTT  
CAAGTACTTTGACACCACCATCGACCGGAAGAGGTACACCAGCACCAAAGAGGTGCTGGACGCCACCCTG  
ATCCACCAGAGCATCACCGCCTGTACGAGACACGGATCGACCTGTCTCAGCTGGGAGGTGAC\_AGCGGC  
GGGAGCGGCGGGAGCGGGGAGC\_ACTAATCTGAGCGACATCATTGAGAAGGAGACTGGGAAACAGCT  
GGTCATTGAGGAGTCCATCCTGATGCTGCCTGAGGAGGTGGAGGAAGTGATCGGCAACAAGCCAGAGTCT  
GACATCCTGGTGCACACCGCCTACGACGAGTCCACAGATGAGAATGTGATGCTGCTGACCTCTGACGCC  
CCGAGTATAAGCCTTGGGCCCTGGTCATCCAGGATTCTAACGGCGAGAATAAGATCAAGATGCTG\_AGCGG  
AGGATCCGGAGGATCTGGAGGCAGC\_ACCAACCTGTCTGACATCATCGAGAAGGAGACAGGCAAGCAGCT  
GGTCATCCAGGAGAGCATCCTGATGCTGCCCGAAGAAGTCAAGAAGTGATCGGAAACAAGCCTGAGAGC  
GATATCCTGGTCCATACCGCCTACGACGAGAGTACCGACGAAAATGTGATGCTGCTGACATCCGACGCC  
CAGAGTATAAGCCTTGGGCTCTGGTCATCCAGGATTCCAACGGAGAGAACAAAATCAAATGCTG\_TCTGG  
CGGCTCA\_AAAAGAACCGCCGACGGCAGCGAATTCGAGCCCAAGAAGAAGGAAAGTC\_ [optional P2A-  
GFP]\_TAA

*Rat APOBEC1*

TCCTCAGAGACTGGGCCTGTGCGCGTCGATCCAACCCTGCGCCGCGGATTGAACCTCACGAGTTTGAAG  
TGTTCTTTGACCCCGGGAGCTGAGAAAGGAGACATGCCTGCTGTACGAGATCAACTGGGGAGGCAGGCA  
CTCCATCTGGAGGCACACCTCTCAGAACACAAATAAGCACGTGGAGGTGAACTTCATCGAGAAGTTTACCA  
CAGAGCGGTACTTCTGCCCCAATACCAGATGTAGCATCACATGTTTTCTGAGCTGGTCCCCTTGC GGAGAG  
TGTAGCAGGGCCATCACCGAGTTCCTGTCCAGATATCCACACGTGACACTGTTTATCTACATCGCCAGGCT  
GTATCACACGCAGACCCAAGGAATAGGCAGGGCCTGCGCGATCTGATCAGCTCCGGCGTGACCATCCAG  
ATCATGACAGAGCAGGAGTCCGGCTACTGCTGGCGGAACTTCGTGAATTATTCTCTAGCAACGAGGCCCA  
CTGGCCTAGGTACCCACACCTGTGGGTGCGCCTGTACGTGCTGGAGCTGTATTGCATCATCCTGGGCCTG  
CCCCCTTGTCTGAATATCCTGCGGAGAAAGCAGCCCCAGCTGACCTTCTTTACAATCGCCCTGCAGTCTTG  
TCACTATCAGAGGCTGCCACCCACATCCTGTGGGCCACAGGCCTGAAG

*Anc689 APOBEC*

AGCAGTGAAACCGGACCAGTGGCAGTGGACCAACCCTGAGGAGACGGATTGAGCCCATGAATTTGAAG  
TGTTCTTTGACCCAAGGGAGCTGAGGAAGGAGACATGCCTGCTGTACGAGATCAAGTGGGGCACAAGCCA  
CAAGATCTGGCGCCACAGCTCCAAGAACACCACAAAGCACGTGGAAGTGAATTTTCATCGAGAAGTTTACCT  
CCGAGCGGCACTTCTGCCCCCTTACCAGCTGTTCCATCACATGTTTTCTGTCTTGGAGCCCTTGC GGCGAG  
TGTTCCAAGGCCATCACCGAGTTCCTGTCTCAGCACCCCTAACGTGACCCCTGGTCATCTACGTGGCCCGGCT  
GTATCACCATGAGACCAGCAGAACAGGCAGGGCCTGCGCGATCTGGTGAATTCTGGCGTGACCATCCAG  
ATCATGACAGCCCCAGAGTACGACTATTGCTGGCGGAACTTCGTGAATTATCCACCTGGCAAGGAGGCACA  
CTGGCCAAGATACCCACCCCTGTGGATGAAGCTGTATGCACTGGAGCTGCACGCAGGAATCCTGGGCCTG

CCTCCATGTCTGAATATCCTGCGGAGAAAGCAGCCCCAGCTGACATTTTTCCACCATTGCTCTGCAGTCTTGT  
CACTATCAGCGGCTGCCTCCTCATATTCTGTGGGCTACAGGCCTTAA

*Anc687 APOBEC*

TCATCAGAAACAGGACCAGTCGCCGTGGACCCAACACTGAGGAGAAGGATTGAGCCCCATGAATTTGAAG  
TCTTTTTCGACCCCAGGGAGCTGAGGAAGGAGGCATGCCTGCTGTACGAGATCAAGTGGGGCACAAGCCA  
CAAGATCTGGCGCAACAGCGGCAAGAACCACAAAGCACGTGGAAGTGAATTTTCATCGAGAAGTTTACCT  
CCGAGCGGCACTTCTGCCCCCTCTATCAGCTGTTCCATCACATGGTTTCTGTCTTGGAGCCCTTGCTGGGAG  
TGTTCCAAGGCCATCCGCGAGTTCCTGTCTCAGCACCCCTAACGTGACCCTGGTCATCTACGTGGCCCGGC  
TGTTTCAACACATGGACCAGCAGAACAGGCAGGGCCTGCGCGATCTGGTGAATTCTGGCGTGACCATCCA  
GATCATGACAGCCTCAGAGTACGACCATTGCTGGCGGAACCTCGTGAATTATCCACCTGGCAAGGAGGCA  
CACTGGCCAAGATACCCACCCCTGTGGATGAAGCTGTATGCACTGGAGCTGCACGCAGGAATCCTGGGCC  
TGCTCCATGTCTGAATATCCTGCGGAGAAAGCAGCCCCAGCTGACATTTTTCACTATCGCACTGCAGAGC  
TGTCATTACCAGAGACTGCCTCCTCATATCCTGTGGGCTACAGGCCTTAA

*Anc686 APOBEC*

AGCAGCGAGACAGGACCCGTGGCAGTGGACCCTACACTGAGGAGGAGGATTGAGCCCGAATTTTTCAACA  
GGAACTACGACCCCAGAGAGCTGCGGAAGGAGACATACCTGCTGTATGAGATCAAGTGGGGCAAGGAGTC  
CAAGATCTGGCGGCACACCTCTAACAATAGAACACAGCACGCCGAGGTGAACCTTCTGGAGAATTTCTTTA  
ATGAGCTGTACTTTAATCCTTCTACCCACTGCAGCATCACATGGTTCTGAGCTGGTCCCATGCGGCGAG  
TGTTCTAAGGCCATCGTGGAGTTTCTGAAGGAGCACCCCAACGTGAATCTGGAGATCTACGTGGCCAGGCT  
GTATCTGTGCGAGGACGAGAGGAACAGGCAGGGCCTGCGGGATCTGGTGAATAGCGGCGTGACCATCAG  
AATCATGAACCTGCCTGACTACAATTATTGTTGGCGCACATTCGTGTCCCACCAGGGAGGCGACGAGGATT  
ATTGGCCAAGGCACTTTGCACCATGGGTGCGCCTGTACGTGCTGGAGCTGTATTGCATCATCCTGGGCCT  
GCCCCCTTGTCTGAACATCCTGCGGAGAAAGCAGCCCCAGCTGACATTTTCCACCATCGCACTGCAGAGTT  
GTCATTACCAGCGACTGCCTCCTCATATCCTGTGGGCTACAGGCCTTAA

*Anc655 APOBEC*

TCATCAGAGACCGGACCTGTGGCAGTGGACCCAACCCTGCGACGGAGAATCGAGCCCTTTTACTTTTCAGTT  
CAACAACGACCCAAGAGCCTGCCGGAGAAAGACCTACCTGTGCTATGAGCTGAAGCAGGACGGCTCTACC  
TGGGTGTGGAAGCGGACACTGCACAACAAGGGCAGACACGCCGAGATCTGCTTCTGGAGAAGATCAGCT  
CCCTGGAGAAGCTGGACCCTGCCCAGCACTACAGGATCACATGGTATATGTCTTGGAGCCCATGCTCCAA  
CTGTGCCCAGAAGATCGTGGATTTTCTGAAGGAGCACCCACACGTGAATCTGCGGATCTACGTGGCCAGA  
CTGTACTATCACGAGGAGGAGAGGTATCAGGAGGGCCTGAGGAACCTGAGGCGCTCCGGCGTGTCTATCA  
GAGTGATGGACCTGCCCGATTTTCGAGCACTGCTGGGAGACATTCGTGGATAACGGAGGAGGACCTTTCCA  
GCCATGGCCCGGCCTGGAGGAGCTGAATAGCAAGCAGCTGTCCCGGAGACTGCAGGCAGGAATCCTGGG  
CCTGCCCCCTTGTCTGAATATCCTGAGGCGCAAGCAGCCCCAGCTGACATTTTTCCACCATCGCACTGCAGA  
GTTGTCATTATCAGCGACTGCCTCCTCATATCCTGTGGGCTACAGGCCTTAA

*Anc733 APOBEC*

AGCAGCGAGACCGGACCTGTGGCAGTGGACCCAACCCTGAGAAGACGCATTGAGCCATTTTCAATTTTCAGTT  
TAACAACGACCCCAGAGCCTACCGGAGAAAGACCTACCTGTGCTATGAGCTGAAGCAGGACGGCTCCACC  
TGGGTGCTGGATCGGACACTGAGAAACAAGGGCCGGCACGCCGAGATCTGTTTCTGGACAAGATCAATT  
CCTGGGAGAGGCTGGATCCCGCCAGCACTACCGCGTGACATGGTATATGAGCTGGTCCCCTTGCTCTAA  
CTGTGCCCAGCAGGTGGTGGATTTCTGAAGGAGCACCCACACGTGAATCTGCGGATCTTTGCCGCCAGA  
CTGTACTATCACGAGCAGAGGCGCTATCAGGAGGGCCTGCGGAGCCTGAGGGGAAGCGGAGTGCTGTG  
GCCGTGATGACCCTGCCAGACTTCGAGCACTGCTGGGAGACATTTGTGGATCACGGCGGCCGGCCATTCC  
AGCCATGGGACGGCCTGGAGGAGCTGAACTCTAGGAGCCTGTCCCGGAGACTGCAGGCAGGAATCCTGG  
GCCTGCCCCCTTGTCTGAATATCCTGAGGCGCAAGCAGCCCCAGCTGACCTTTTTTACCATCGCACTGCAG  
AGTTGTCATACTACCAGAGACTGCCTCCTCATATCCTGTGGGCTACAGGCCTTAA

*P2A-GFP*

TCTGGTGGTTCTCCCAAGAAGAAGAGGAAAGTCGGAAGCGGAGCTACTAACTTCAGCCTGCTGAAGCAGG  
CTGGAGACGTGGAGGAGAACCCTGGACCTATGGTGAGCAAGGGCGAGGAGCTGTTACCCGGGGTGGTGC  
CCATCCTGGTCGAGCTGGACGGCGACGTAACGGCCACAAGTTCAGCGTGTCCGGCGAGGGCGAGGGCG  
ATGCCACCTACGGCAAGCTGACCCTGAAGTTCATCTGCACCACCGCAAGCTGCCCGTGCCCTGGCCAC  
CCTCGTGACCACCCTGACCTACGGCGTGAGTGCTTCAGCCGCTACCCCGACCACATGAAGCAGCACGAC  
TTCTTCAAGTCCGCCATGCCCCAAGGCTACGTCCAGGAGCGCACCATCTTCTTCAAGGACGACGGCAACTA  
CAAGACCCGCGCCGAGGTGAAGTTCGAGGGCGACACCCTGGTGAACCGCATCGAGCTGAAGGGCATCGA  
CTTCAAGGAGGACGGCAACATCCTGGGGCACAAGCTGGAGTACAACAGCCACAACGTCTATATCA  
TGGCCGACAAGCAGAAGAACGGCATCAAGGTGAACCTCAAGATCCGCCACAACATCGAGGACGGCAGCGT  
GCAGCTCGCCGACCACTACCAGCAGAACACCCCATCGGGCAGCGCCCGTGCTGCTGCCCGACAACCA  
CTACCTGAGCACCCAGTCCGCCCTGAGCAAAGACCCCAACGAGAAGCGCGATCACATGGTCCTGCTGGAG  
TTCGTGACCGCCGCCGGGATCACTCTCGGCATGGACGAGCTGTACAAGTCTGGTGGTTCTCCCAAGAAGA  
AGAGGAAAGTCTAA

*ABEmax*

ATGAAACGGACAGCCGACGGAAGCGAGTTCGAGTCAACAAAGAAGAAGCGGAAAGTC TCTGAAGTCGAG  
TTTAGCCACGAGTATTGGATGAGGCACGCACTGACCCTGGCAAAGCGAGCATGGGATGAAAGAGAAGTCC  
CCGTGGGCGCCGTGCTGGTGACAACAATAGAGTGATCGGAGAGGGATGGAACAGGCCAATCGGCCGCC  
ACGACCCTACCGCACACGCAGAGATCATGGCACTGAGGCAGGGAGGCCTGGTCATGCAGAATTACCGCCT  
GATCGATGCCACCCTGTATGTGACACTGGAGCCATGCGTGATGTGCGCAGGAGCAATGATCCACAGCAGG  
ATCGGAAGAGTGGTGTTCGGAGCACGGGACGCCAAGACCGGCGCAGCAGGCTCCCTGATGGATGTGCTG  
CACCACCCCGGCATGAACCACCGGGTGGAGATCACAGAGGGAATCCTGGCAGACGAGTGCGCCGCCCTG  
CTGAGCGATTTCTTTAGAATGCGGAGACAGGAGATCAAGGCCAGAAGAAGGCACAGAGCTCCACCGACT  
CTGGAGGATCTAGCGGAGGATCCTCTGGAAGCGAGACACCAGGCACAAGCGAGTCCGCCACACCAGAGA  
GCTCCGGCGGCTCCTCCGGAGGATCCTCTGAGGTGGAGTTTTCCACGAGTACTGGATGAGACATGCCCT  
GACCCTGGCCAAGAGGGCACGCGATGAGAGGGAGGTGCCTGTGGGAGCCGTGCTGGTGTGAACAATAG  
AGTGATCGGCGAGGGCTGGAACAGAGCCATCGGCCTGCACGACCCAACAGCCCATGCCGAAATTATGGC  
CCTGAGACAGGGCGGCCCTGGTCATGCAGAACTACAGACTGATTGACGCCACCCTGTACGTGACATTGAG  
CCTTGCGTGATGTGCGCCGGCGCCATGATCCACTCTAGGATCGGCCGCGTGGTGTGGCGTGAGGAAC  
GCAAAAACCGGCGCCGCAGGCTCCCTGATGGACGTGCTGCACTACCCCGGCATGAATCACCGCGTCAAAA  
TTACCGAGGGAATCCTGGCAGATGAATGTGCCGCCCTGCTGTGCTATTTCTTTCCGATGCCTAGACAGGTG  
TTCAATGCTCAGAAGAAGGCCAGAGCTCCACCGAC TCCGGAGGATCTAGCGGAGGCTCCTCTGGCTCT  
GAGACACCTGGCACAAGCGAGAGCGCAACACCTGAAAGCAGCGGGGGCAGCAGCGGGGGTCA GACAA  
GAAGTACAGCATCGGCCTGGCCATCGGCACCAACTCTGTGGGCTGGGCCGTGATCACCGACGAGTACAAG  
GTGCCAGCAAGAAATCAAGGTGCTGGGCAACACCGACCGGCACAGCATCAAGAAGAACCTGATCGGAG  
CCCTGCTGTTGACAGCGGCGAAACAGCCGAGGCCACCCGGCTGAAGAGAACCGCCAGAAGAAGATACA  
CCAGACGGAAGAACCGGATCTGCTATCTGCAAGAGATCTTCAGCAACGAGATGGCCAAGGTGGACGACAG  
CTTCTTCCACAGACTGGAAGAGTCTTCTGGTGGAAAGAGGATAAGAAGCACGAGCGGCACCCCATCTTC  
GGCAACATCGTGGACGAGGTGGCTACCACGAGAAGTACCCACCATCTACCACCTGAGAAAGAAACTGG  
TGGACAGCACCGACAAGGCCGACCTGCGGCTGATCTATCTGGCCCTGGCCACATGATCAAGTTCGGGG  
CCACTTCTGATCGAGGGCGACCTGAACCCCGACAACAGCGACGTGGACAAGCTGTTTCATCCAGCTGGT  
CAGACCTACAACCAGCTGTTTCGAGGAAAACCCCATCAACGCCAGCGGCGTGGACGCCAAGGCCATCCTGT  
CTGCCAGACTGAGCAAGAGCAGACGGCTGAAAATCTGATCGCCAGCTGCCCGGCGAGAAGAAGATG  
GCCTGTTCCGAAACCTGATTGCCCTGAGCCTGGGCCTGACCCCAACTTCAAGAGCAACTTCGACCTGGC  
CGAGGATGCCAAACTGCAGCTGAGCAAGGACACCTACGACGACGACCTGGACAACCTGCTGGCCAGATC  
GGCGACCAGTACGCCGACCTGTTCTGGCCGCCAAGAACCTGTCCGACGCCATCCTGCTGAGCGACATCC  
TGAGAGTGAACACCGAGATCACCAAGGCCCCCTGAGCGCCTCTATGATCAAGAGATACGACGAGCACCA  
CCAGGACCTGACCCTGCTGAAAGCTCTCGTGCGGCAGCAGCTGCCTGAGAAGTACAAGAGATTTCTTC  
GACCAGAGCAAGAACGGCTACGCCGGCTACATTGACGCGGAGCCAGCCAGGAAGAGTTCTACAAGTTCA  
TCAAGCCCATCCTGAAAAGATGGACGGCACCGAGGAACTGCTCGTGAAGCTGAACAGAGAGGACCTGCT

GCGGAAGCAGCGGACCTTCGACAACGGCAGCATCCCCACCAGATCCACCTGGGAGAGCTGCACGCCAT  
TCTGCGGCGGCAGGAAGATTTTTACCCATTCTGAAGGACAACCGGGAAAAGATCGAGAAGATCCTGACCT  
TCCGCATCCCCTACTACGTGGGCCCTCTGGCCAGGGGAAACAGCAGATTGCCTGGATGACCAGAAAGAG  
CGAGGAAACCATCACCCCCTGGAACCTTCGAGGAAGTGGTGGACAAGGGCGCTTCCGCCAGAGCTTCATC  
GAGCGGATGACCAACTTCGATAAGAACCTGCCCAACGAGAAGGTGCTGCCAAGCACAGCCTGCTGTACG  
AGTACTTCACCGTGTATAACGAGCTGACCAAAGTGAAATACGTGACCGAGGGAATGAGAAAAGCCCGCCTTC  
CTGAGCGGCGAGCAGAAAAAGGCCATCGTGGACCTGCTGTTCAAGACCAACCGGAAAAGTGACCGTGAAGC  
AGCTGAAAGAGGACTACTTCAAGAAAATCGAGTGTTCGACTCCGTGGAAAATCTCCGGCGTGAAGATCG  
GTTCAACGCCTCCCTGGGCACATACCACGATCTGCTGAAAATTATCAAGGACAAGGACTTCTGGACAATG  
AGGAAAACGAGGACATTCTGGAAGATATCGTGTGACCTGACACTGTTTGAGGACAGAGAGATGATCGAG  
GAACGGCTGAAAACCTATGCCACCTGTTTCGACGACAAAGTGATGAAGCAGCTGAAGCGGCGGAGATACA  
CCGGCTGGGGCAGGCTGAGCCGGAAGCTGATCAACGGCATCCGGGACAAGCAGTCCGGCAAGACAATCC  
TGGATTTCTGAAGTCCGACGGCTTCGCCAACAGAACTTCATGCAGCTGATCCACGACGACAGCCTGACC  
TTTAAAGAGGACATCCAGAAAGCCCAGGTGTCCGGCCAGGGCGATAGCCTGCACGAGCACATTGCCAATC  
TGGCCGGCAGCCCCGCCATTAAGAAGGGCATCCTGCAGACAGTGAAGTGGTGGACGAGCTCGTGAAGG  
TGATGGGCCCGGCACAAGCCCAGAACATCGTGATCGAAATGGCCAGAGAGAACCAGACCACCAGAAGG  
GACAGAAGAAGCAGCCGCGAGAGAATGAAGCGGATCGAAGAGGGCATCAAAGAGCTGGGCAGCCAGATCC  
TGAAAGAACACCCCGTGGAAAACACCCAGCTGCAGAACGAGAAGCTGTACCTGTACTACCTGCAGAATGG  
GCGGGATATGTACGTGGACCAGGAAGTGGACATCAACCGGCTGTCCGACTACGATGTGGACCATATCGTG  
CCTCAGAGCTTTCTGAAGGACGACTCCATCGACAACAAGGTGCTGACCAGAAGCGACAAGAACCAGGGCA  
AGAGCGACAACGTGCCCTCCGAAGAGGTGCTGAAGAAGATGAAGAATACTGGCGGCAGCTGCTGAACGC  
CAAGCTGATTACCCAGAGAAAGTTCGACAATCTGACCAAGGCCGAGAGAGGCGGCCTGAGCGAACTGGAT  
AAGGCCGGCTTCATCAAGAGACAGCTGGTGGAAACCCGGCAGATCACAAGCACGTGGCACAGATCCTGG  
ACTCCCGGATGAACACTAAGTACGACGAGAATGACAAGCTGATCCGGGAAGTGAAGTATCACCCTGAA  
GTCCAAGCTGGTGTCCGATTTCCGGAAGGATTTCCAGTTTTACAAAGTGCAGCAGATCAACAATACTACCAC  
ACGCCACGACGCCTACCTGAACGCCGTCGTGGGAACCGCCCTGATCAAAAAGTACCCTAAGCTGGAAAG  
CGAGTTCGTGTACGGCGACTACAAGGTGTACGACGTGCGGAAGATGATCGCCAAGAGCGAGCAGGAAATC  
GGCAAGGCTACCGCCAAGTACTTCTTCTACAGCAACATCATGAACTTTTTCAAGACCGAGATTACCCTGGC  
CAACGGCGAGATCCGGAAGCGGCCCTCTGATCGAGACAAACGGCGAAACCGGGGAGATCGTGTGGGATAA  
GGGCCGGGATTTGCCACCGTGCAGAAAGTGTGAGCATGCCCAAGTGAATATCGTGAAAAAGACCGAG  
GTGCAGACAGGCGGCTTCAGCAAAGAGTCTATCCTGCCAAGAGGAACAGCGATAAGCTGATCGCCAGAA  
AGAAGGACTGGGACCCTAAGAAGTACGGCGGCTTCGACAGCCCCACCGTGGCCTATTCTGTGCTGGTGGT  
GGCCAAAGTGGAAAAGGGCAAGTCCAAGAACTGAAGAGTGTGAAAGAGCTGCTGGGGATCACCATCATG  
GAAAGAAGCAGCTTCGAGAAGAATCCCATCGACTTTCTGGAAGCCAAGGGCTACAAAGAAGTGAAAAAGGA  
CCTGATCATCAAGCTGCCTAAGTACTCCCTGTTTCGAGCTGGAAAACGGCCGGAAGAGAATGCTGGCCTCT  
GCCGGCGAACTGCAGAAGGGAAACGAACTGGCCCTGCCCTCAAATATGTGAACTTCTGTACCTGGCCA  
GCCACTATGAGAAGCTGAAGGGCTCCCCGAGGATAATGAGCAGAAACAGCTGTTTGTGGAACAGCACAA  
GCACTACCTGGACGAGATCATCGAGCAGATCAGCGAGTTCTCCAAGAGAGTGATCCTGGCCGACGCTAAT  
CTGGACAAAGTGTGTCCGCTACAACAAGCACCGGGATAAGCCCATCAGAGAGCAGGCCGAGAATATCA  
TCCACCTGTTTACCCTGACCAATCTGGGAGCCCCTGCCGCCTTCAAGTACTTTGACACCACCATCGACCGG  
AAGAGGTACACCAGCACAAAGAGGTGCTGGACGCCACCCTGATCCACCAGAGCATCACCGGCCTGTACG  
AGACACGGATCGACCTGTCTCAGCTGGGAGGTGAC\_TCTGGCGGCTCAA\_AAAGAACCGCCGACGGCAGC  
GAATTCGAGCCCAAGAAGAAGAGGAAAGTC\_[optional P2A-GFP]\_TAA



## Supplementary Sequences 4

### Target protospacer sequences used in this study.

Target Cs and As are shown in red, with a subscripted number denoting spacer position. PAM sequences are shown in blue.

|                    |                                                                                                                                         |
|--------------------|-----------------------------------------------------------------------------------------------------------------------------------------|
| HEK293_site 2      | GAAC <sub>4</sub> C <sub>6</sub> AAAGCATAGACTGC <sub>GGG</sub>                                                                          |
| HEK293_site 3      | GGC <sub>4</sub> C <sub>5</sub> AGACTGAGCACGTGAT <sub>TGG</sub>                                                                         |
| HEK293_site 4      | GGCA <sub>5</sub> TGCGGCTGGAGGTCC <sub>GGG</sub>                                                                                        |
| <i>RNF2</i>        | GT <sub>CAT</sub> <sub>C<sub>6</sub></sub> TTAGT <sub>CATTACCTG</sub> <sub>AGG</sub>                                                    |
| <i>EMX1</i>        | GAGT <sub>C<sub>5</sub></sub> <sub>C<sub>6</sub></sub> GAGCAGAAGAAG <sub>AGG</sub>                                                      |
| <i>SCN9a</i>       | GTTAGT <sub>C<sub>7</sub></sub> <sub>C<sub>8</sub></sub> TTAAAATGTAGGG <sub>GGG</sub>                                                   |
| <i>MPDU1</i>       | GTT <sub>C<sub>4</sub></sub> <sub>C<sub>5</sub></sub> <sub>C<sub>6</sub></sub> GGT <sub>C<sub>10</sub></sub> ATGCACTACAG <sub>AGG</sub> |
| ABE_site 2         | GAGT <sub>A<sub>5</sub></sub> TG <sub>A<sub>7</sub></sub> GGCATAGACTGC <sub>AGG</sub>                                                   |
| ABE_site 5         | GATG <sub>A<sub>5</sub></sub> G <sub>A<sub>7</sub></sub> T <sub>AAT</sub> GATGAGTC <sub>AGG</sub>                                       |
| ABE_site 13        | GAAG <sub>A<sub>5</sub></sub> T <sub>A<sub>7</sub></sub> GAGAATAGACTGCT <sub>TGG</sub>                                                  |
| ABE_site 16        | GGG <sub>A<sub>4</sub></sub> <sub>A<sub>5</sub></sub> T <sub>A<sub>7</sub></sub> AATCATAGAATCCT <sub>TGG</sub>                          |
| <i>HBG</i> _site 1 | CTTG <sub>A<sub>5</sub></sub> CC <sub>A<sub>8</sub></sub> <sub>A<sub>9</sub></sub> T <sub>A<sub>11</sub></sub> GCCTTGACA <sub>AGG</sub> |
| <i>HBG</i> _site 2 | <sub>A<sub>1</sub></sub> T <sub>A<sub>3</sub></sub> TTTG <sub>A<sub>9</sub></sub> TTG <sub>A<sub>13</sub></sub> GATAGTGT <sub>TGG</sub> |

## Supplementary Sequences 5

### Primers used in this study

All oligonucleotides were purchased from Integrated DNA Technologies (IDT).

#### Primers used for generating sgRNA plasmids

The *MPDU1* guide plasmid was cloned by digesting a modified version of pFYF1320 (Fu, Y. et al. *Nature biotechnology* **31**, 822-826 (2013)) in which BsmBI restriction cut sites were installed via KLD cloning. The primers below were phosphorylated and annealed to enable ligation into BsmBI cut backbone. All guides were designed to include a 5'-G to enable transcription from the hU6 transcription. CCACC was included at the 5' end of the forward primer, and AAAC was included at the 5' end of the reverse primer to complement the overhangs generated by restriction digest. The HEK2, HEK3, HEK4, *RNF2*, *EMX1*, ABE site 2, ABE site 5, ABE site 13, ABE site 16, *SCN9a*, *HBG* site 1, *HBG* site 2 sgRNAs were prepared by KLD cloning as previously described (Kim, Y.B. et al. *Nature biotechnology* **35**, 371-376 (2017)) using the primers listed below.

#### Primers for *MPDU1* sgRNA

JLD 85        CACCGTCCCGGTCATGCACTACAG  
JLD 86        AAACCTGTAGTCATGACCGGGAAC

#### Primers for *SCN9a*, *HBG* site 1, *HBG* site 2, and previously used sgRNAs

Universal reverse primer GGTGTTTCGTCTTTCCACAAG

fwd\_HEK293\_site 2    GAACACAAAGCATAGACTGCGTTTTAGAGCTAGAAATAGCAAGTTAAAATAAGGC  
fwd\_HEK293\_site 3    GGCCAGACTGAGCACGTGAGTTTTAGAGCTAGAAATAGCAAGTTAAAATAAGGC  
fwd\_HEK293\_site 4    GGCCTGCGGCTGGAGGTGGGTTTTAGAGCTAGAAATAGCAAGTTAAAATAAGGC  
fwd\_RNF2            GTCATCTTAGTCATTACCTGGTTTTAGAGCTAGAAATAGCAAGTTAAAATAAGGC  
fwd\_EMX1            GAGTCCGAGCAGAAGAAGAAGTTTTAGAGCTAGAAATAGCAAGTTAAAATAAGGC  
fwd\_ABE\_site 2      GAGTATGAGGCATAGACTGCGTTTTAGAGCTAGAAATAGCAAGTTAAAATAAGGC  
fwd\_ABE\_site 5      GATGAGATAATGATGAGTCAGTTTTAGAGCTAGAAATAGCAAGTTAAAATAAGGC  
fwd\_ABE\_site 13     GAAGATAGAGAATAGACTGCGTTTTAGAGCTAGAAATAGCAAGTTAAAATAAGGC  
fwd\_ABE\_site 16     GGAATAAATCATAGAATCCGTTTTAGAGCTAGAAATAGCAAGTTAAAATAAGGC  
fwd\_SCN9a           GTTAGTCCTAAAATGTAGGGGTTTTAGAGCTAGAAATAGCAAGTTAAAATAAGGC  
fwd\_HBG\_site 1      GCTTGACCAATAGCCTTGACAGTTTTAGAGCTAGAAATAGCAAGTTAAAATAAGGC  
fwd\_HBG\_site 2      GATATTTGCATTGAGATAGTGGTTTTAGAGCTAGAAATAGCAAGTTAAAATAAGGC

#### Primers to amplify genomic loci for HTS of mammalian cell culture experiments

SCN9a HTS Fwd        ACACTCTTCCCTACACGACGCTCTCCGATCTNNNNCGAACACACTGAGACAGAAC  
SCN9a HTS Rev        TGGAGTTCAGACGTGTGCTCTTCCGATCT GCACTCCTAGTTAGGCTTGTG  
Type 1f HTS Fwd      ACACTCTTCCCTACACGACGCTCTCCGATCTNNNNGTCCCTGGATGGATGGGCTATGG  
Type 1f HTS Rev      TGGAGTTCAGACGTGTGCTCTTCCGATCTGGCTTTCCAGACCTGAGTTCCC  
HBG HTS Fwd        ACACTCTTCCCTACACGACGCTCTCCGATCTNNNNCTGGCCTCACTGGACTC  
HBG HTS Rev        TGGAGTTCAGACGTGTGCTCTTCCGATCTCTGACAAAAGAAGTCTGGTATC  
fwd\_HEK293\_site 2\_HTS    ACACTCTTCCCTACACGACGCTCTCCGATCTNNNNCCAGCCCCATCTGTCAAAC  
rev\_HEK293\_site 2\_HTS    TGGAGTTCAGACGTGTGCTCTTCCGATCTTGAATGGATTCTTGGAAACAATGA  
fwd\_HEK293\_site 3\_HTS    ACACTCTTCCCTACACGACGCTCTTCCGATCTNNNNATGTGGGCTGCCTAGAAAGG  
rev\_HEK293\_site 3\_HTS    TGGAGTTCAGACGTGTGCTCTTCCGATCTCCAGCCAAACTTGTCAACC  
fwd\_HEK293\_site 4\_HTS    ACACTCTTCCCTACACGACGCTCTTCCGATCTNNNNGAACCCAGGTAGCCAGAGAC  
rev\_HEK293\_site 4\_HTS    TGGAGTTCAGACGTGTGCTCTTCCGATCTTCTTTCAACCCGAACGGAG  
fwd\_RNF2\_HTS        ACACTCTTCCCTACACGACGCTCTCCGATCTNNNNACGTCTCATATGCCCTTGG

|                     |                                                           |
|---------------------|-----------------------------------------------------------|
| rev_RNF2_HTS        | TGGAGTTCAGACGTGTGCTCTTCCGATCTACGTAGGAATTTTGGTGGGACA       |
| fwd_EMX1_HTS        | ACACTCTTTCCCTACACGACGCTCTTCCGATCTNNNNCAGCTCAGCCTGAGTGTTGA |
| rev_EMX1_HTS        | TGGAGTTCAGACGTGTGCTCTTCCGATCTCTCGTGGGTTTGTGGTTGC          |
| fwd_ABE_site 2_HTS  | ACACTCTTTCCCTACACGACGCTCTTCCGATCTNNNNAGAGACTGATTGCGTGGAGT |
| rev_ABE_site 2_HTS  | TGGAGTTCAGACGTGTGCTCTTCCGATCTCACTCCAGCCTAGGCAACAA         |
| fwd_ABE_site 5_HTS  | ACACTCTTTCCCTACACGACGCTCTTCCGATCTNNNNGTCTGAGGTCACACAGTGGG |
| rev_ABE_site 5_HTS  | TGGAGTTCAGACGTGTGCTCTTCCGATCTCTGAGAGCAGGGACCACATC         |
| fwd_ABE_site 13_HTS | ACACTCTTTCCCTACACGACGCTCTTCCGATCTNNNNTCACTTCAGCCCAGGAGTAT |
| rev_ABE_site 13_HTS | TGGAGTTCAGACGTGTGCTCTTCCGATCTTCTCTTTCTCTCCCCACCC          |
| fwd_ABE_site 16_HTS | ACACTCTTTCCCTACACGACGCTCTTCCGATCTNNNNGGGAGGTGGAGAGAGGATGT |
| rev_ABE_site 16_HTS | TGGAGTTCAGACGTGTGCTCTTCCGATCTTCTGAGGTCTAGGAACCCG          |
