# Supplementary material
Source: PubMed Central journal article supplement (PMC6126947)
Supplement: NIHMS969743-supplement-5.pdf [file NIHMS969743-supplement-5.pdf]

## Reporting Summary

Nature Research wishes to improve the reproducibility of the work that we publish. This form provides structure for consistency and transparency in reporting. For further information on Nature Research policies, see [Authors & Referees](#) and the [Editorial Policy Checklist](#).

### Statistical parameters

When statistical analyses are reported, confirm that the following items are present in the relevant location (e.g. figure legend, table legend, main text, or Methods section).

n/a | Confirmed

- The exact sample size ( $n$ ) for each experimental group/condition, given as a discrete number and unit of measurement
- An indication of whether measurements were taken from distinct samples or whether the same sample was measured repeatedly
- The statistical test(s) used AND whether they are one- or two-sided  
*Only common tests should be described solely by name; describe more complex techniques in the Methods section.*
- A description of all covariates tested
- A description of any assumptions or corrections, such as tests of normality and adjustment for multiple comparisons
- A full description of the statistics including central tendency (e.g. means) or other basic estimates (e.g. regression coefficient) AND variation (e.g. standard deviation) or associated estimates of uncertainty (e.g. confidence intervals)
- For null hypothesis testing, the test statistic (e.g.  $F$ ,  $t$ ,  $r$ ) with confidence intervals, effect sizes, degrees of freedom and  $P$  value noted  
*Give  $P$  values as exact values whenever suitable.*
- For Bayesian analysis, information on the choice of priors and Markov chain Monte Carlo settings
- For hierarchical and complex designs, identification of the appropriate level for tests and full reporting of outcomes
- Estimates of effect sizes (e.g. Cohen's  $d$ , Pearson's  $r$ ), indicating how they were calculated
- Clearly defined error bars  
*State explicitly what error bars represent (e.g. SD, SE, CI)*

*Our web collection on [statistics for biologists](#) may be useful.*

### Software and code

Policy information about [availability of computer code](#)

Data collection

A custom python script, provided in the SI, was used to assess SNPs targetable by base editors on the ClinVar database.

Data analysis

The burrows-wheeler aligner (bwa-mem) and pysamstats are two publically available data analysis tools for HTS analysis. Ancestral reconstruction used: IQ-TREE v 1.6.1, PAML – v 1.8, and MAFFT – Ubuntu version 7.394. Prism 7 was also used to analyze data.

For manuscripts utilizing custom algorithms or software that are central to the research but not yet described in published literature, software must be made available to editors/reviewers upon request. We strongly encourage code deposition in a community repository (e.g. GitHub). See the Nature Research [guidelines for submitting code & software](#) for further information.

### Data

Policy information about [availability of data](#)

All manuscripts must include a [data availability statement](#). This statement should provide the following information, where applicable:

- Accession codes, unique identifiers, or web links for publicly available datasets
- A list of figures that have associated raw data
- A description of any restrictions on data availability

Plasmids encoding BE4max, AncBE4max, and ABE4max have been deposited to Addgene. High-throughput sequencing data are deposited in the NCBI Sequence Read

## Field-specific reporting

Please select the best fit for your research. If you are not sure, read the appropriate sections before making your selection.

Life sciences  Behavioural & social sciences  Ecological, evolutionary & environmental sciences

For a reference copy of the document with all sections, see [nature.com/authors/policies/ReportingSummary-flat.pdf](https://www.nature.com/authors/policies/ReportingSummary-flat.pdf)

## Life sciences study design

All studies must disclose on these points even when the disclosure is negative.

|                 |                                                                                                                                                                                                                                                                   |
|-----------------|-------------------------------------------------------------------------------------------------------------------------------------------------------------------------------------------------------------------------------------------------------------------|
| Sample size     | Experiments were performed in biological triplicate n=3 unless otherwise noted. In previous studies using related experiments we determined this sample size to be sufficient to ensure reproducibility. No statistical tests were used to determine sample size. |
| Data exclusions | No data was excluded.                                                                                                                                                                                                                                             |
| Replication     | All attempts at replication were successful, and standard deviations were within expected ranges.                                                                                                                                                                 |
| Randomization   | Different cell passages were used for each biological replicate.                                                                                                                                                                                                  |
| Blinding        | Not applicable, as samples were processed identically through standard and in some cases automated procedures (DNA sequencing, transfection, DNA isolation) that should not bias outcomes.                                                                        |

## Reporting for specific materials, systems and methods

### Materials & experimental systems

| n/a                                 | Involved in the study                                     |
|-------------------------------------|-----------------------------------------------------------|
| <input checked="" type="checkbox"/> | <input type="checkbox"/> Unique biological materials      |
| <input type="checkbox"/>            | <input checked="" type="checkbox"/> Antibodies            |
| <input type="checkbox"/>            | <input checked="" type="checkbox"/> Eukaryotic cell lines |
| <input checked="" type="checkbox"/> | <input type="checkbox"/> Palaeontology                    |
| <input checked="" type="checkbox"/> | <input type="checkbox"/> Animals and other organisms      |
| <input checked="" type="checkbox"/> | <input type="checkbox"/> Human research participants      |

### Methods

| n/a                                 | Involved in the study                              |
|-------------------------------------|----------------------------------------------------|
| <input checked="" type="checkbox"/> | <input type="checkbox"/> ChIP-seq                  |
| <input type="checkbox"/>            | <input checked="" type="checkbox"/> Flow cytometry |
| <input checked="" type="checkbox"/> | <input type="checkbox"/> MRI-based neuroimaging    |

## Antibodies

|                 |                                                                                                                                                                                                               |
|-----------------|---------------------------------------------------------------------------------------------------------------------------------------------------------------------------------------------------------------|
| Antibodies used | Rabbit anti-HA antibody from Cell Signaling Technology, product # 3724S, Lot 8, C2954 used at 1:1000 dilution; Rabbit anti-B-actin from Cell Signaling, product # 4970S, Lot 14, 13E5 used at 1:200 dilution. |
| Validation      | Validation was performed by supplier.                                                                                                                                                                         |

## Eukaryotic cell lines

Policy information about [cell lines](#)

|                                                                   |                                                           |
|-------------------------------------------------------------------|-----------------------------------------------------------|
| Cell line source(s)                                               | HEK293T (ATCC), N2A (ATCC), Fibroblast (Coriell, GM20958) |
| Authentication                                                    | Cells were authenticated by the supplier.                 |
| Mycoplasma contamination                                          | HEK293T cells tested negative for mycoplasma.             |
| Commonly misidentified lines (See <a href="#">ICLAC</a> register) | No commonly misidentified cell lines were used.           |

## Plots

Confirm that:

- The axis labels state the marker and fluorochrome used (e.g. CD4-FITC).
- The axis scales are clearly visible. Include numbers along axes only for bottom left plot of group (a 'group' is an analysis of identical markers).
- All plots are contour plots with outliers or pseudocolor plots.
- A numerical value for number of cells or percentage (with statistics) is provided.

## Methodology

- |                           |                                                                                                                                                                                                                                                                                                                                                                                                                                                                                                                                                                                                                                                                                                                                                                                                               |
|---------------------------|---------------------------------------------------------------------------------------------------------------------------------------------------------------------------------------------------------------------------------------------------------------------------------------------------------------------------------------------------------------------------------------------------------------------------------------------------------------------------------------------------------------------------------------------------------------------------------------------------------------------------------------------------------------------------------------------------------------------------------------------------------------------------------------------------------------|
| Sample preparation        | Cells were grown in tissue culture, transfected or nucleofected as described in the text and grown for 3 days. Cells were then trypsinized and filtered to remove debris before sorting.                                                                                                                                                                                                                                                                                                                                                                                                                                                                                                                                                                                                                      |
| Instrument                | FACSAria II                                                                                                                                                                                                                                                                                                                                                                                                                                                                                                                                                                                                                                                                                                                                                                                                   |
| Software                  | BD FACS DIVA software was used for analysis.                                                                                                                                                                                                                                                                                                                                                                                                                                                                                                                                                                                                                                                                                                                                                                  |
| Cell population abundance | The abundance of cells in the post-sort fraction was dependent upon cell type and sorting condition. HEK293T mCherry+ in trans cells were typically over 50% of the population, GFP/mCherry dual+ cells were also typically over 50% of the population, BE4-P2A-GFP GFP/mCherry dual+ cells were typically over 20% of the population, BE4max-P2A-GFP and ancBE4max-P2A-GFP GFP/mCherry dual+ cells were typically over 40% of the population. N2A In trans mCherry+ cells were typically over 60% of the population. N2A GFP+ cells for BE4max-P2A-GFP and ancBE4-P2A-GFP were typically over 30% of the population. Fibroblast in trans mCherry+ cells were typically over 20% of the population. Fibroblast GFP+ cells for BE4max-P2A-GFP and ancBE4max-P2A-GFP were typically over 10% of the population. |
| Gating strategy           | Negative control (unstained) and fluorophore-positive cells were used to establish gates for each cell type. Gates were drawn to collect cells expressing either fluorophore. See the provided examples for gates used.                                                                                                                                                                                                                                                                                                                                                                                                                                                                                                                                                                                       |
- Tick this box to confirm that a figure exemplifying the gating strategy is provided in the Supplementary Information.
